# Supplementary material for: Diastereoselective synthesis of propargylic N-hydroxylamines via NHC–copper(i) halide-catalyzed reaction of terminal alkynes with chiral nitrones on water
Source: Royal Society of Chemistry journal article supplement (doi:10.1039/c4cc08742a), 2014-12-22

Electronic Supplementary Information

for

**Diastereoselective synthesis of propargylic N-hydroxylamines via NHC-copper(I) halide-catalyzed  
reaction of terminal alkynes with chiral nitrones on water**

Łukasz Woźniak, Olga Krajewska-Staszewska and Michał Michalak

**Institute of Organic Chemistry, Polish Academy of Sciences**

**Kasprzaka 44/52, 01-224 Warsaw, Poland**

|                                                                                    |            |
|------------------------------------------------------------------------------------|------------|
| <b>General remarks.....</b>                                                        | <b>S2</b>  |
| <b>General procedure for synthesis of propargylic <i>N</i>-hydroxylamines.....</b> | <b>S2</b>  |
| <b>References.....</b>                                                             | <b>S14</b> |
| <b>Copies of spectra.....</b>                                                      | <b>S15</b> |

## General remarks

NMR spectra were recorded in  $\text{CDCl}_3$  or  $\text{DMSO-}d_6$  solutions (unless indicated otherwise); chemical shifts are quoted on the  $\delta$  scale, ppm, with the solvent signal as the internal standard ( $\text{CHCl}_3$ ,  $^1\text{H}$  NMR 7.26 ppm;  $\text{CDCl}_3$ ,  $^{13}\text{C}$  NMR 77.00 ppm,  $\text{DMSO-}d_6$  2.50 ppm,  $^{13}\text{C}$  NMR 39.40 ppm). High resolution mass spectra (HRMS) were taken using EI technique or electrospray ionisation (ESI). Column chromatography was performed on Merck silica gel 60, 230-400 mesh. TLC was performed on aluminum sheets, Merck 60F 254. Anhydrous solvents were obtained by distillation over  $\text{CaCl}_2$  ( $\text{CH}_2\text{Cl}_2$ ) or Na/benzophenone (THF, hexane).

Air-sensitive reactions were performed in flame-dried glassware under argon. Organic extracts were dried and solvents were evaporated in a rotary evaporator. Reagents were used as they were purchased unless otherwise indicated. Phenylacetylene (**2a**), 1-ethynyl-4-fluorobenzene (**2b**), 1-ethynyl-4-methoxybenzene (**2c**), 1-ethynyl-2-methoxybenzene (**2d**), 4-ethynyl-*N,N*-dimethylaniline (**2e**) and 3-ethynylthiophene (**2f**) were commercially available from Aldrich. 1-Ethynyl-4-nitrobenzene (**2h**)<sup>1</sup> and benzyl but-3-yn-1-yl ether (**8**)<sup>2</sup> were prepared followed by literature procedures.  $[\text{IMes}]_2\text{CuPF}_6$  were commercially available from Aldrich and used as received.  $\text{SiMesCuCl}$ ,<sup>3</sup>  $\text{SiMesCuBr}$ ,<sup>4</sup>  $\text{IMesCuCl}$ ,<sup>3</sup>  $\text{IMesCuBr}$ ,<sup>5</sup>  $\text{SiPrCuCl}$ ,<sup>3</sup>  $\text{SiPrCuBr}$ ,<sup>6</sup>  $\text{SiPrCuI}$ ,<sup>6</sup>  $\text{IPrCuCl}$ ,<sup>3</sup>  $\text{IPrCuBr}$ ,<sup>6</sup>  $\text{IPrCuI}$ ,<sup>6</sup>  $[\text{ICy}]_2\text{CuPF}_6$ ,<sup>7</sup> and  $[\text{IPr}]_2\text{CuPF}_6$ <sup>8</sup> were prepared followed by literature procedure. Nitrones **1a**,<sup>9</sup> **1b**,<sup>10</sup> **1c**<sup>11</sup> and **1d**<sup>12</sup> were prepared followed by literature procedures.

**General procedure for synthesis of propargylic *N*-hydroxylamine:** To a solution (or suspension) of nitrone (1 eq.) in degassed water (0.2 M), acetylene (1.2 eq.), copper catalyst (5 mol%) and  $\text{Et}_3\text{N}$  or TMG (*N,N,N',N'*-tetramethylguanidine, 1.0 eq.) were added at rt as follows. The biphasic mixture was stirred for indicated time. Then reaction mixture was diluted with EtOAc (15 mL per 1 mmol of used nitrone), and the aqueous phase was separated and extracted with two additional portions of EtOAc. The combined extracts were washed with brine, dried over  $\text{Na}_2\text{SO}_4$  and evaporated. The residue was chromatographed on silica (silica : crude reaction mixture = 30 : 1 w/w) using an appropriate eluting system to afford product.

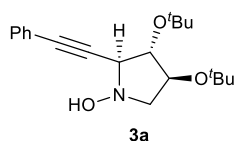

**(2S,3S,4S)-3,4-di-*tert*-Butoxy-2-(phenylethynyl)pyrrolidin-1-ol (3a)** was obtained according to general procedure using nitrone **1a** (229.3 mg, 1.0 mmol), phenylacetylene (130  $\mu$ L, 1.2 mmol), Et<sub>3</sub>N (130  $\mu$ L, 1.0 mmol) and SiPrCuI (29.1 mg, 0.05 mmol, 5 mol%). The crude product was chromatographed (10 g of silica, 15% EtOAc/*n*-hexanes) to give a colourless oil (318.7 mg, 96%).  $[\alpha]_D^{25} = 39.4$  (c 1.2, CHCl<sub>3</sub>); IR (film): 3373, 2975, 2933, 2871, 1599 cm<sup>-1</sup>; <sup>1</sup>H NMR (500 MHz, CDCl<sub>3</sub>): 7.47-7.40 (m, 2H), 7.32-7.27 (m, 3H), 4.06 (dd, *J* = 6.0, 5.6 Hz, 1H), 3.99-3.95 (m, 1H), 3.73 (br s, 1H), 3.23-3.17 (m, 2H), 1.26 (s, 9H), 1.18 (s, 9H); <sup>13</sup>C NMR (150 MHz, CDCl<sub>3</sub>): 131.7, 128.2, 128.1, 123.0, 86.9, 85.5, 82.8, 77.2, 77.0, 76.8, 76.0, 74.6, 74.0, 66.4, 62.9, 28.8, 28.5; HRMS (ESI) *m/z* calcd for C<sub>20</sub>H<sub>29</sub>NO<sub>3</sub>Na [M+Na]<sup>+</sup> 354.2040; found 354.2023. To further confirm the structure of **3a**, propargylic N-hydroxylamine was transformed to respective dihydroisoxazole by gold-catalyzed cyclization<sup>13</sup> (see below).

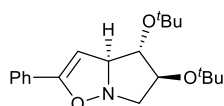

**(1S,2S,7aS)-1,2-Di-*tert*-butoxy-6-phenyl-2,3,5,7a-tetrahydro-1H-pyrrolizine** To a solution of propargylic N-hydroxylamine **3a** (149.2 mg, 0.45 mmol) in DCM (4.5 mL), AuCl<sub>4</sub>·2H<sub>2</sub>O (9.1 mg, 0.023 mmol, 5 mol%) and DMAP (16.5 mg, 30 mol%, 0.135 mmol) were added sequentially and the reaction mixture was heated under reflux for 2h under atmosphere of argon. Then solvent was evaporated and the residue was chromatographed on silica (20% Et<sub>2</sub>O/*n*-pentane) to give a light-yellow oil (118.5 mg, 79%).  $[\alpha]_D^{25} = 59.7$  (c 1.2, CHCl<sub>3</sub>); IR (film): 3438, 2974, 1685, 1651 cm<sup>-1</sup>; <sup>1</sup>H NMR (600 MHz, CDCl<sub>3</sub>): 7.51-7.46 (m, 2H), 7.34-7.27 (m, 3H), 5.26 (d, *J* = 1.8 Hz, 1H), 4.10-4.07 (m, 1H), 4.42-4.39 (m, 1H), 3.95-3.90 (m, 1H), 3.89 (dd, *J* = 5.9, 4.1 Hz, 1H), 3.62 (dd, *J* = 9.7, 5.6 Hz, 1H), 3.06 (dd, *J* = 9.4, 9.7 Hz, 1H), 1.21 (s, 9H), 1.16 (s, 9H); <sup>13</sup>C NMR (150 MHz, CDCl<sub>3</sub>): 152.8, 129.0, 128.8, 128.3, 125.6, 94.4, 80.9, 76.3, 74.0, 73.8, 61.1, 28.1, 28.5; HRMS (ESI) *m/z* calcd for C<sub>20</sub>H<sub>30</sub>NO<sub>3</sub> [M+H]<sup>+</sup> 332.2220; found 322.2217.

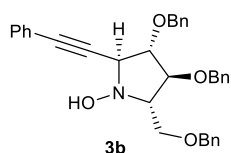

**(2S,3S,4S,5S)-3,4-Bis(benzyloxy)-2-[(benzyloxy)methyl]-5-(phenylethynyl)pyrrolidin-1-ol (3b)** was obtained according to general procedure using nitrone (**1b**) (208.8 mg, 0.5 mmol), phenylacetylene (**2a**) (66  $\mu$ L, 0.6 mmol), Et<sub>3</sub>N (70  $\mu$ L, 0.5 mmol) and SiPrCuI (14.5 mg, 0.025

mmol). The crude product was chromatographed on silica (15% EtOAc/*n*-hexanes) to give a colourless oil (244.5 mg, 94%).  $[\alpha]_D^{25} = -26.2$  (c 1.2, CHCl<sub>3</sub>); IR (film): 3370, 3031, 2865, 1953 cm<sup>-1</sup>; <sup>1</sup>H NMR (600 MHz, DMSO-*d*<sub>6</sub>): 8.30 (s, 1H), 7.42-7.24 (m, 20H), 4.67-4.47 (m, 6H), 4.29 (d, *J* = 4.3 Hz, 1H), 4.10-4.07 (m, 1H), 3.92 (dd, *J* = 5.8, 2.2 Hz, 1H), 3.70 (dd, *J* = 10.2, 3.7 Hz, 1H), 3.65 (dd, *J* = 10.2, 5.1 Hz, 1H), 3.30-3.26 (m, 1H); <sup>13</sup>C NMR (100 MHz, DMSO-*d*<sub>6</sub>): 138.9, 138.6, 138.2, 131.8, 129.1, 128.9, 128.7, 128.6, 128.6, 128.3, 128.1, 128.0, 127.9, 127.9, 127.8, 122.9, 87.5, 86.4, 86.0, 83.3, 79.6, 72.9, 71.4, 71.0, 69.5, 68.4, 62.0; HRMS (ESI) *m/z* calcd for C<sub>34</sub>H<sub>33</sub>NO<sub>4</sub>Na [M+Na]<sup>+</sup> 542.2302; found 542.2282.

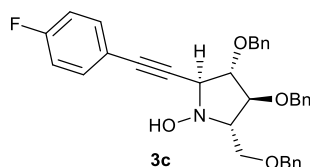

**(2S,3S,4S,5S)-3,4-bis(benzyloxy)-2-[(benzyloxy)methyl]-5-[(4-fluorophenyl)**

**ethynyl]pyrrolidin-1-ol (3c)** was obtained according to general procedure I using nitron **1b** (208.8 mg, 0.5 mmol), 1-ethynyl-4-fluorobenzene (**2b**) (69 μL, 0.6 mmol, 1.2 eq.), Et<sub>3</sub>N (70 μL, 0.5 mmol, 1.0 eq.) and SiPrCuI (14.5 mg, 0.025 mmol, 5 mol%). The crude product was chromatographed on silica (DCM) to give a colourless oil (263.9 mg, 98%).  $[\alpha]_D^{25} = -27.0$  (c 0.7, CHCl<sub>3</sub>); IR (film): 3371, 3064, 3031, 2923, 2865, 1600, 1506 cm<sup>-1</sup>; <sup>1</sup>H NMR (600 MHz, DMSO-*d*<sub>6</sub>): 8.32 (s, 1H), 7.48-7.44 (m, 2H), 7.38-7.26 (m, 15H), 7.24-7.18 (m, 2H), 4.67-4.47 (m, 6H), 4.29 (br s, 1H), 4.11-4.08 (m, 1H), 3.95-3.91 (m, 1H), 3.73-3.69 (m, 1H), 3.68-3.64 (m, 1H), 3.31-3.27 (m, 1H); <sup>13</sup>C NMR (150 MHz, DMSO-*d*<sub>6</sub>): 162.2 (d, *J*<sub>CF</sub> = 247.2 Hz), 138.9, 138.6, 138.2, 134.1 (d, *J*<sub>CF</sub> = 8.5 Hz), 128.7, 128.6, 128.3, 128.1, 127.9, 127.9, 127.8, 119.4 (d, *J*<sub>CF</sub> = 3.0 Hz), 116.3 (d, *J*<sub>CF</sub> = 22.1 Hz), 87.3, 86.4, 85.0, 83.3, 79.6, 71.4, 71.1, 69.5, 68.4, 62.0; <sup>19</sup>F NMR (470 MHz, CDCl<sub>3</sub>): -110.7. HRMS (ESI) *m/z* calcd for C<sub>34</sub>H<sub>32</sub>FNO<sub>4</sub>Na [M+Na]<sup>+</sup> 560.2208; found 560.2188.

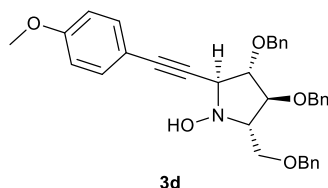

**(2S,3S,4S,5S)-3,4-bis(benzyloxy)-2-[(benzyloxy)methyl]-5-[(4-**

**methoxyphenyl)ethynyl]pyrrolidin-1-ol (3d)** was obtained according to general procedure

using nitron **1b** (208.8 mg, 0.5 mmol), 1-ethynyl-4-methoxybenzene (**2c**) (78  $\mu$ L, 0.6 mmol), Et<sub>3</sub>N (70  $\mu$ L, 0.5 mmol) and SiPrCuI (14.5 mg, 0.025 mmol). The crude product was chromatographed on silica (2% Et<sub>2</sub>O/DCM) to give a colourless oil (266.5 mg, 97%).  $[\alpha]_D^{25} = -28.8$  (c 1.0, CH<sub>3</sub>Cl); IR (film): 3392, 2923, 2222, 1606, 1510 cm<sup>-1</sup>; <sup>1</sup>H NMR (600 MHz, CDCl<sub>3</sub>): 8.26 (s, 1H), 7.38-7.24 (m, 17H), 6.96-6.90 (m, 2H), 4.64 (d, *J* = 12 Hz, 1H), 4.59-4.46 (m, 5H), 4.26 (d, *J* = 2.4 Hz, 1H), 4.10-4.05 (m, 1H), 3.91 (dd, *J* = 5.4, 2.4 Hz, 1H), 3.77 (s, 3H), 3.70 (dd, *J* = 10.2, 3.6 Hz, 1H), 3.65 (dd, *J* = 10.2, 4.8 Hz, 1H), 3.30-3.25 (m, 1H); <sup>13</sup>C NMR (150 MHz, DMSO)  $\delta$  159.7, 138.9, 138.6, 138.3, 133.3, 128.7, 128.6, 128.3, 128.0, 127.9, 127.9, 127.8, 115.0, 114.6, 86.5, 85.9, 85.8, 83.3, 79.6, 72.9, 71.3, 71.0, 69.4, 68.4, 62.1, 55.6; HRMS (ESI) *m/z* calcd for C<sub>35</sub>H<sub>35</sub>NO<sub>5</sub>Na [M+Na]<sup>+</sup> 572.2407; found: 572.2398.

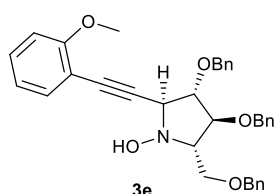

**(2S,3S,4S,5S)-3,4-bis(benzyloxy)-2-[(benzyloxy)methyl]-5-[(2-methoxyphenyl)ethynyl]pyrrolidin-1-ol (**3e**)** was obtained according to general procedure I using nitron **1b** (104.4 mg, 0.25 mmol), 1-ethynyl-2-methoxybenzene (**2d**) (39  $\mu$ L, 0.30 mmol), Et<sub>3</sub>N (35  $\mu$ L, 0.25 mmol) and SiPrCuI (7.6 mg, 0.013 mmol, 5 mol%). The crude product was chromatographed on silica (35% Et<sub>2</sub>O/*n*-pentane) to give a colourless oil (126.5 mg, 92%).  $[\alpha]_D^{25} = -41.8$  (c 1.0, CHCl<sub>3</sub>); IR (film): 3352, 3062, 3030, 2919, 2866, 1596, 1576, 1494, 1454 cm<sup>-1</sup>; <sup>1</sup>H NMR (600 MHz, DMSO-*d*<sub>6</sub>): 8.22 (s, 1H), 7.35-7.21 (m, 17H), 7.00 (d, *J* = 8.4 Hz, 1H), 6.91-6.86 (m, 1H), 4.65-4.43 (m, 6H), 4.25 (d, *J* = 3.0 Hz, 1H), 4.08-4.04 (m, 1H), 3.89 (dd, *J* = 6.0, 2.4 Hz, 1H), 3.75 (s, 3H), 3.67 (dd, *J* = 10.2, 3.8 Hz, 1H), 3.62 (dd, *J* = 10.2, 5.1 Hz, 1H), 3.35-3.29 (m, 1H); <sup>13</sup>C NMR (150 MHz, DMSO-*d*<sub>6</sub>): 160.2, 138.9, 138.6, 138.3, 133.7, 130.4, 128.7, 128.6, 128.6, 128.4, 128.1, 128.0, 127.9, 127.8, 120.8, 112.0, 111.8, 91.2, 86.5, 83.4, 72.9, 71.4, 71.0, 69.4, 68.4, 62.3, 56.0; HRMS (ESI) *m/z* calcd for C<sub>35</sub>H<sub>35</sub>NO<sub>5</sub>Na [M+Na]<sup>+</sup> 572.2407; found: 572.2431.

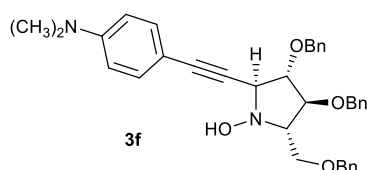

**(2S,3S,4S,5S)-3,4-Bis(benzyloxy)-2-[(benzyloxy)methyl]-5-[[4-(dimethylamino)phenyl]ethynyl]pyrrolidin-1-ol (3f)** was obtained according to general procedure I using nitrone **1b** (208.8 mg, 0.5 mmol), 4-ethynyl-*N,N*-dimethylaniline (**2e**) (87.1 mg, 0.6 mmol), Et<sub>3</sub>N (70  $\mu$ L, 0.5 mmol) and SiPrCuI (14.5 mg, 0.025 mmol, 5 mol%). The crude product was chromatographed on silica (1% Et<sub>3</sub>N in 40% Et<sub>2</sub>O/*n*-hexanes to 50% Et<sub>2</sub>O/hexanes) to give colourless oil (206.7 mg, 73%).  $[\alpha]_D^{25} = -40.0$  (c 0.9, CHCl<sub>3</sub>); IR (film): 3222, 3062, 3030, 2863, 2217, 1609, 1522 cm<sup>-1</sup>; <sup>1</sup>H NMR (600 MHz, DMSO-*d*<sub>6</sub>): 8.18 (s, 1H), 7.33-7.24 (m, 15H), 7.20-7.17 (m, 2H), 6.65-6.61 (m, 2H), 4.63-4.44 (m, 6H), 4.21 (d, *J* = 2.8 Hz, 1H), 4.04-4.01 (m, 1H), 3.87 (dd, *J* = 5.8, 2.2 Hz, 1H), 3.67 (dd, *J* = 10.3, 3.7 Hz, 1H), 3.61 (dd, *J* = 10.3, 5.1 Hz, 1H), 3.26-3.22 (m, 1H), 2.89 (s, 6H); <sup>13</sup>C NMR (150 MHz, DMSO-*d*<sub>6</sub>): 150.3, 132.8, 128.7, 128.6, 128.6, 128.3, 128.0, 127.9, 127.9, 127.8, 112.2, 109.4, 87.0, 86.6, 84.7, 83.3, 72.9, 71.3, 71.0, 69.4, 68.4, 62.2. HRMS (ESI) *m/z* calcd for C<sub>36</sub>H<sub>38</sub>N<sub>2</sub>O<sub>4</sub>Na [M+Na]<sup>+</sup> 585.2724; found: 585.2736.

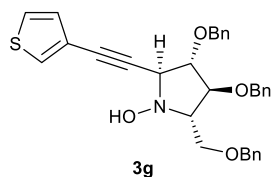

**(2S,3S,4S,5S)-3,4-Bis(benzyloxy)-2-[(benzyloxy)methyl]-5-(thiophen-3-ylethynyl)pyrrolidin-1-ol (3g)** was synthesized according to general procedure using nitrone **1b** (104.4 mg, 0.25 mmol), 3-ethynylthiophene (**2f**) (33  $\mu$ L, 0.30 mmol), Et<sub>3</sub>N (35  $\mu$ L, 0.25 mmol) and SiPrCuI (7.6 mg, 0.013 mmol). The crude product was chromatographed on silica (40% Et<sub>2</sub>O/*n*-pentane) to give a colourless oil (111.8 mg, 85%).  $[\alpha]_D^{25} = -13.9$  (c 2.0, DCM); IR (film): 3373, 2924, 2856, 2221, 1598, 1490, 1454 cm<sup>-1</sup>; <sup>1</sup>H NMR (600 MHz, DMSO-*d*<sub>6</sub>): 8.26 (s, 1H), 7.70-7.67 (m, 1H), 7.57-7.54 (m, 1H), 7.35-7.21 (m, 15H), 7.11-7.07 (m, 1H), 4.63-4.44 (m, 6H), 2.24 (d, *J* = 2.5 Hz, 1H), 4.06-4.02 (m, 1H), 3.88 (dd, *J* = 5.8, 2.1 Hz, 1H), 3.67 (dd, *J* = 10.2, 3.7 Hz, 1H), 3.62 (dd, *J* = 10.2, 5.0 Hz, 1H), 3.26-3.20 (m, 1H); <sup>13</sup>C NMR (150 MHz, DMSO-*d*<sub>6</sub>): 138.9, 138.6, 138.2, 130.1, 129.9, 128.7, 128.6, 128.3, 128.1, 127.9, 127.9, 127.8, 127.1, 121.8, 86.8, 86.4, 83.2, 81.4, 72.9, 71.4, 71.1, 69.4, 68.4, 62.1. HRMS (ESI) *m/z* calcd for C<sub>32</sub>H<sub>31</sub>SNO<sub>4</sub>Na [M+Na]<sup>+</sup> 548.1866; found 548.1882.

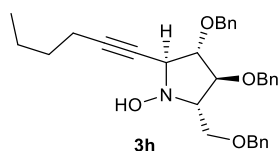

**(2S,3S,4S,5S)-3,4-bis(Benzyloxy)-2-[(benzyloxy)methyl]-5-(hex-1-yn-1-yl)pyrrolidin-1-ol (3h)**

was obtained according to modified general procedure using nitron **1b** (208.8 mg, 0.5 mmol), hex-1-yn (**2i**) (230  $\mu$ L, 2.0 mmol, 4.0 eq), TMG (63  $\mu$ L, 0.5 mmol, 1.0 eq) and SiPrCuI (14.5 mg, 0.025 mmol, 5 mol%). The crude product was chromatographed on silica (15% Et<sub>2</sub>O/*n*-hexanes) to give a colourless oil (204.3 mg, 82%).  $[\alpha]_D^{25} = -5.2$  (c 1.4, CHCl<sub>3</sub>); IR (film): 3377, 3063, 3030, 2955, 2930, 2869, 1496, 1454 cm<sup>-1</sup>; <sup>1</sup>H NMR (600 MHz, DMSO-*d*<sub>6</sub>): 8.05 (s, 1H), 7.35-7.20 (m, 15H), 4.58-4.42 (m, 6H), 3.98 (d, *J* = 1.8 Hz, 1H), 3.91-3.88 (m, 1H), 3.81 (dd, *J* = 6.0, 2.0 Hz, 1H), 3.64 (dd, *J* = 10.2, 3.7 Hz, 1H), 3.58 (dd, *J* = 10.2, 5.1 Hz, 1H), 3.19-3.14 (m, 1H), 2.20-2.14 (m, 2H), 1.42-1.31 (m, 4H), 0.82 (t, *J* = 7.2 Hz, 3H); <sup>13</sup>C NMR (150 MHz, DMSO-*d*<sub>6</sub>): 139.0, 138.7, 138.3, 128.7, 128.6, 128.6, 128.3, 128.0, 128.0, 127.9, 127.8, 86.7, 86.4, 83.3, 77.6, 72.9, 71.2, 71.1, 69.1, 68.4, 61.7, 30.8, 21.7, 18.3, 13.9; HRMS (ESI) *m/z* calcd. for C<sub>32</sub>H<sub>37</sub>NO<sub>4</sub>Na [M+Na]<sup>+</sup> 522.2615; found: 522.2613.

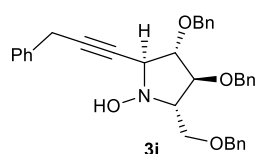

**(2S,3S,4S,5S)-3,4-bis(benzyloxy)-2-[(benzyloxy)methyl]-5-(3-phenylprop-1-yn-1-yl)pyrrolidin-1-ol (3i)**

was obtained according to general procedure I using nitron **1b** (104.4 mg, 0.25 mmol), prop-2-yn-1-ylbenzene (**2j**) (37  $\mu$ L, 0.30 mmol), TMG (31  $\mu$ L, 0.25 mmol) and SiPrCuI (7.6 mg, 0.013 mmol). The crude product was chromatographed on silica (35% Et<sub>2</sub>O/*n*-pentane) to give a colourless oil (106.0 mg, 79%).  $[\alpha]_D^{25} = 1.9$  (c 1.2, CHCl<sub>3</sub>); dr >95:5 based on HPLC (40% MTBE/hexanes; 1 mL/min., IA column, DAD detector, 244 nm): major peak 12.8 min (purity >95% based on HPLC); IR (film): 3376, 3062, 3030, 2922, 2865, 1549, 1453 cm<sup>-1</sup>; <sup>1</sup>H NMR (600 MHz, DMSO-*d*<sub>6</sub>): 8.16 (s, 1H), 7.37-7.16 (m, 20H), 4.59-4.43 (m, 6H), 4.08 (d, *J* = 1.9 Hz, 1H), 3.98-3.96 (m, 1H), 3.84 (dd, *J* = 6.0, 1.9 Hz, 1H), 3.68 (s, 2H), 3.65 (dd, *J* = 10.3, 3.1 Hz, 1H), 3.60 (dd, *J* = 10.3, 5.0 Hz, 1H), 3.24-3.19 (m, 1H); <sup>13</sup>C NMR (150 MHz, DMSO-*d*<sub>6</sub>): 138.9, 138.6, 138.2, 137.2, 128.7, 128.7, 128.6, 128.6, 128.3, 128.2, 128.0, 127.9, 127.9, 127.8, 126.8,

86.5, 84.2, 83.4, 79.7, 72.9, 71.2, 71.1, 69.3, 68.4, 61.7, 24.7; HRMS (ESI)  $m/z$  calcd for  $C_{35}H_{35}NO_4Na$   $[M+Na]^+$  556.2458; found 556.2456.

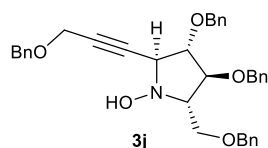

**(2S,3S,4S,5S)-3,4-bis(benzyloxy)-2-[(benzyloxy)methyl]-5-[3-(benzyloxy)prop-1-yn-1-yl]pyrrolidin-1-ol (3j)** was obtained according to general procedure using nitrone **1b** (104.4 mg, 0.25 mmol), ((prop-2-yn-1-yloxy)methyl)benzene (**2k**) (43.9 mg, 0.30 mmol, 1.2 eq.), TMG (31  $\mu$ L, 0.25 mmol, 1.0 eq.) and SiPrCuI (7.6 mg, 0.013 mmol, 5 mol%). The crude product was chromatographed on silica (40% Et<sub>2</sub>O/*n*-pentane) to give a colourless oil (86.8 mg, 62%).  $[\alpha]_D^{25} = -4.2$  (c 0.9, DCM); dr >95:5 based on HPLC (40% MTBE/hexanes; 1 mL/min., IA column, DAD detector): major peak 19.4 min (purity >95% based on HPLC, DAD detector 206 nm); IR (film): 3380, 3062, 3030, 2864, 1496, 1454  $cm^{-1}$ ; <sup>1</sup>H NMR (600 MHz, benzene-*d*<sub>6</sub>): 7.29-7.18 (m, 7H), 7.14-6.98 (m, 13H), 6.94 (br s, 1H), 4.51-4.47 (m, 3H), 4.46-4.34 (m, 4H), 4.30-4.21 (m, 3H), 4.16 (dd,  $J = 6.0, 2.4$  Hz, 1H), 4.00 (d,  $J = 1.9$  Hz, 2H), 3.78-3.70 (m, 2H), 3.66 (dd,  $J = 9.6, 3.6$  Hz, 1H); <sup>13</sup>C NMR (150 MHz, benzene-*d*<sub>6</sub>): 138.4, 138.4, 138.0, 138.0, 128.2, 128.2, 128.1, 128.0, 127.8, 127.6, 127.4, 127.3, 127.3, 86.8, 83.3, 83.1, 82.7, 73.0, 71.7, 71.0, 69.6, 67.9, 62.2, 57.2. HRMS (ESI)  $m/z$  calcd for  $C_{36}H_{37}NO_5Na$   $[M+Na]^+$  586.2564; found 586.2581.

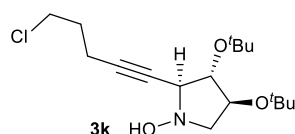

**(2S,3S,4S)-3,4-di-tert-butoxy-2-(5-chloropent-1-yn-1-yl)pyrrolidin-1-ol (3k)** was obtained according to general procedure (procedure A) using nitrone **1a** (229.0 mg, 1.0 mmol), 5-chloropent-1-yne (**2l**) (127  $\mu$ L, 1.2 mmol), TMG (126  $\mu$ L, 1.0 mmol, 1.0 mmol) and SiPrCuI (29.0 mg, 0.05 mmol, 5 mol%). The crude product was chromatographed on silica (30% Et<sub>2</sub>O/*n*-pentane) to give a colourless oil (208.9 mg, 63%).  $[\alpha]_D^{25} = 54.1$  (c 0.6, CH<sub>3</sub>Cl); IR (film): 3381, 2975, 2934, 2871  $cm^{-1}$ ; <sup>1</sup>H NMR (600 MHz, DMSO-*d*<sub>6</sub>): 8.13 (s, 1H), 3.81-3.76 (m, 1H), 3.74-3.69 (m, 3H), 3.17 (br s, 1H), 2.88 (br d,  $J = 4.6$  Hz, 2H), 2.35 (t,  $J = 6.6$  Hz, 1H), 2.35 (t,  $J = 6.6$  Hz, 1H), 1.90-1.83 (m, 2H), 1.16 (s, 9H), 1.10 (s, 9H); <sup>13</sup>C NMR (150 MHz, CDCl<sub>3</sub>): 82.9, 75.8, 73.9, 73.6, 65.6, 63.6, 44.5, 31.6, 29.1, 28.7, 25.6, 23.9, 16.1; HRMS (ESI)  $m/z$  calcd for  $C_{17}H_{30}NO_3ClNa$   $[M+Na]^+$  354.1812; found 354.1816.



Procedure B To a solution of alane [prepared by heating trimethylaluminum (0.2 mL, 2.09 mmol); alkyne **2a** (221  $\mu$ L, 2.09 mmol) and Et<sub>3</sub>N (29  $\mu$ L, 10 mol%, 0.01 mmol) at 60 °C for 6 h in hexanes (3 mL), as previously described<sup>14]</sup> in anhydrous hexane (4 mL), a solution of nitron (114.7 mg, 0.5 mmol) in anhydrous THF (8 mL) was added dropwise at rt, and stirred at this temperature for 16 h. Then reaction mixture was quenched with sat. solution of Rochelle salt (10 mL) and extracted with DCM (3 x 10 mL). The combined organic extracts were dried over Na<sub>2</sub>SO<sub>4</sub> and evaporated. The residue was chromatographed on silica (40% Et<sub>2</sub>O/*n*-pentane) to give colourless oil (142.6 mg, 85%). Dr 87:13 based on <sup>1</sup>H NMR: major isomer 3.33 ppm(t), minor isomer 3.48 ppm (t).

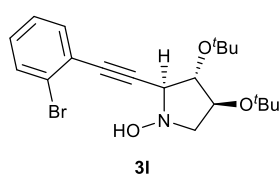

**(2S,3S,4S)-2-[(2-Bromophenyl)ethynyl]-3,4-di-*tert*-butoxypyrrolidin-1-ol (3I)** was obtained according to general procedure (procedure A) using nitron **1a** (917.3 mg, 4.0 mmol), 1-ethynyl-2-bromobenzene (**2m**) (869.0 mg, 4.8 mmol), Et<sub>3</sub>N (0.56 mL, 4.0 mmol) and SiPrCuI (46.5 mg, 0.08 mmol, 2 mol%). The crude product was chromatographed on silica (35% Et<sub>2</sub>O/*n*-pentane) to give a light-yellow oil (1.51 g, 92%). [ $\alpha$ ]<sub>D</sub><sup>25</sup> = 36.7 (c 1.1, CH<sub>3</sub>Cl); dr >95:5 based on HPLC (40% MTBE/hexanes; 1 mL/min., IA column, DAD detector, 204 nm): major peak 6.6 min., minor peak 7.7 min (purity >95% based on HPLC); IR (film): 3369, 2975, 2933, 2871, 1471cm<sup>-1</sup>; <sup>1</sup>H NMR (600 MHz, DMSO-*d*<sub>6</sub>): 8.32 (br s, 1H), 7.70-7.67 (m, 1H), 7.55-7.52 (m, 1H), 7.41-7.37 (m, 1H), 7.32-7.28 (m, 1H), 3.93-3.86 (m, 2H), 3.51 (br d, *J* = 4.2 Hz, 1H), 3.02-2.95 (m, 2H), 1.20 (s, 9H), 1.12 (s, 9H); <sup>13</sup>C NMR (150 MHz, CDCl<sub>3</sub>): 134.1, 132.9, 130.6, 128.2, 124.9, 124.8, 94.1, 82.9, 79.6, 76.0, 74.2, 73.8, 66.3, 63.7, 29.1, 28.7. HRMS (ESI) *m/z* calcd for C<sub>20</sub>H<sub>28</sub>NO<sub>3</sub>BrNa [M+Na]<sup>+</sup>: 432.1145; found: 432.1128.

Procedure B To a solution of alane [prepared by heating trimethylaluminum (0.2 mL, 2.09 mmol); alkyne (377.6 mg, 2.08 mmol) and Et<sub>3</sub>N (29  $\mu$ L, 10 mol%, 0.01 mmol) at 60 °C for 6 h in hexane (3 mL), as previously described<sup>14]</sup> in anhydrous hexanes (4 mL), a solution of nitron (114.7 mg, 0.5 mmol) in anhydrous THF (8 mL) was added dropwise at rt, and stirred at this temperature for 10 h (TLC analysis indicated presence of two product R<sub>f</sub> = 0.40 and 0.36, 40% Et<sub>2</sub>O/*n*-pentane). Then reaction mixture was quenched with sat. solution of Rochelle salt (10 mL) and extracted with DCM (3 x 10 mL). The combined organic extracts were dried over

Na<sub>2</sub>SO<sub>4</sub> and evaporated. The residue was chromatographed on silica (35% Et<sub>2</sub>O/*n*-pentane) to give light yellow oil (159.6 mg, 78%). Dr 88:12 based on HPLC (40% MTBE/hexanes; 1 mL/min., IA column, DAD detector, 204 nm): major peak 6.6 min. (Purity 94% based on HPLC).

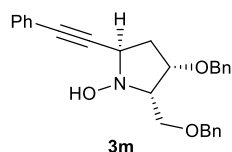

**(2S,3S,5R)-3-(benzyloxy)-2-[(benzyloxy)methyl]-5-(phenylethynyl)pyrrolidin-1-ol (3m)** was obtained according to general procedure (procedure A) using nitron **1d** (155.7 mg, 0.5 mmol), phenylacetylene (**2a**) (61.3 mg, 0.6 mmol), Et<sub>3</sub>N (70 μL, 0.5 mmol) and SiPrCuI (12.2 mg, 0.025 mmol, 5 mol%). The crude product was chromatographed on silica (35% Et<sub>2</sub>O/*n*-pentane) to give a light-yellow oil (195.2 mg, 94%).  $[\alpha]_D^{25} = 48.8$  (c 1.3, CH<sub>3</sub>Cl); dr >95:5 based on HPLC (40% MTBE/hexanes; 1 mL/min., IA column, DAD detector, 244 nm): major peak 29.0 min., minor peak 34.5 min. (purity >95% based on HPLC) IR (film): 3364, 3031, 2866, 2229 1490 cm<sup>-1</sup>; <sup>1</sup>H NMR (600 MHz, CDCl<sub>3</sub>): 7.44-7.39 (m, 2H), 7.36-7.25 (m, 13H), 5.15 (br s, 1H), 4.62-4.46 (m, 5H), 4.34-4.28 (m, 1H), 3.96 (dd, *J* = 9.3, 7.3 Hz, 1H), 3.84 (dd, *J* = 9.3, 5.5 Hz, 1H), 3.54-3.48 (m, 1H), 2.44 (ddd, *J* = 13.3, 7.7, 2.6 Hz, 1H), 2.27-2.18 (m, 1H); <sup>13</sup>C NMR (151 MHz, cdcl<sub>3</sub>) δ 138.2, 138.2, 131.8, 128.4, 128.3, 128.2, 127.8, 127.6, 127.5, 127.4, 125.6, 122.5, 86.6, 86.2, 75.6, 73.6, 71.1, 68.1, 67.9, 57.4, 36.9.; HRMS (ESI) *m/z* calcd for C<sub>27</sub>H<sub>27</sub>NO<sub>3</sub>Na [M+Na]<sup>+</sup> 436.1883; found 436.1862.

Procudure B: To a solution of alkynylalane [prepared by heating trimethylaluminum (0.2 mL, 2.09 mmol); alkyne **2a** (229.1 μL, 2.09 mmol) and Et<sub>3</sub>N (29 μL, 10 mol%, 0.01 mmol) at 60 °C for 6h in hexane (3 mL), as previously described<sup>14</sup>] in hexane (3 mL), the solution of nitron **1d** (155.7 mg, 0.5 mmol) in anhydrous THF (10 mL) was added dropwise at rt, and stirred for 16h at this temp. Then reaction mixture was quenched with sat. solution of NH<sub>4</sub>Cl (20 mL) and extracted with DCM (3 x 15 mL). The combined organic extracts were dried over Na<sub>2</sub>SO<sub>4</sub> and evaporated. The residue was chromatographed on silica (35% Et<sub>2</sub>O/*n*-pentane) to give a colourless oil (157.1 mg, 76%). dr >95:5 based on HPLC (40% MTBE/hexanes; 1 mL/min., IA column, DAD detector, 244 nm): major peak 29.0 min., minor peak 34.5 min. (purity >95% based on HPLC).

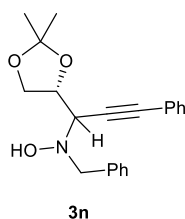

**3-[benzyl(hydroxy)amino]-3,4,5-trideoxy-1,2-*O*-(1-methylethylidene)-5-phenyl-D-erythro-pent-4-ynitol (3n)** was obtained according to general procedure using nitron **1c** (188.2 mg, 0.80 mmol), phenylacetylene (**2a**) (105  $\mu$ L, 0.96 mmol), Et<sub>3</sub>N (112  $\mu$ L, 0.80 mmol, 1.0 eq.) and SiPrCuI (23.2 mg, 0.04 mmol, 5 mol%). The crude product was chromatographed on silica (40% Et<sub>2</sub>O/*n*-pentane) to give a colourless oil (255.1 mg, 95%).  $[\alpha]_D^{25} = 55.8$  (c 1.0, CHCl<sub>3</sub>); IR (film): 3403, 3061, 3031, 2986, 2933, 2886, 1598, 1491, 1455 cm<sup>-1</sup>; <sup>1</sup>H NMR (600 MHz, DMSO-*d*<sub>6</sub>): 8.06 (s, 1H), 7.49-7.48 (m, 2H), 7.40-7.28 (m, 7H), 7.26-7.21 (m, 1H), 4.32-4.27 (m, 1H), 4.09 (dd, *J* = 8.6, 6.3 Hz, 1H), 4.03-3.98 (m, 3H), 3.89 (d, *J* = 13.1 Hz, 1H), 1.33 (s, 3H), 1.29 (s, 3H); <sup>13</sup>C NMR (150 MHz, DMSO-*d*<sub>6</sub>): 138.4, 131.9, 129.7, 129.1, 129.0, 128.5, 127.5, 122.9, 108.6, 87.2, 85.2, 76.7, 67.1, 62.1, 62.0, 26.9, 26.3; HRMS (ESI) *m/z* calcd. for C<sub>21</sub>H<sub>24</sub>NO<sub>3</sub> [M+H]<sup>+</sup> 338.1751; found 338.1757.

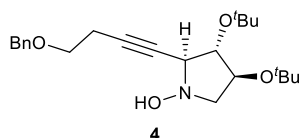

**(2*S*,3*S*,4*S*)-2-[4-(2-benzyloxy)but-1-yn-1-yl]-3,4-di-*tert*-butoxypyrrolidin-1-ol (4)** Procedure A To a suspension of nitron **1a** (458.6 mg, 2.0 mmol) in degassed water (10 mL), alcohol **8** (640.9 mg, 4.0 mmol), SiPrCuI (116.2 mg, 10 mol%, 0.2 mmol), and TMG (0.25 mL, 2.0 mmol) were added as follow and stirred for 16 h at 50 °C (temp. oil bath). Then reaction mixture was extracted with Et<sub>2</sub>O (3 x 10 mL). The combined extracts were washed with brine (1 x 20 mL), dried over Na<sub>2</sub>SO<sub>4</sub> and the solvent was evaporated. The residue was chromatographed on silica (50 g, 45% Et<sub>2</sub>O/*n*-pentane) to give a yellow oil (514.5 mg, 66%).  $[\alpha]_D^{25} = 28.7$  (c 2.1, CH<sub>3</sub>Cl); IR (film): 3381, 2975, 1455 cm<sup>-1</sup>; dr 89:11 (based on <sup>1</sup>H NMR, major diastereomer 3.51 ppm (t), 3.59 ppm (t); <sup>1</sup>H NMR (500 MHz, DMSO-*d*<sub>6</sub>): 8.14 (s, 1H), 7.38-7.26 (m, 5H), 4.50 (s, 2H), 3.82-3.77 (m, 1H), 3.73 (dd, *J* = 6.5, 3.5 Hz, 1H), 3.51 (t, *J* = 6.8 Hz, 2H), 3.20-3.12 (m, 1H), 2.92-2.85 (m, 2H), 2.48 (dd, *J* = 6.5, 1.9 Hz, 1H), 1.14 (s, 9H), 1.10 (s, 9H); <sup>13</sup>C NMR (125 MHz, DMSO-*d*<sub>6</sub>): 138.8, 128.6, 127.9, 127.8, 82.9, 75.8, 73.9, 73.7, 72.2, 68.4, 65.7, 29.1, 28.7, 20.0; HRMS (ESI) *m/z* calcd for C<sub>23</sub>H<sub>35</sub>NO<sub>4</sub>Na [M+Na]<sup>+</sup> 412.2458; found 412.2464.

Table 1. Optimization of the addition of alcohol **8** to nitron **1a**

| Alcohol <b>8</b> (eq.) | SiPrCuI (mol%) | Base              | Temp. (°C), time (16h) | Yield (%) |
|------------------------|----------------|-------------------|------------------------|-----------|
| 1                      | 5              | Et <sub>3</sub> N | rt                     | 11        |
| 1                      | 10             | Et <sub>3</sub> N | rt                     | 18        |
| 1                      | 10             | TMG               | rt                     | 27        |
| 2                      | 10             | TMG               | 65                     | 39        |
| 2                      | 10             | TMG               | 50                     | 66        |

Procedure B To a solution of alkyne **8** (240.0 mg, 1.5 mmol, 3.0 eq.) in THF (10 mL), cooled to -40 °C, a solution of *n*-BuLi (0.6 mL, 1.5 mmol) was added dropwise within 5 min. and stirred for 30 min. at this temp. Then solution of nitron **1a** (114.7 mg, 0.5 mmol) in anhydrous THF (5 mL) was added dropwise. After 1h, cooling bath was removed and the reaction mixture was allowed to warm to rt. Then reaction was quenched with sat. solution of NH<sub>4</sub>Cl (20 mL), and extracted with Et<sub>2</sub>O (3 x 10 mL). The combined organic extracts were washed with brine (1 x 20 mL), dried over Na<sub>2</sub>SO<sub>4</sub>, and evaporated to give a light-yellow oil (176.1 mg, 90%, dr >95:5 based <sup>1</sup>H NMR).

Procedure C To a solution of alkynylalane [prepared by heating trimethylaluminum (0.2 mL, 2.09 mmol); alkyne **8** (302.2 mg, 1.88 mmol) and Et<sub>3</sub>N (29 µL, 10 mol%, 0.01 mmol) at 60 °C for 6h in hexane (3 mL), as previously described<sup>14</sup>], the solution of nitron **1a** (114.7 mg, 0.5 mmol) in anhydrous THF (10 mL) was added dropwise at rt, and stirred for 6h at this temp. Then reaction mixture was quenched with sat. solution of NH<sub>4</sub>Cl (20 mL) and extracted with DCM (3 x 10 mL). The combined organic extracts were dried over Na<sub>2</sub>SO<sub>4</sub> and evaporated. The residue was chromatographed on silica (40% Et<sub>2</sub>O/*n*-pentane) to give a colourless oil (57.2 mg, 29% dr >92:8 based <sup>1</sup>H NMR).

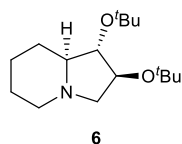

#### (1S,2S,8aS)-1,2-di-*tert*-Butoxyoctahydroindolizine (**6**)

A solution of propargylic N-hydroxyl amine **4** (109.9 mg, 0.28 mmol) in MeOH (20 mL) and Pd(OH)<sub>2</sub>/C (39.3 mg, 20% Degussa type) was stirred under hydrogen (50 bar) for 16h at rt. Then reaction mixture was filtered through a small pad of celite, washed with MeOH, and

evaporated. The crude aminoalcohol **5** (74.3 mg) was used in the next step without further purification.

To a solution of crude aminoalcohol **5** (74.3 mg) in a mixture of anhydrous CCl<sub>4</sub> (2.4 mL) and DCM (2.4 mL), Et<sub>3</sub>N (70  $\mu$ L) and polymer-supported PPh<sub>3</sub> (306 mg, 0.49 mmol, 1.6 mmol/g, 200-400 mesh) were added and vigorously shaken under atmosphere of argon for 24h at rt. Then reaction mixture was filtered through Schott funnel (porosity G3) and the residual resin was successively washed with DCM (2  $\times$  4 mL), MeOH (2  $\times$  4 mL), DCM (2  $\times$  4 mL) and MeOH (2  $\times$  4 mL). Then solvents were evaporated and the crude product was chromatographed on silica (50% Et<sub>2</sub>O/ hexanes) to give a colourless oil (49.4 mg, 75% after two steps).  $[\alpha]_D^{25} = 42.0$  (c 0.54, CH<sub>3</sub>Cl) lit.<sup>15</sup>  $[\alpha]_D^{25} = 42.8$  (c 0.48, CH<sub>3</sub>Cl); IR (film): 2975, 2934, 1648 cm<sup>-1</sup>; <sup>1</sup>H NMR (600 MHz, CDCl<sub>3</sub>): 3.78-3.73 (m, 1H), 3.60 (dd, *J* = 8.4, 4.2 Hz, 1H), 2.95-2.84 (m, 2H), 2.54-2.33 (m, 1H), 1.93-1.81 (m, 2H), 1.79-1.45 (m, 6H), 1.17 (s, 9H), 1.14 (s, 9H); <sup>13</sup>C NMR (150 MHz, CDCl<sub>3</sub>): 83.7, 76.8, 73.7, 73.5, 67.0, 62.1, 53.6, 29.2, 29.0, 28.7, 28.5, 24.8, 24.1; HRMS (ESI) *m/z* calcd for C<sub>16</sub>H<sub>31</sub>NO<sub>2</sub>Na [M+Na]<sup>+</sup> 292.2247; found 292.2253. The <sup>1</sup>H NMR, <sup>13</sup>C NMR and optical rotation were in agreement with those reported.<sup>15</sup>

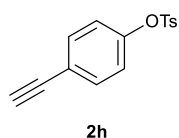

**4-Ethynylphenyl 4-methylbenzenesulfonate (2h)** To a suspension of K<sub>2</sub>CO<sub>3</sub> (2.21 g, 16.0 mmol, 2.0 eq) in anhydrous MeOH (30 mL), cooled to 0 °C, tosyl-protected 4-hydroxybenzaldehyde (2.21 mmol, 8.0 mmol) was added. Next, Bestmann-Ohira reagent (1.68 g, 9.6 mmol, 1.2 mmol) was added dropwise by means of syringe, and the reaction mixture was stirred for 16h at rt. Then reaction mixture was diluted with Rochelle salt sat. solution (30 mL) and water (50 mL). After 15 min. of stirring, the aqueous phase was separated and extracted with EtOAc (3 x 30 mL). The combined organic extracts were washed with brine (2 x 30 mL), dried over MgSO<sub>4</sub>, and evaporated. The residue was chromatographed on silica (5% EtOAc/*n*-hexanes) to give alkyne **2h** as a white solid (1.38 g, 62%). 7.71-7.76 (m, 2H), 7.42-7.37 (m, 2H), 7.33-7.28 (m, 2H), 7.02-6.80 (m, 2H), 3.09 (s, 1H), 2.44 (s, 3H); <sup>13</sup>C NMR (100 MHz, CDCl<sub>3</sub>): 149.6, 145.6, 133.4, 132.0, 129.8, 128.5, 122.5, 121.1, 82.2, 78.3, 21.7.

## References:

1. B. P. Machin and B. L. Pagenkopf, *Synlett*, 2011, 2799.
2. I. N. Michaelides, B. Darses and D. J. Dixon, *Org. Lett.*, 2011, **13**, 664.
3. O. Santoro, A. Collado, A. M. Z. Slawin, S. P. Nolan and C. S. J. Cazin, *Chem. Commun.*, 2013, **49**, 10483.
4. S. Díez-González, A. Correa, L. Cavallo and S. P. Nolan, *Chem. – Eur. J.*, 2006, **12**, 7558.
5. J. Broggi, S. Díez-González, J. L. Petersen, S. Berteina-Raboin, S. P. Nolan and L. A. Agrofoglio, *Synthesis*, 2008, 141.
6. S. Díez-González, E. C. Escudero-Adan, J. Benet-Buchholz, E. D. Stevens, A. M. Z. Slawin and S. P. Nolan, *Dalton Trans.*, 2010, **39**, 7595.
7. S. Díez-González and S. P. Nolan, *Angew. Chem. Int. Ed.*, 2008, **47**, 8881.
8. S. Díez-González, N. M. Scott and S. P. Nolan, *Organometallics*, 2006, **25**, 2355.
9. S. Cicchi, I. Hold and A. Brandi, *J. Org. Chem.*, 1993, **58**, 5274.
10. W.-B. Wang, M.-H. Huang, Y.-X. Li, P.-X. Rui, X.-G. Hu, W. Zhang, J.-K. Su, Z.-L. Zhang, J.-S. Zhu, W.-H. Xu, X.-Q. Xie, Y.-M. Jia and C.-Y. Yu, *Synlett*, 2010, 488.
11. S. Stecko, M. Michalak, M. Stodulski, Ł. Mucha, K. Parda, B. Furman and M. Chmielewski, *Synthesis*, 2012, **44**, 2695.
12. M. Maciejko, S. Stecko, O. Staszewska-Krajewska, M. Jurczak, B. Furman and M. Chmielewski, *Synthesis*, 2012, **44**, 2825.
13. O. Debleds, C. D. Zotto, E. Vrancken, J.-M. Campagne and P. Retailleau, *Adv. Synth. Catal.*, 2009, **351**, 1991.
14. C. Pillard, V. Desvergnés and S. Py, *Tetrahedron Lett.*, 2007, **48**, 6209.
15. A. Goti, F. Cardona and A. Brandi, *Synlett*, 1996, 761.

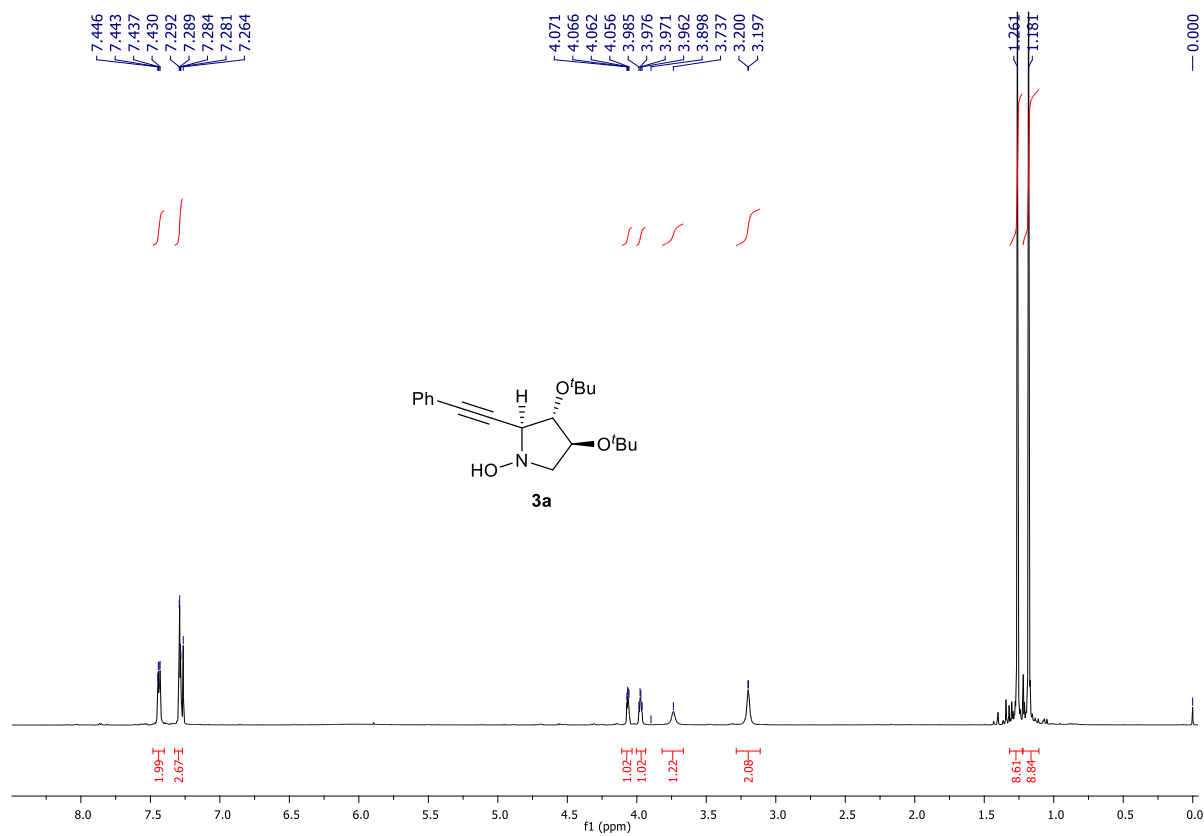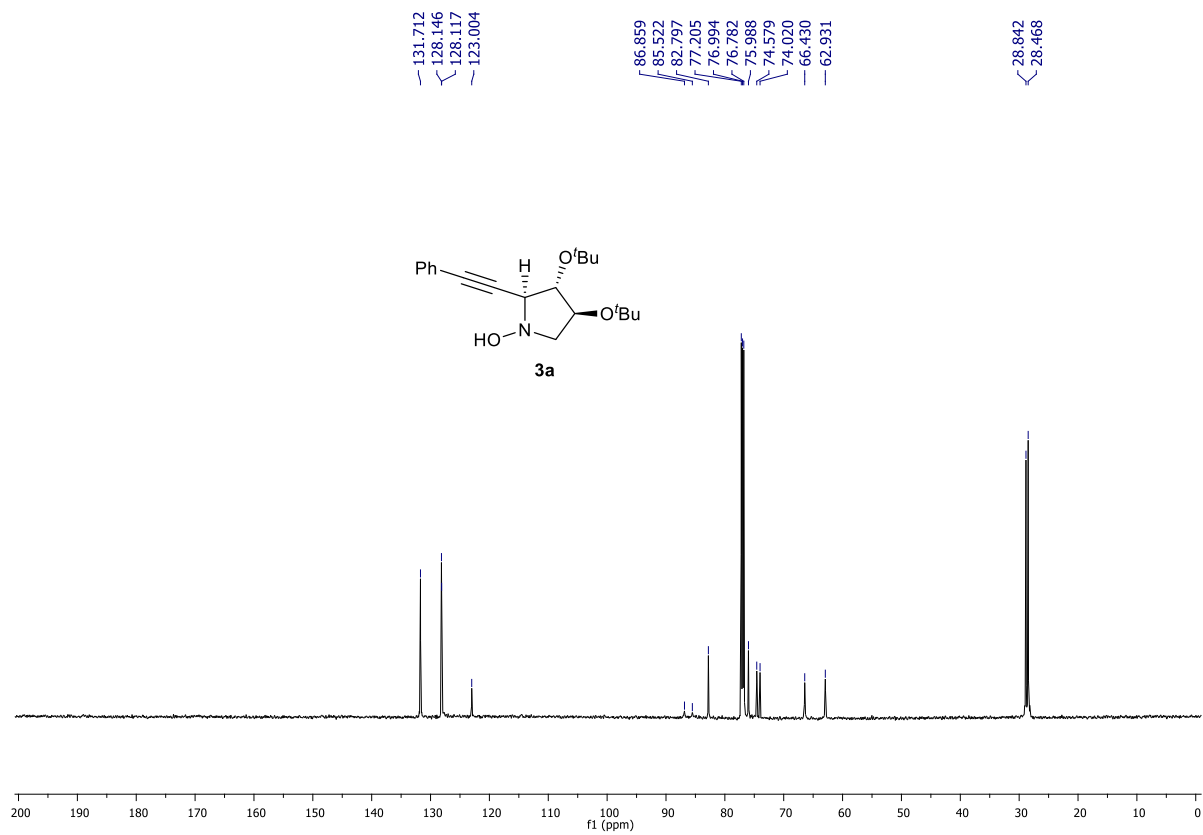

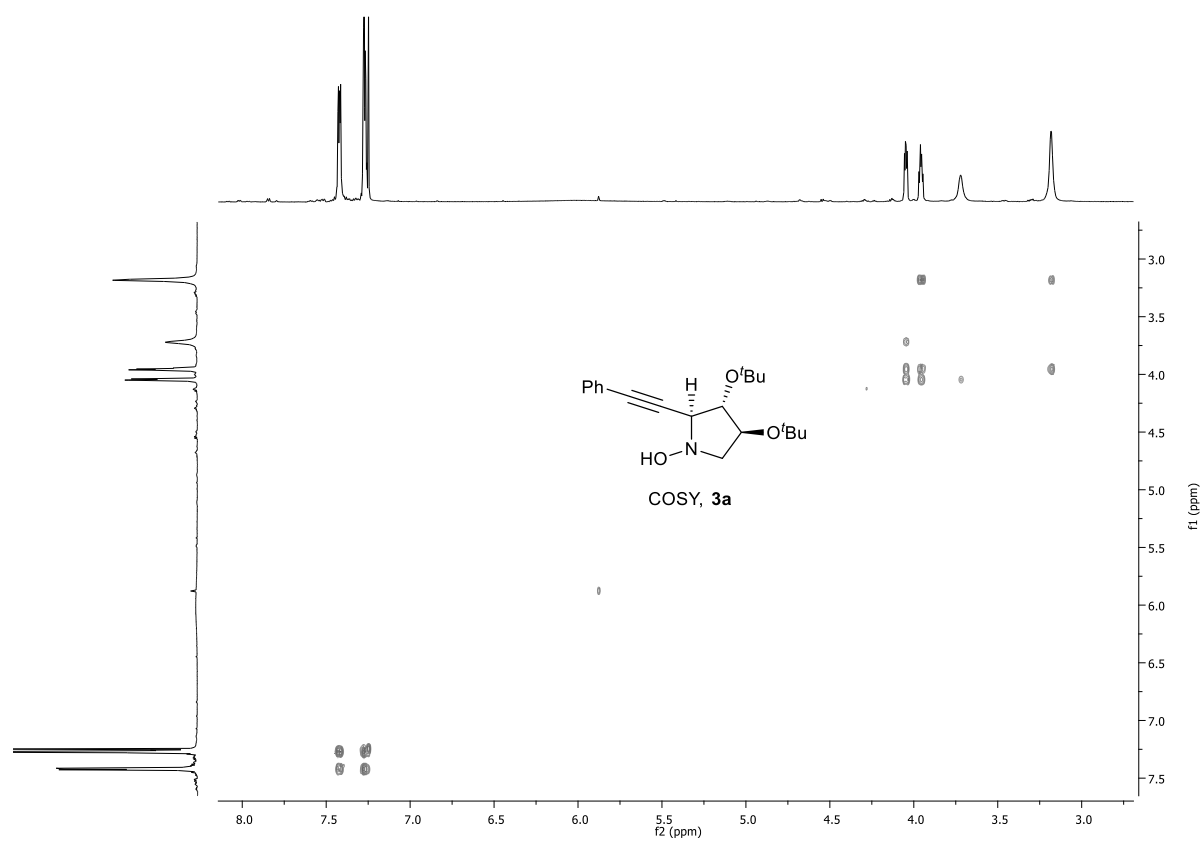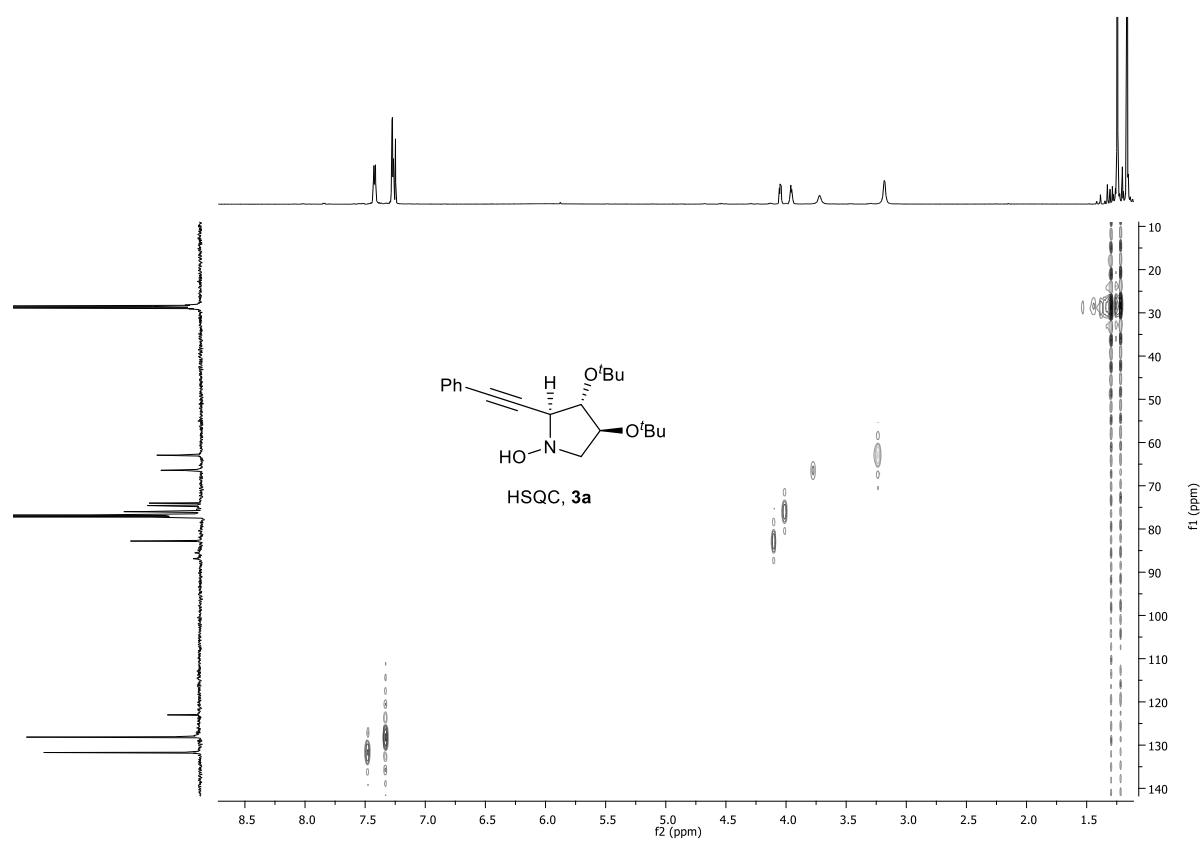



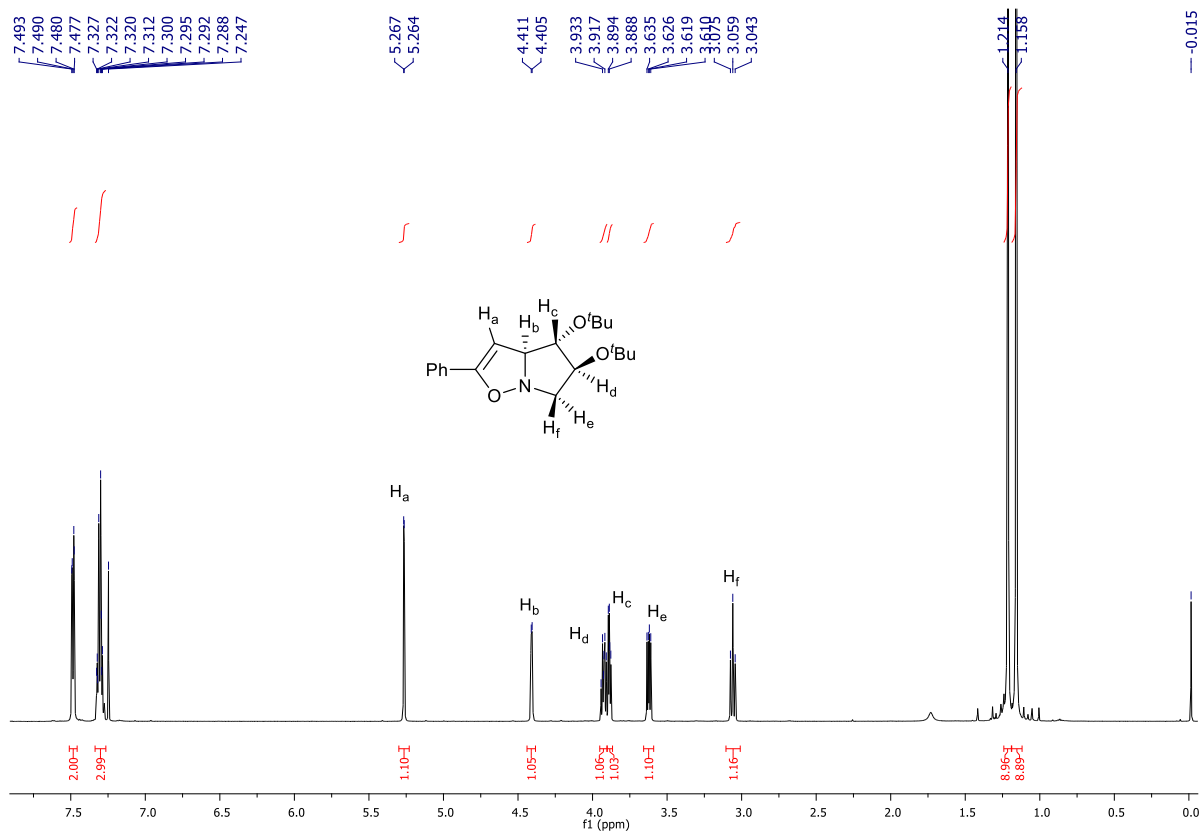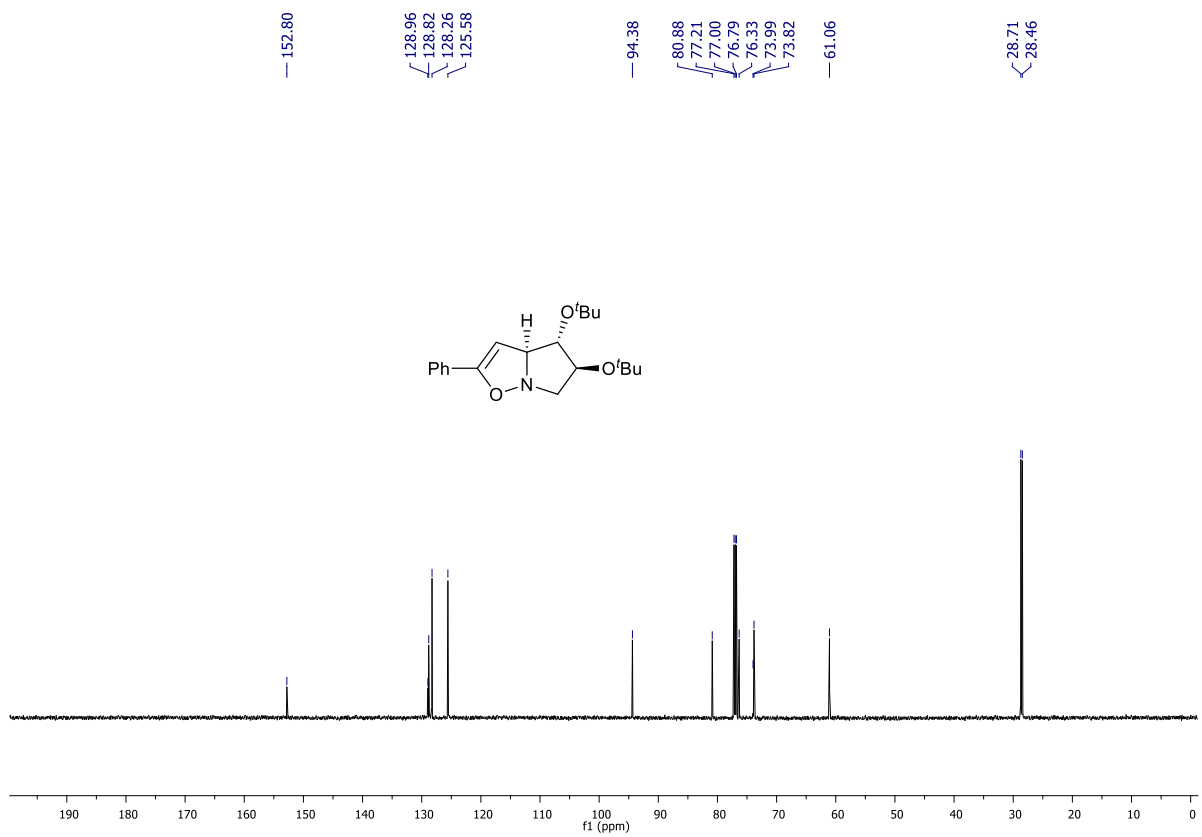

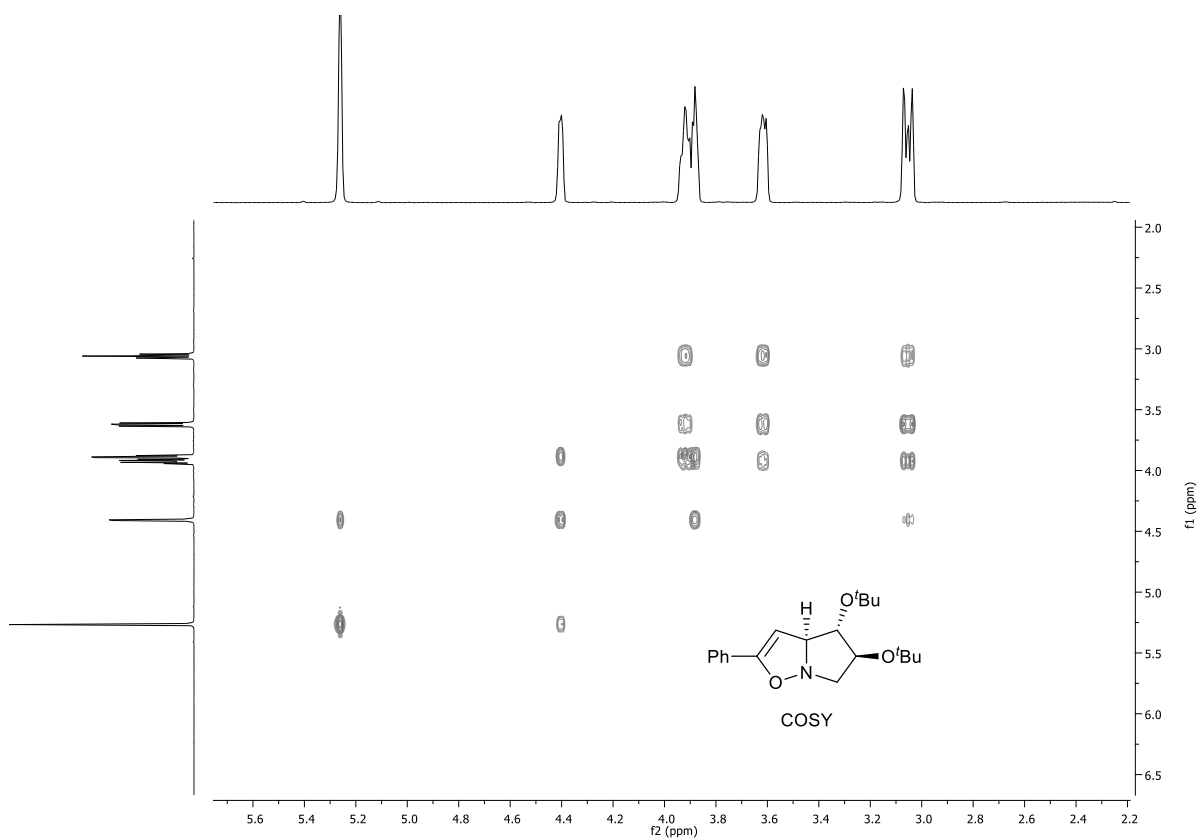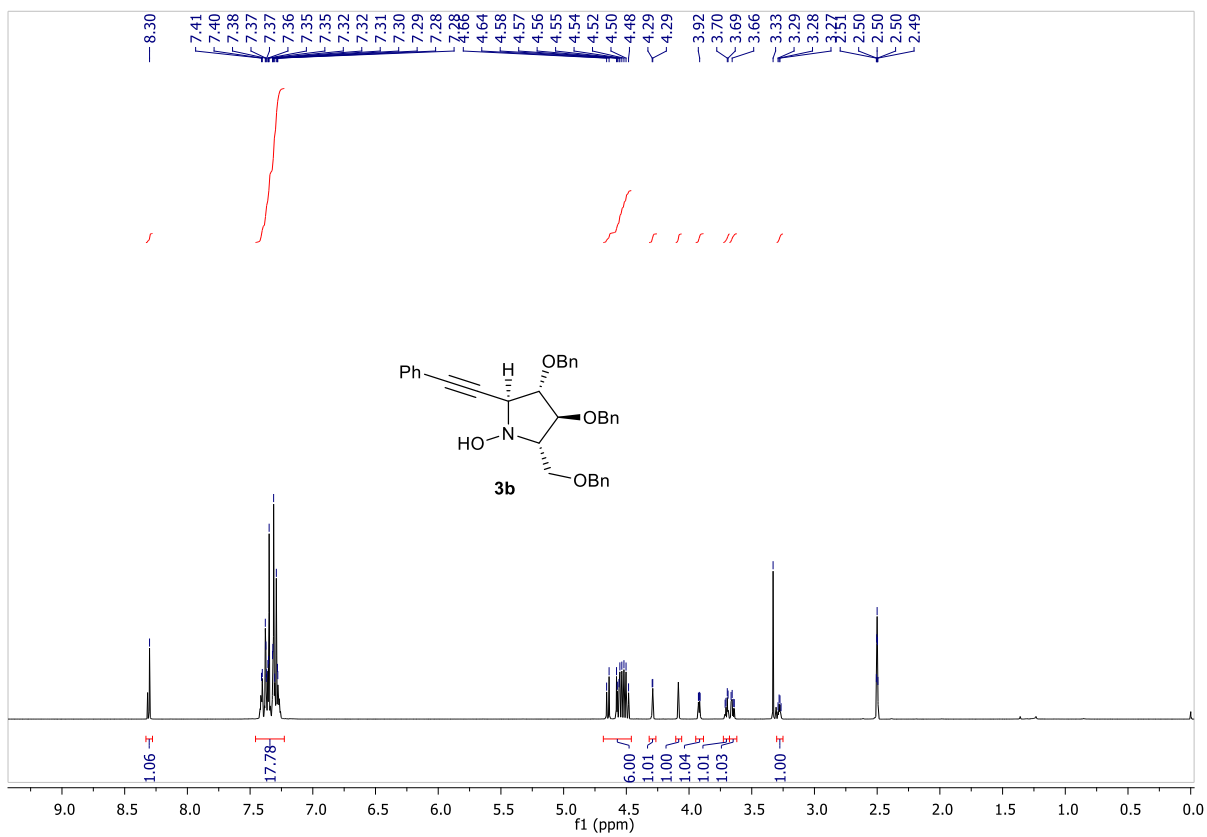

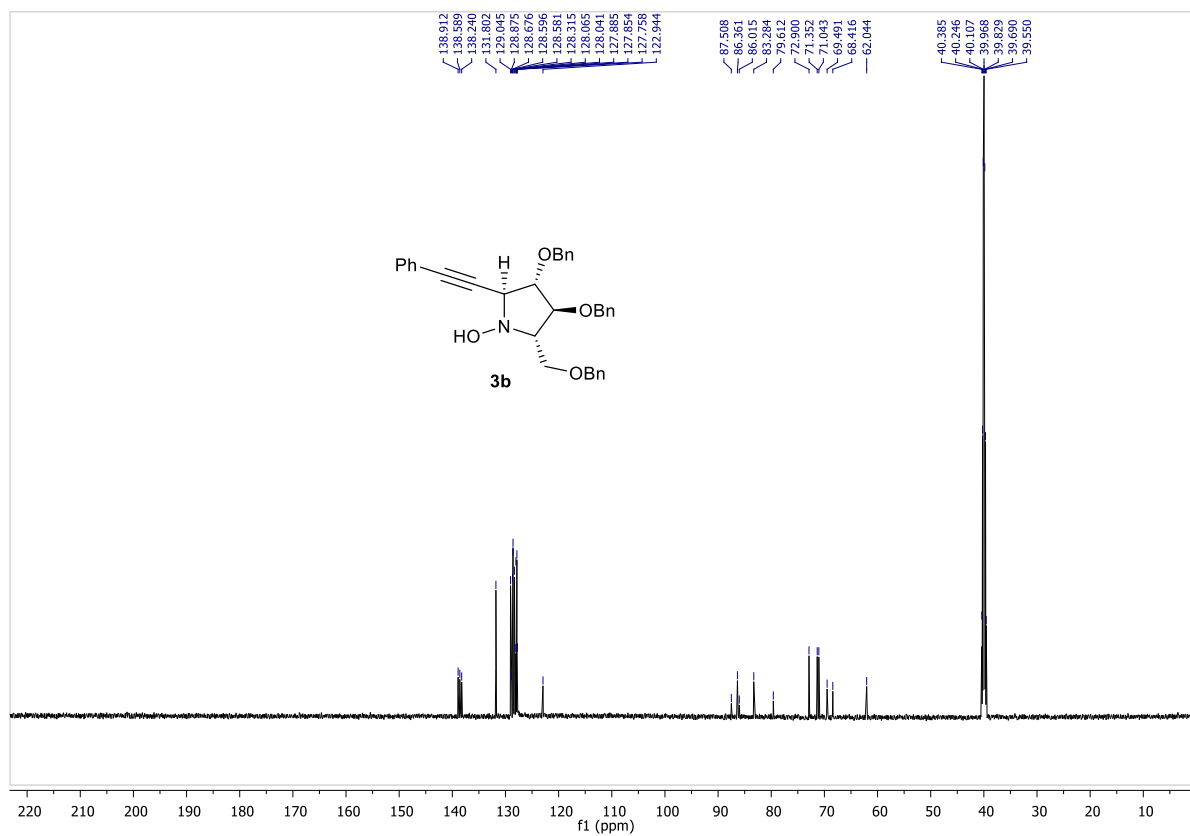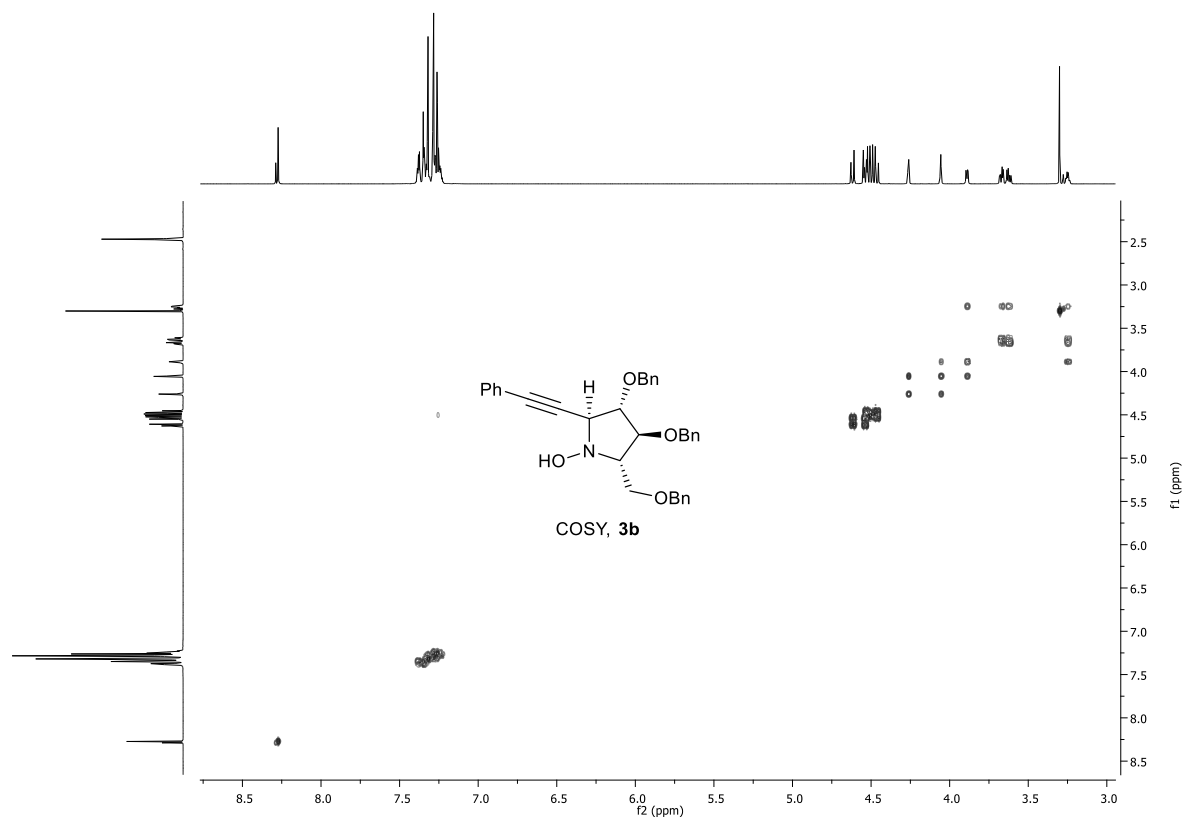

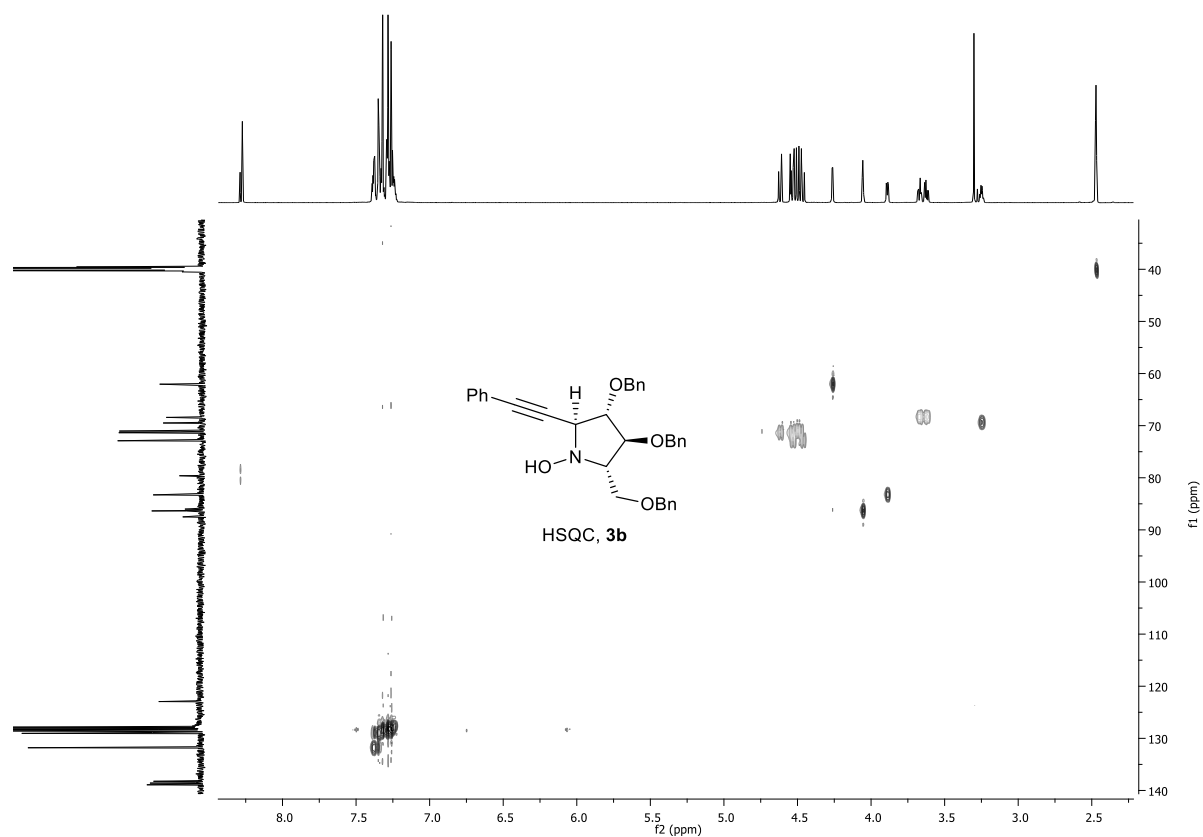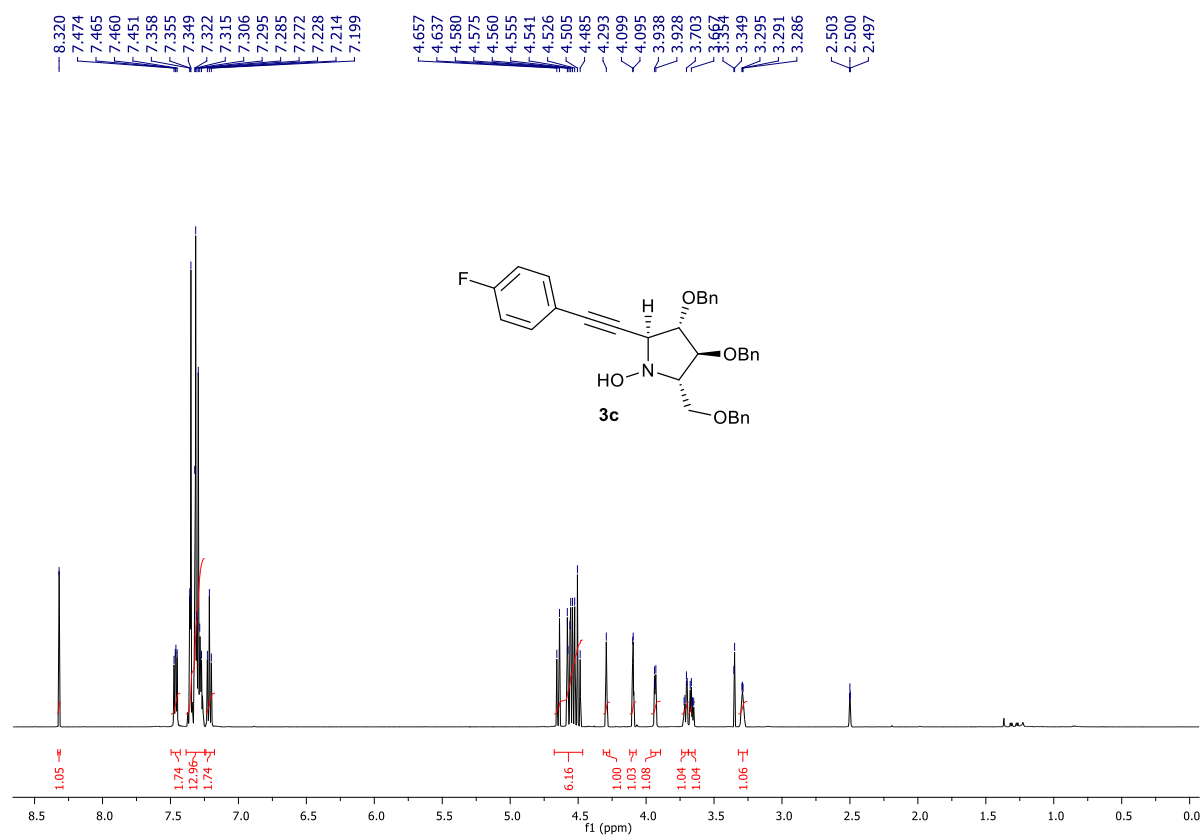

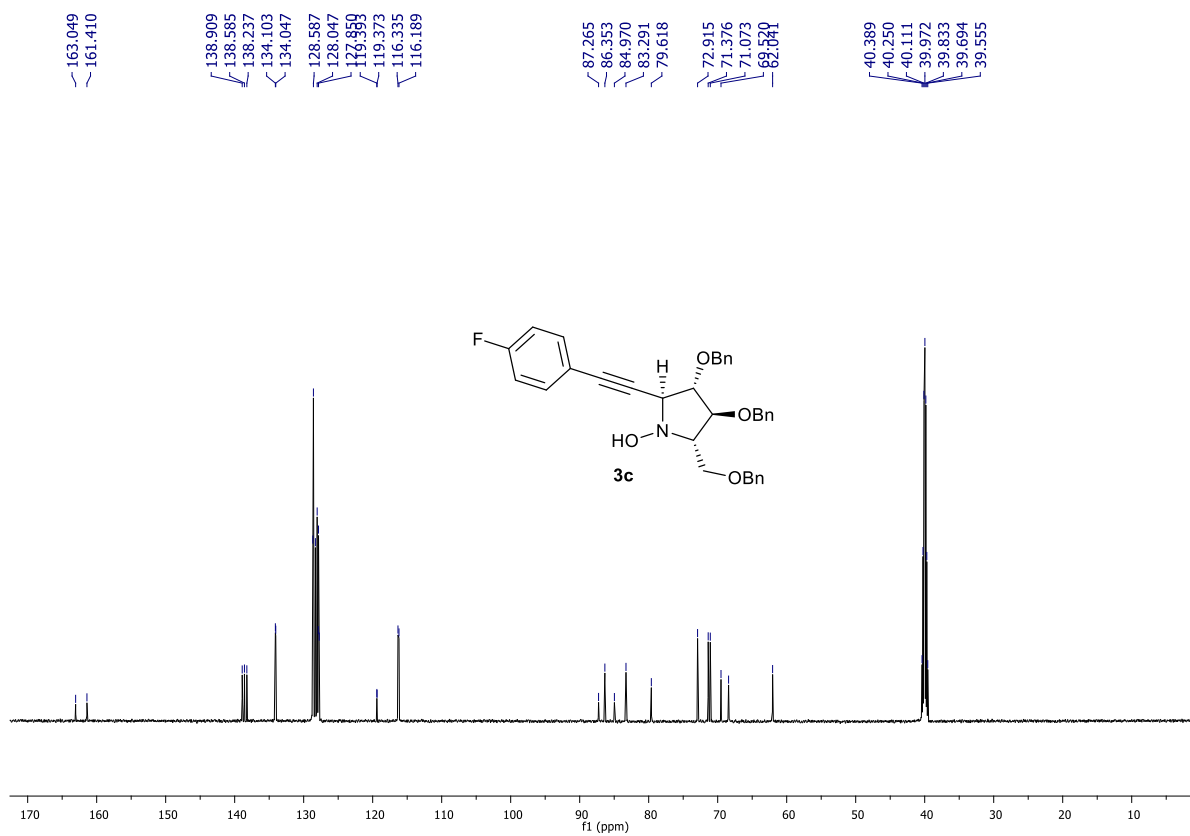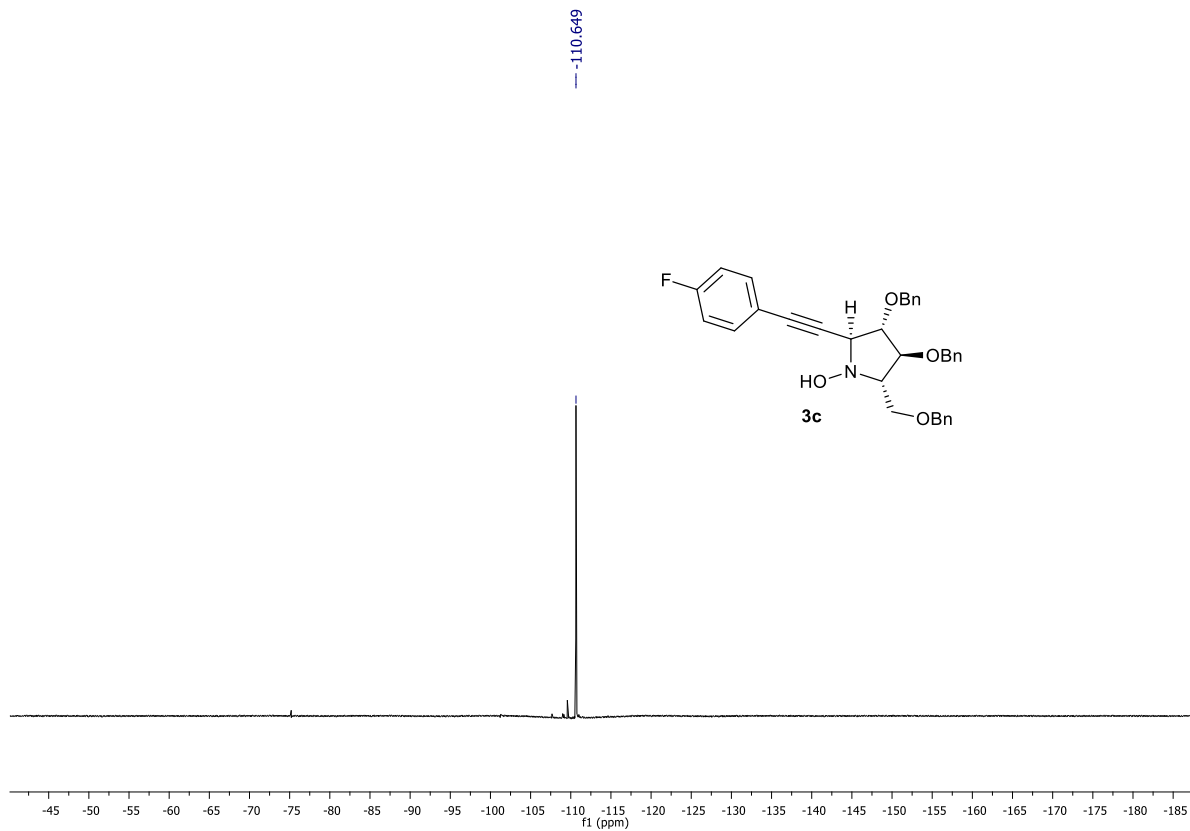

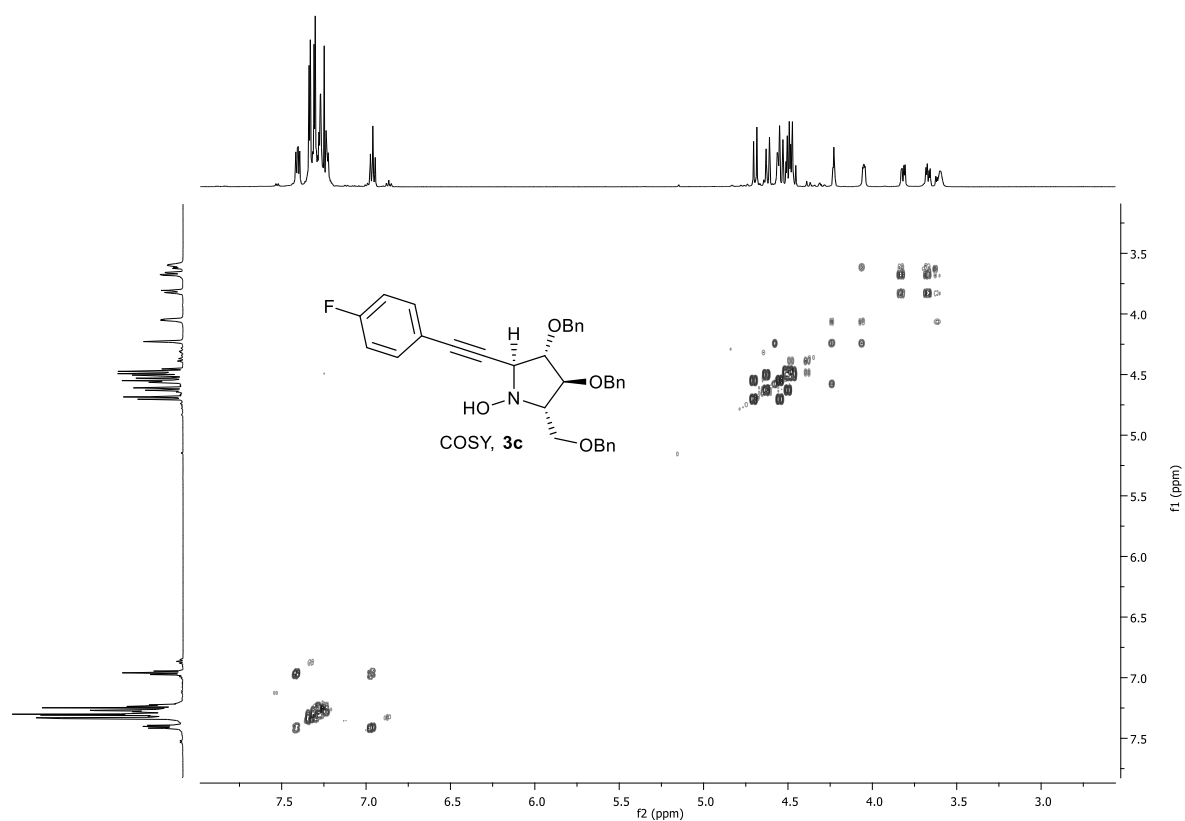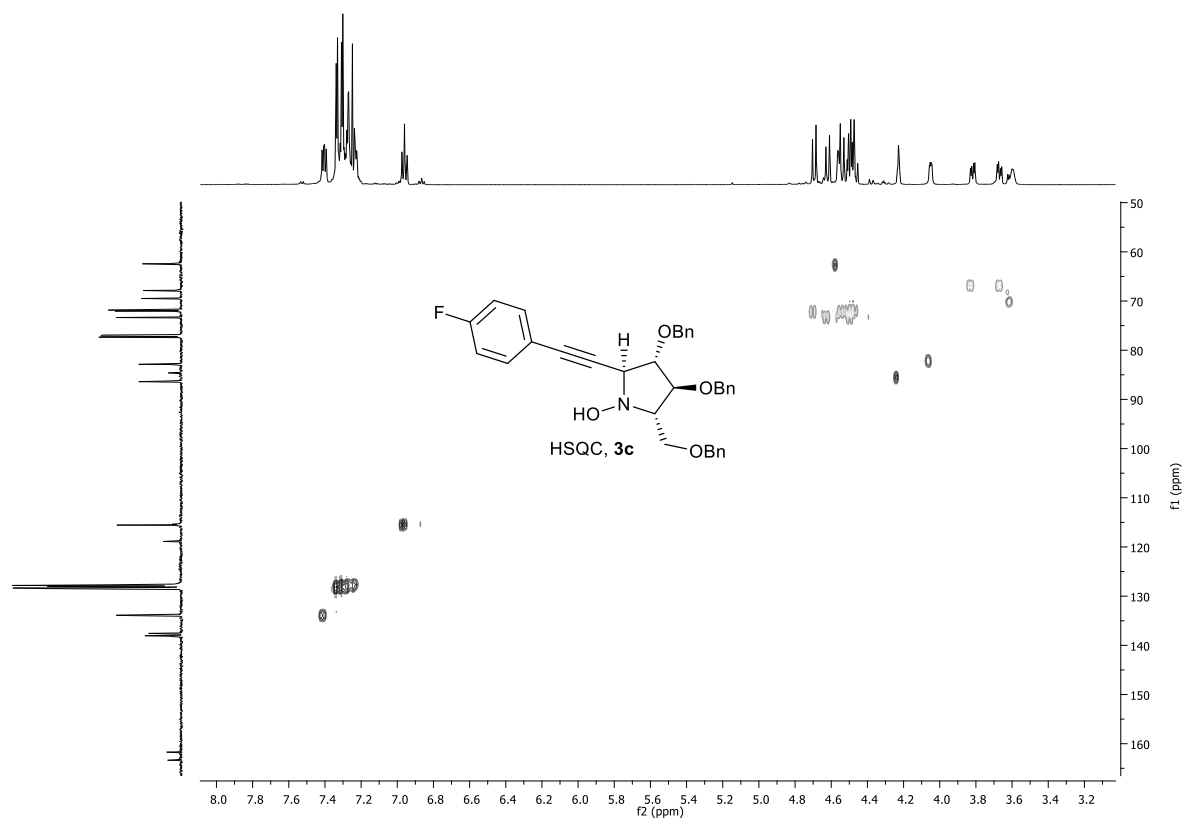

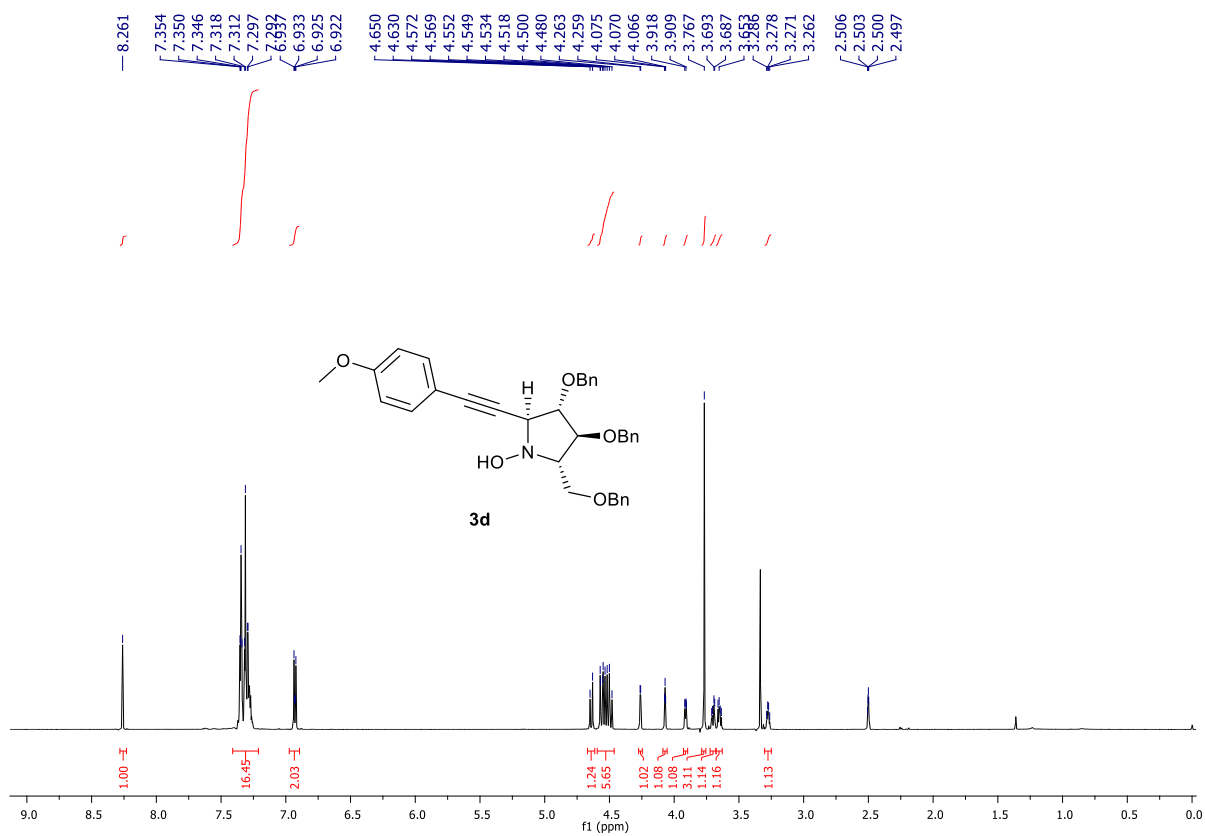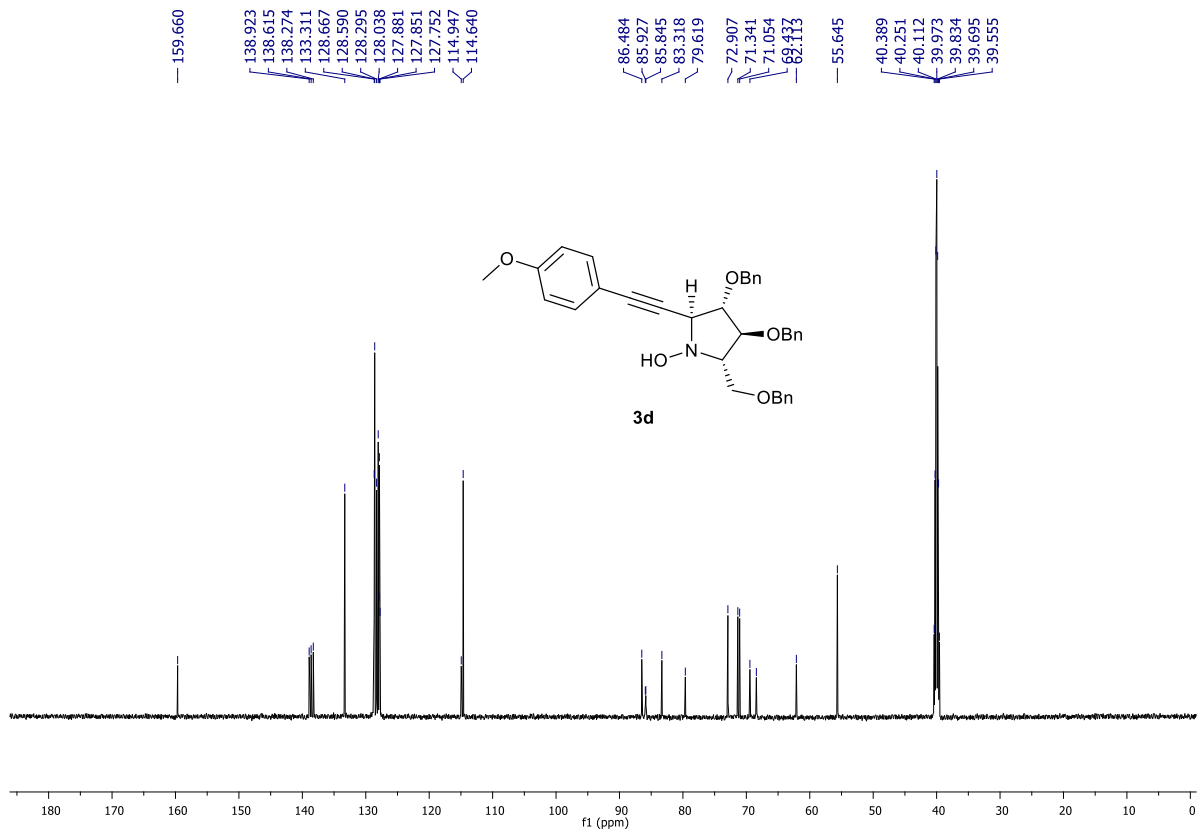

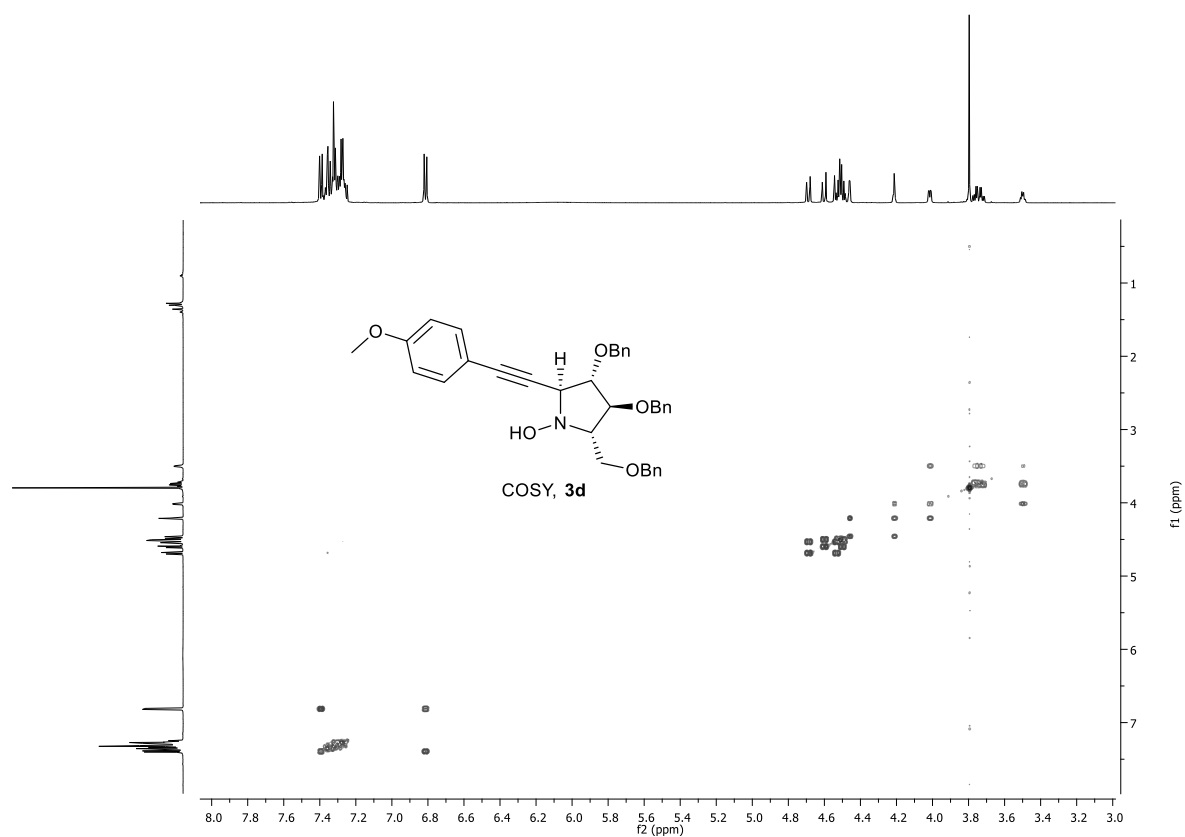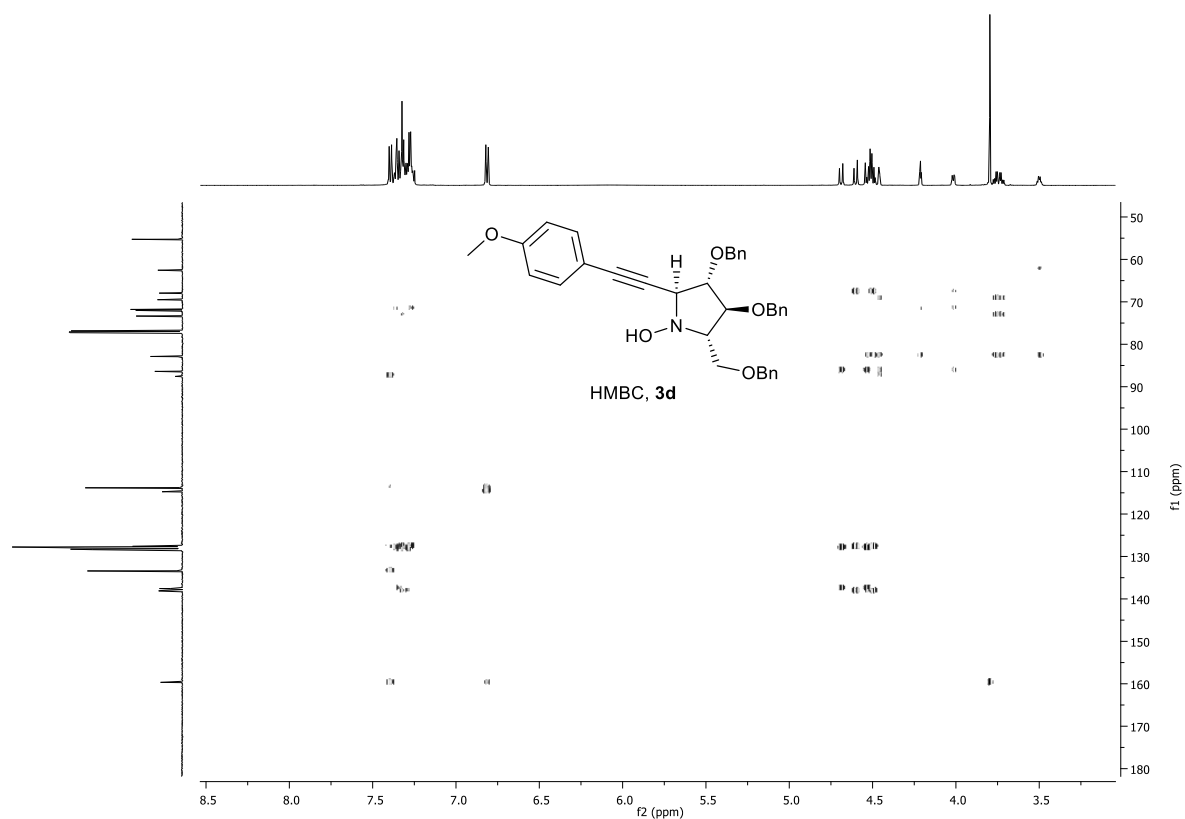



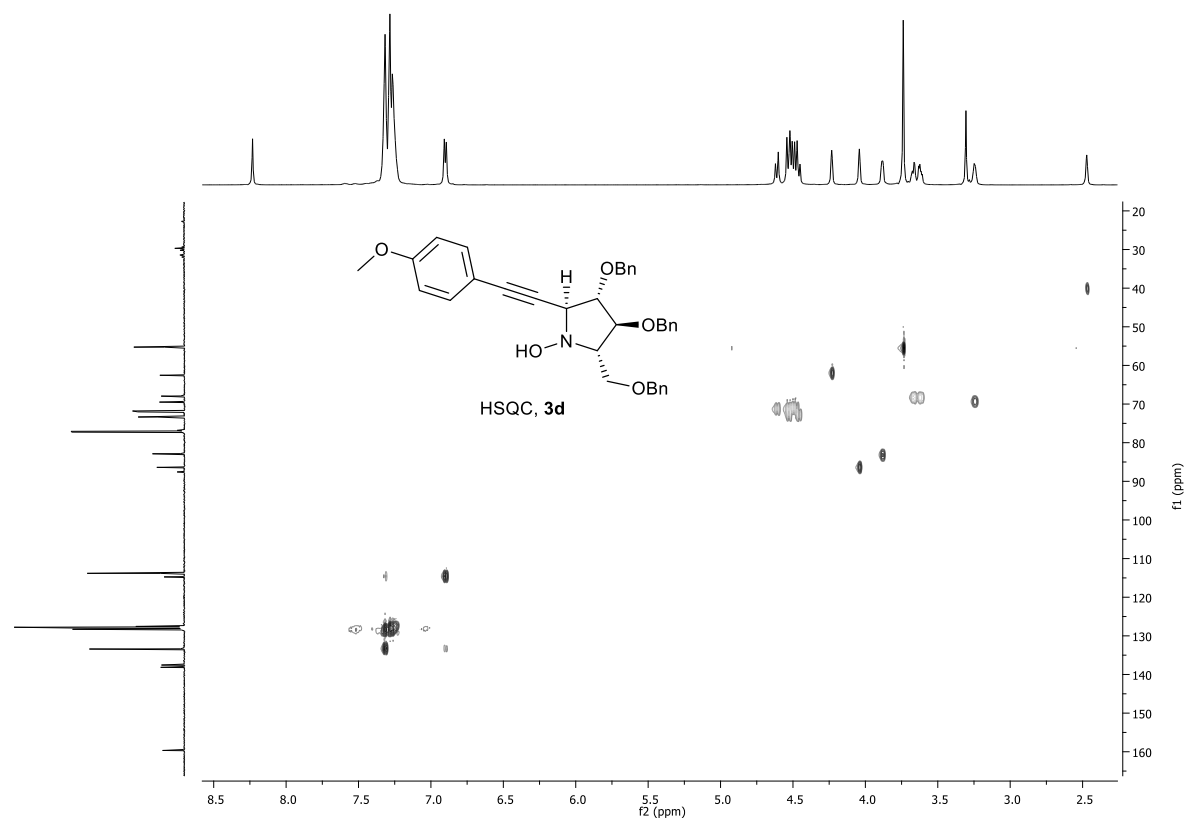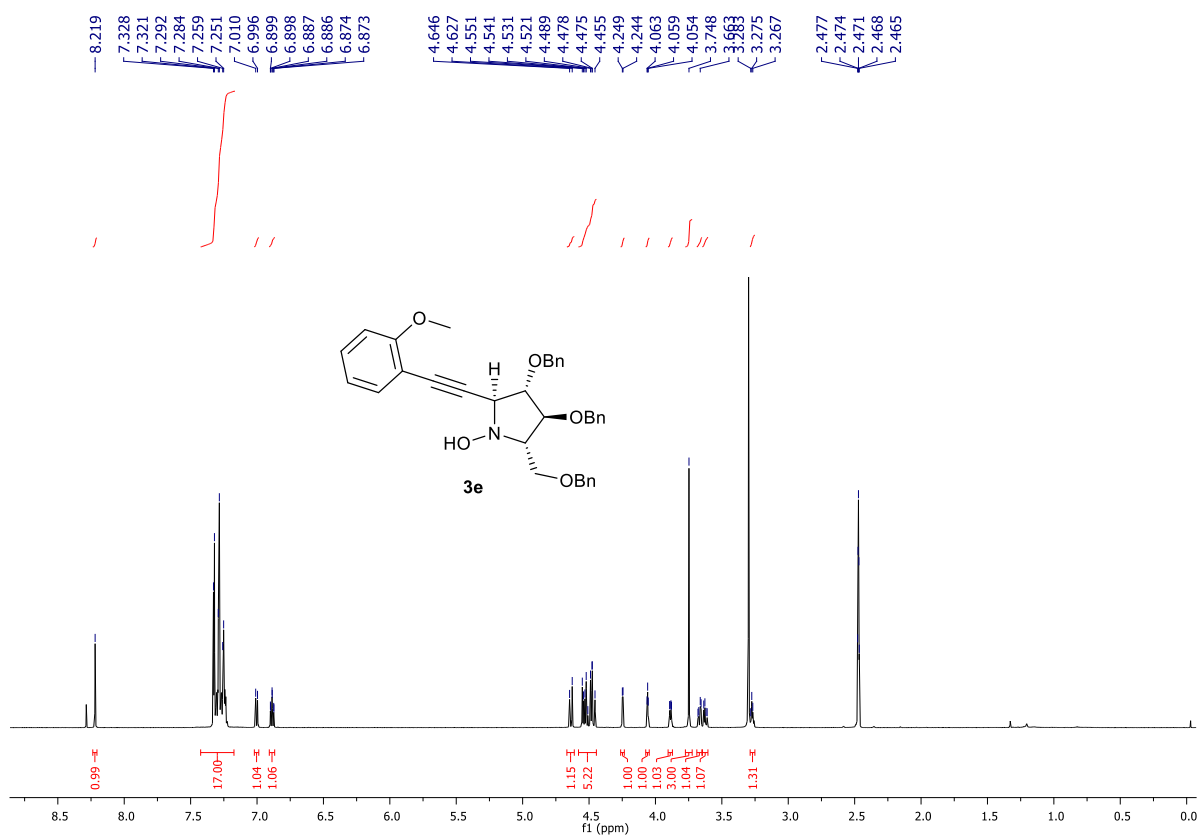

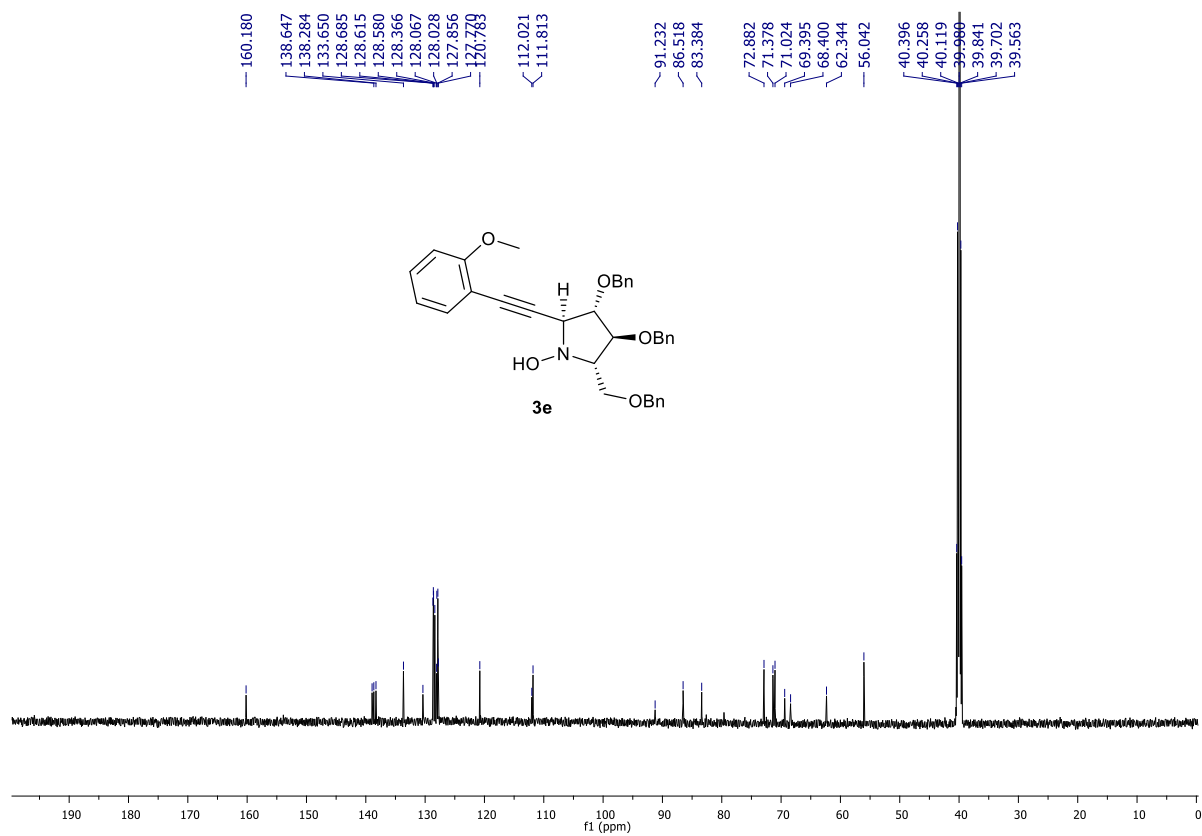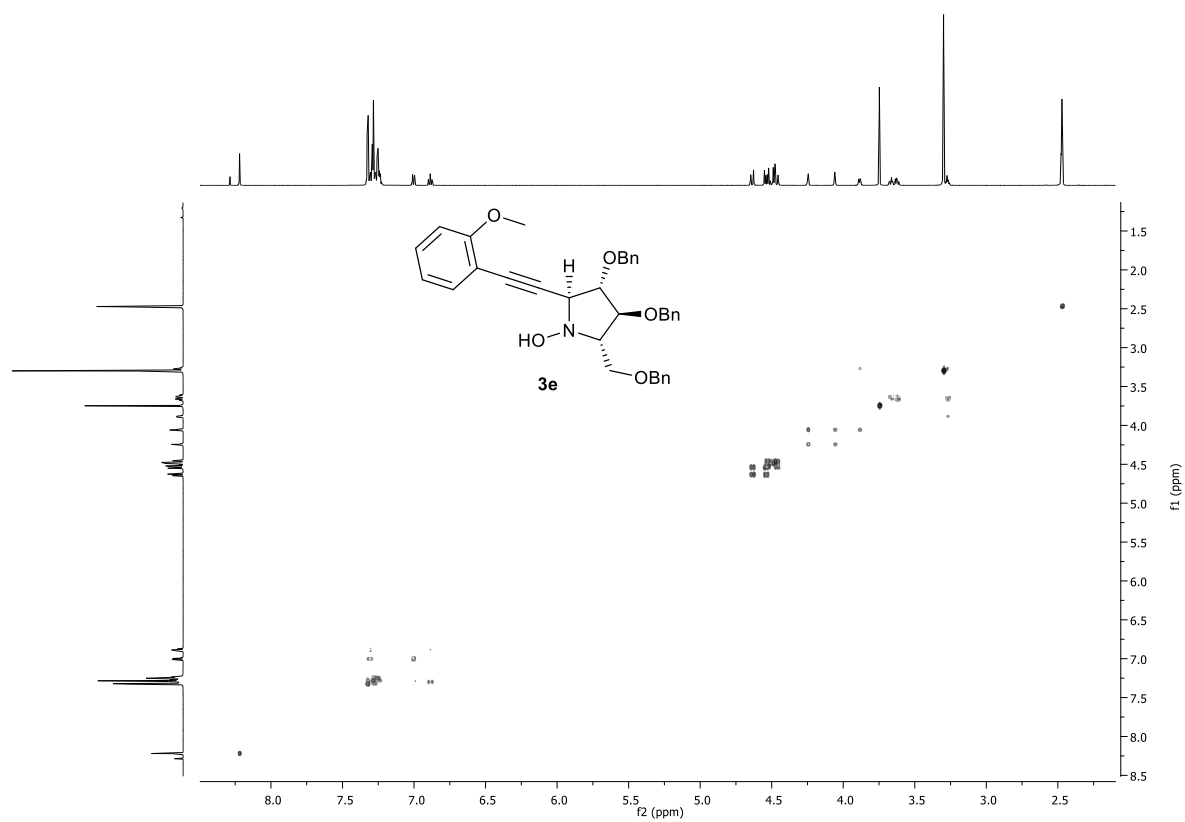

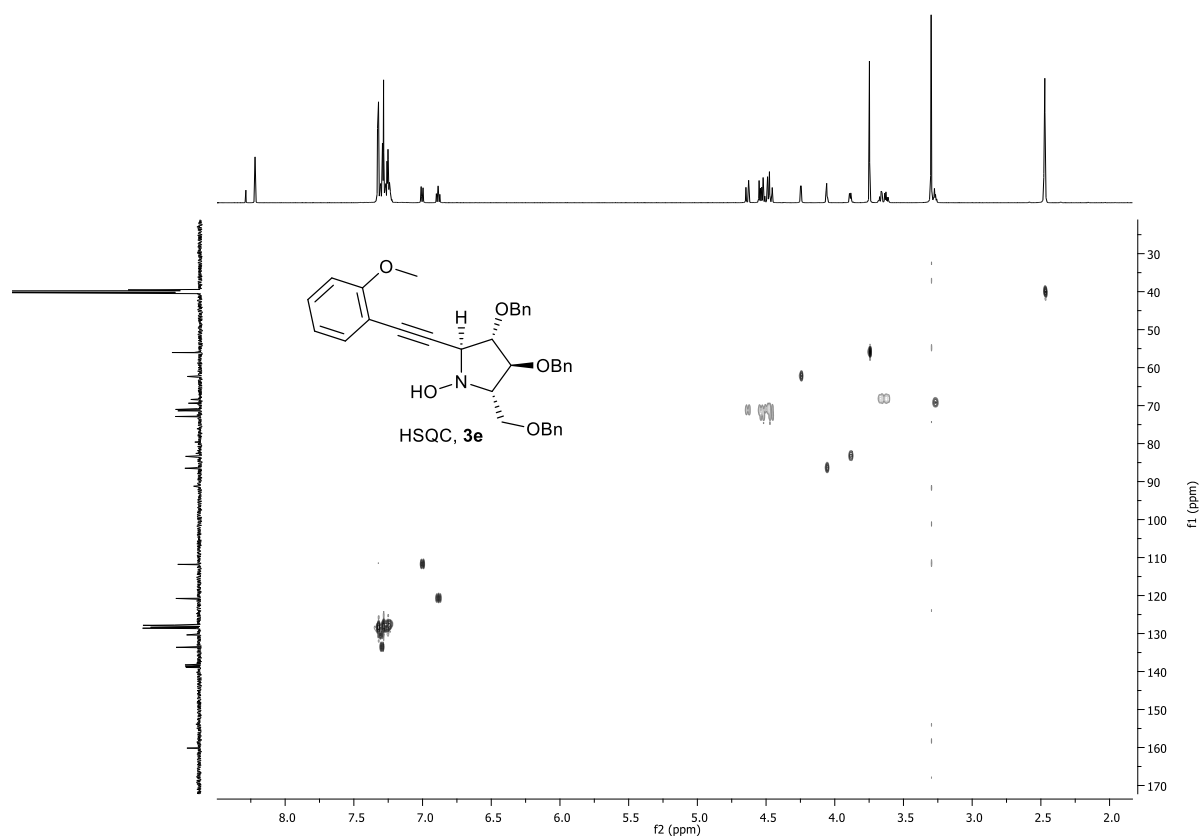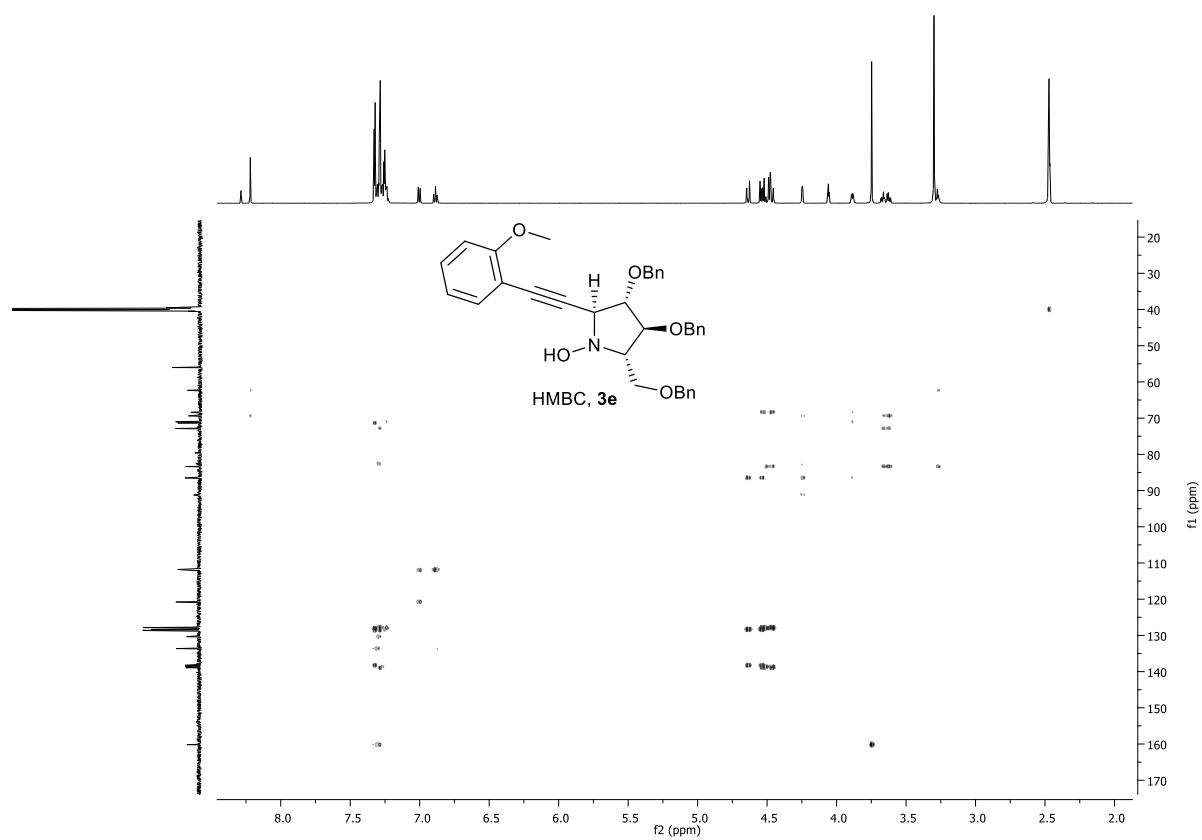

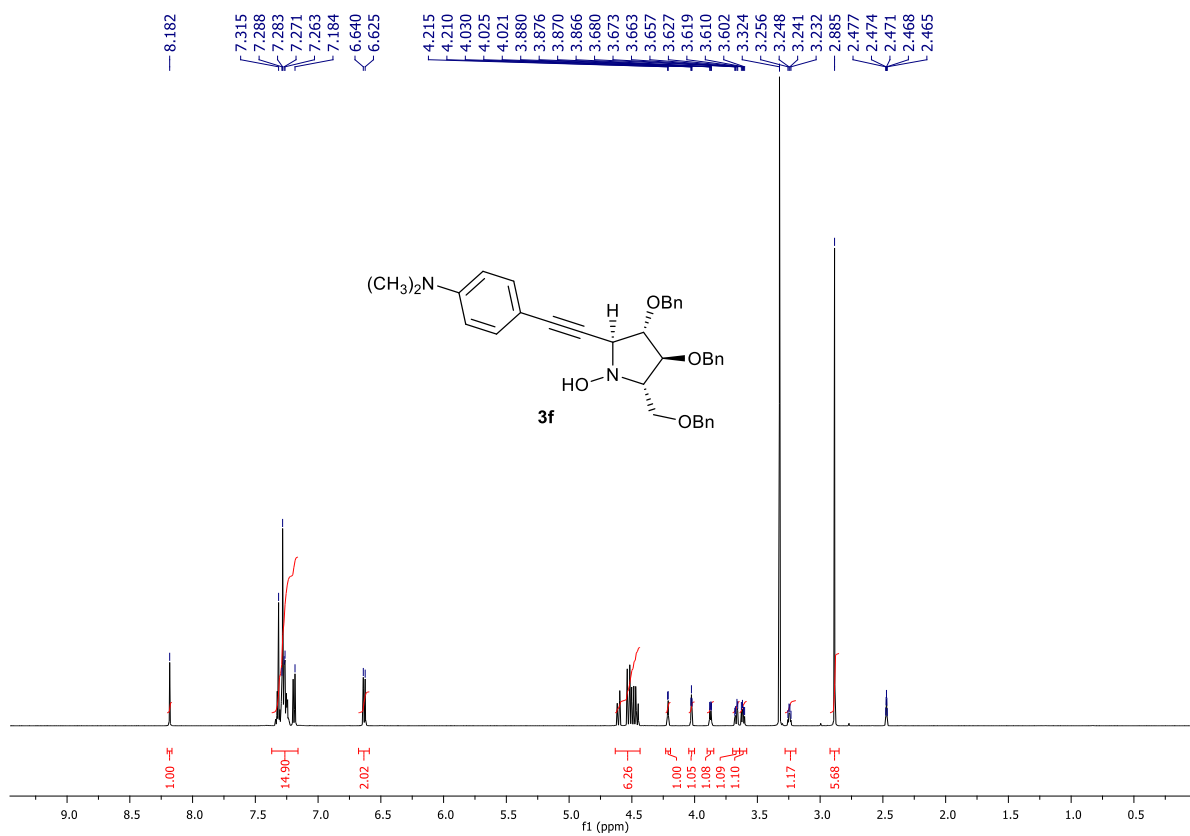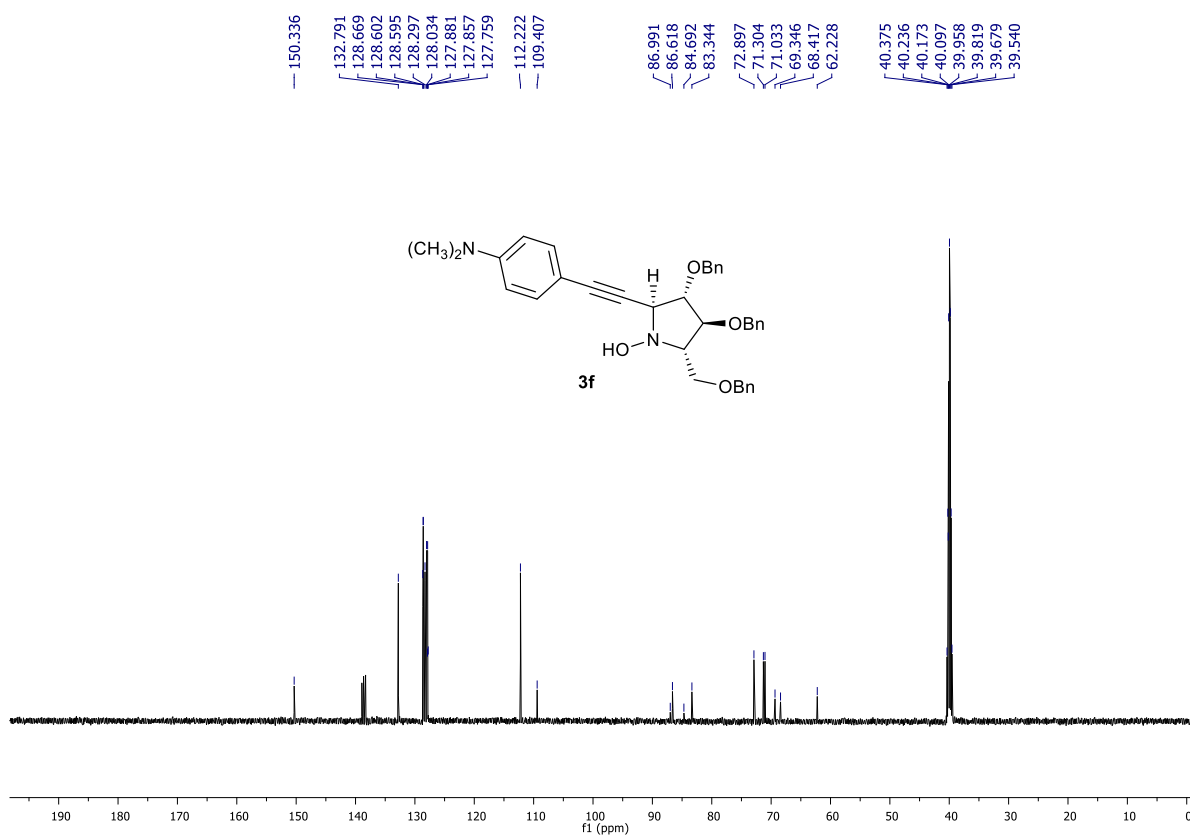

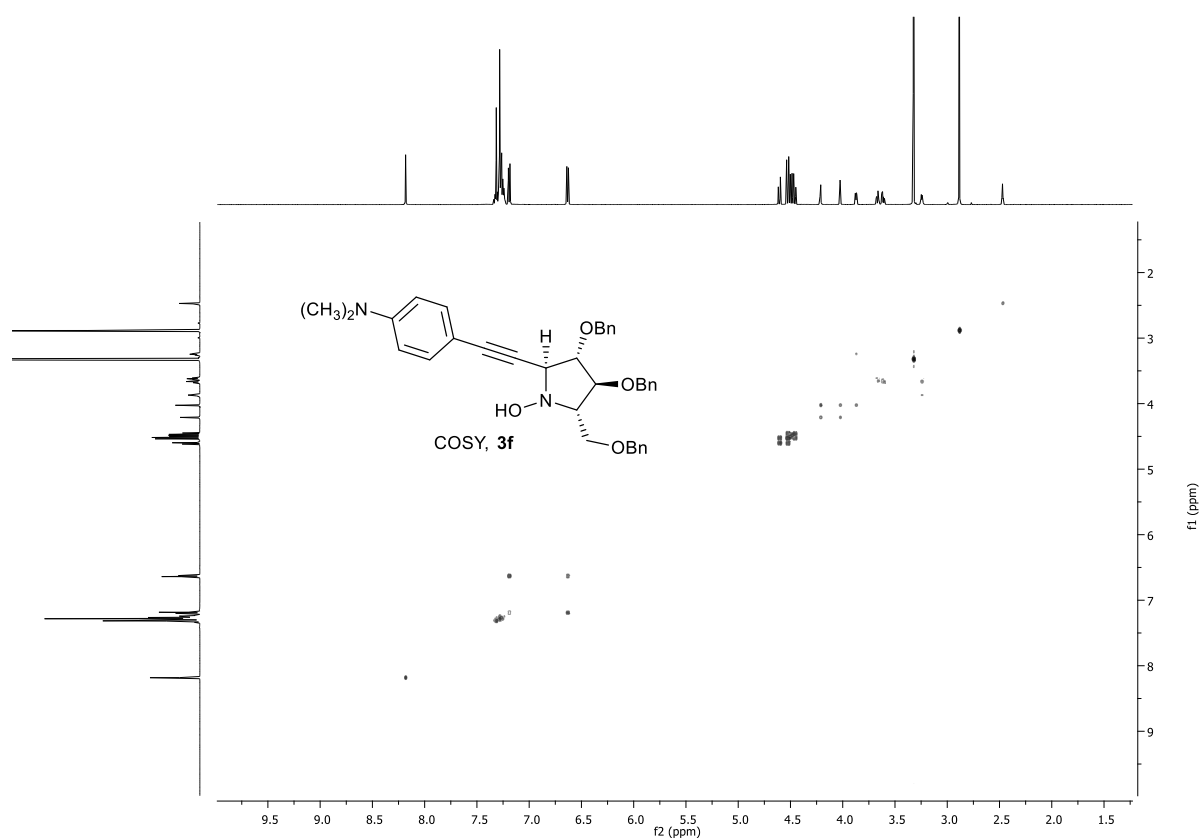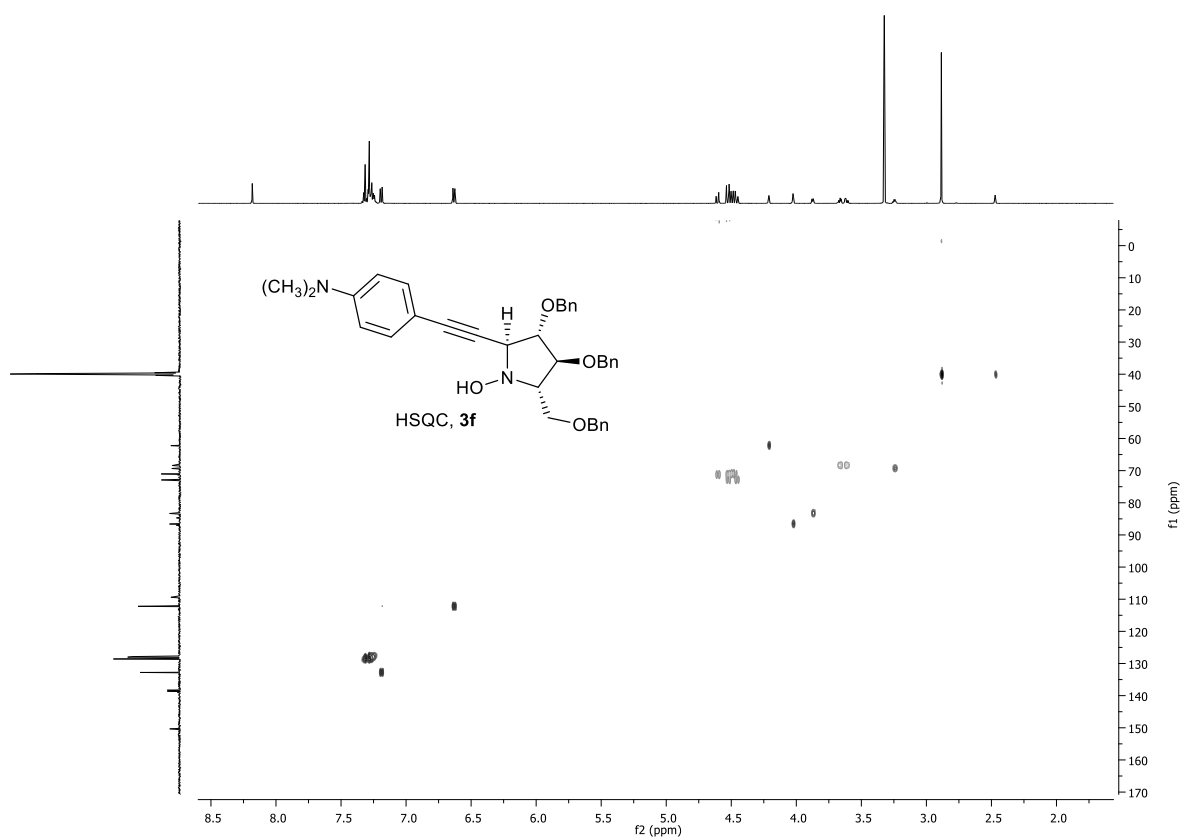

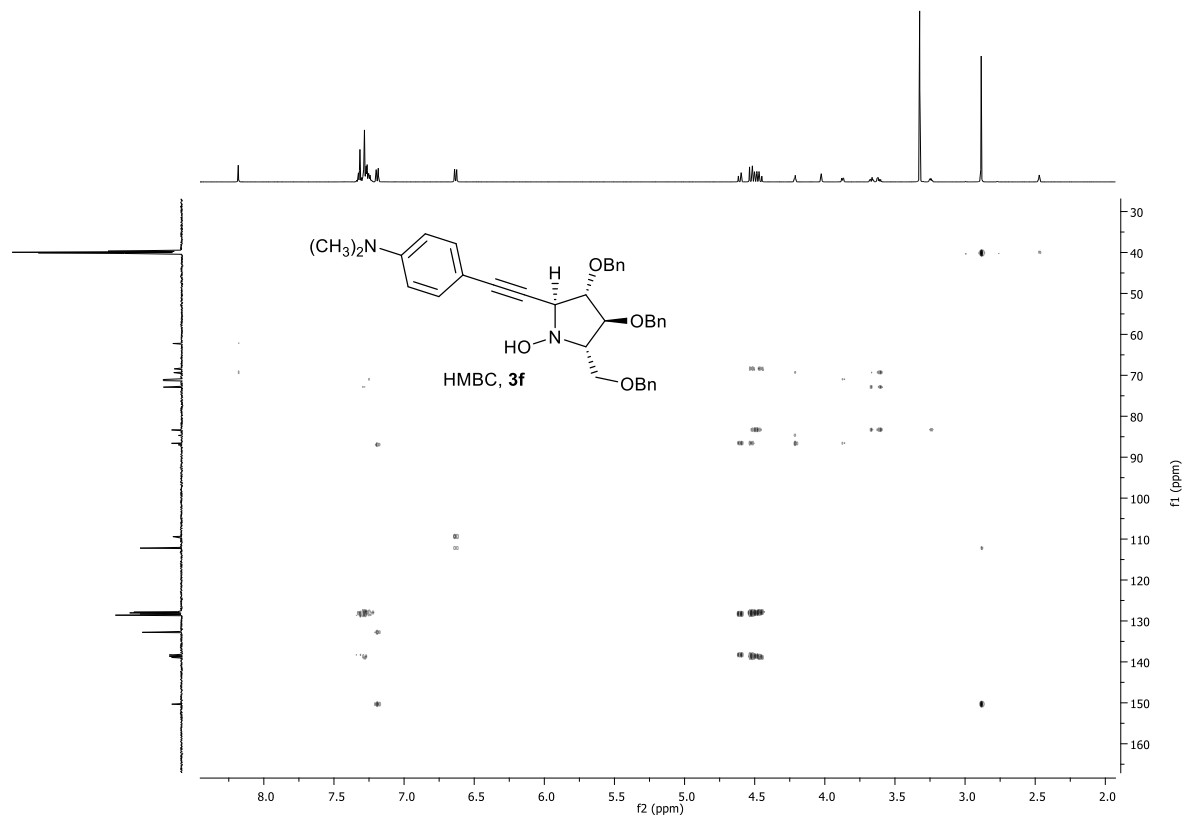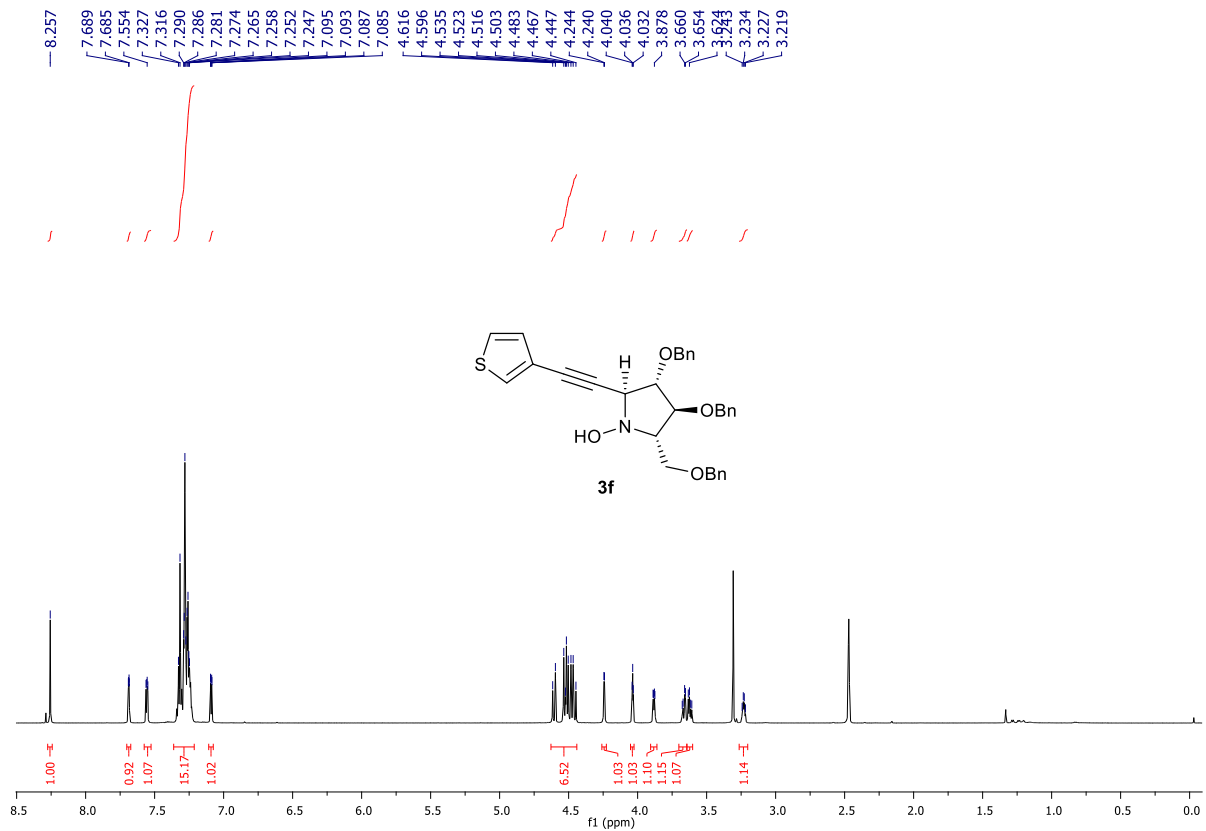

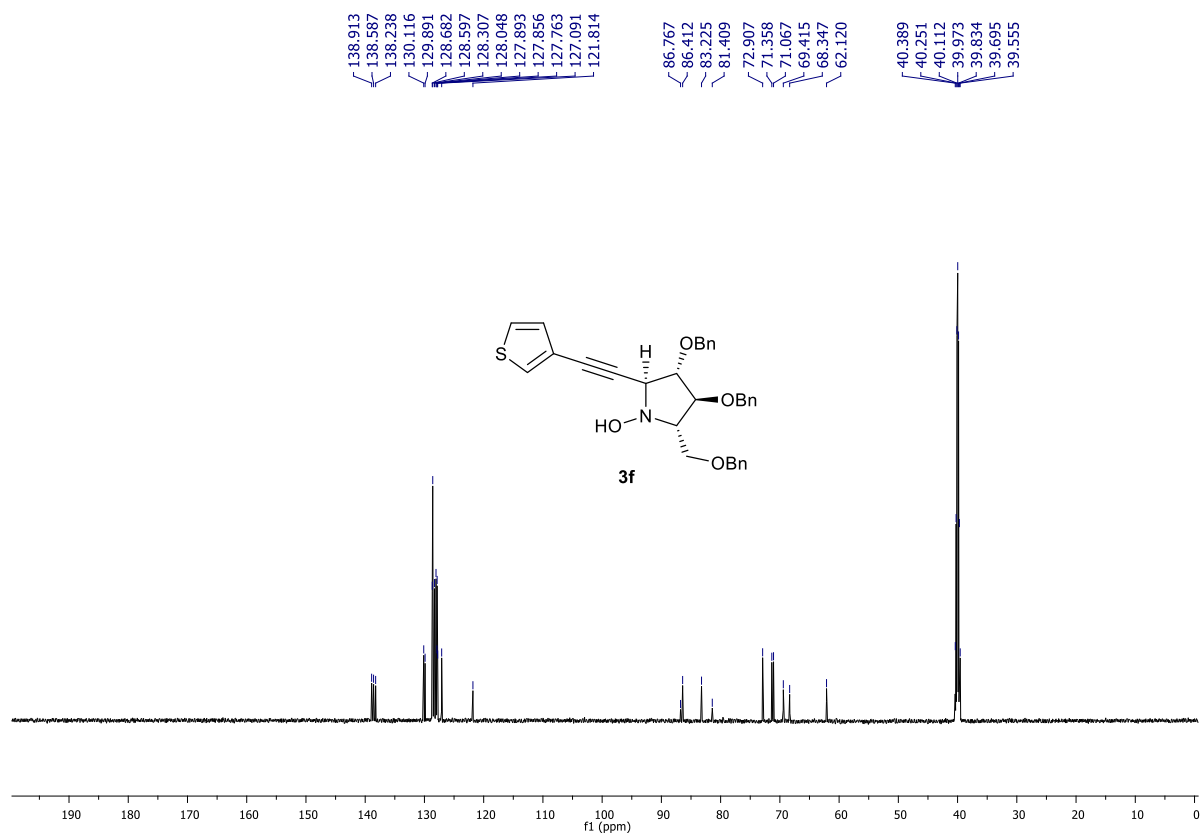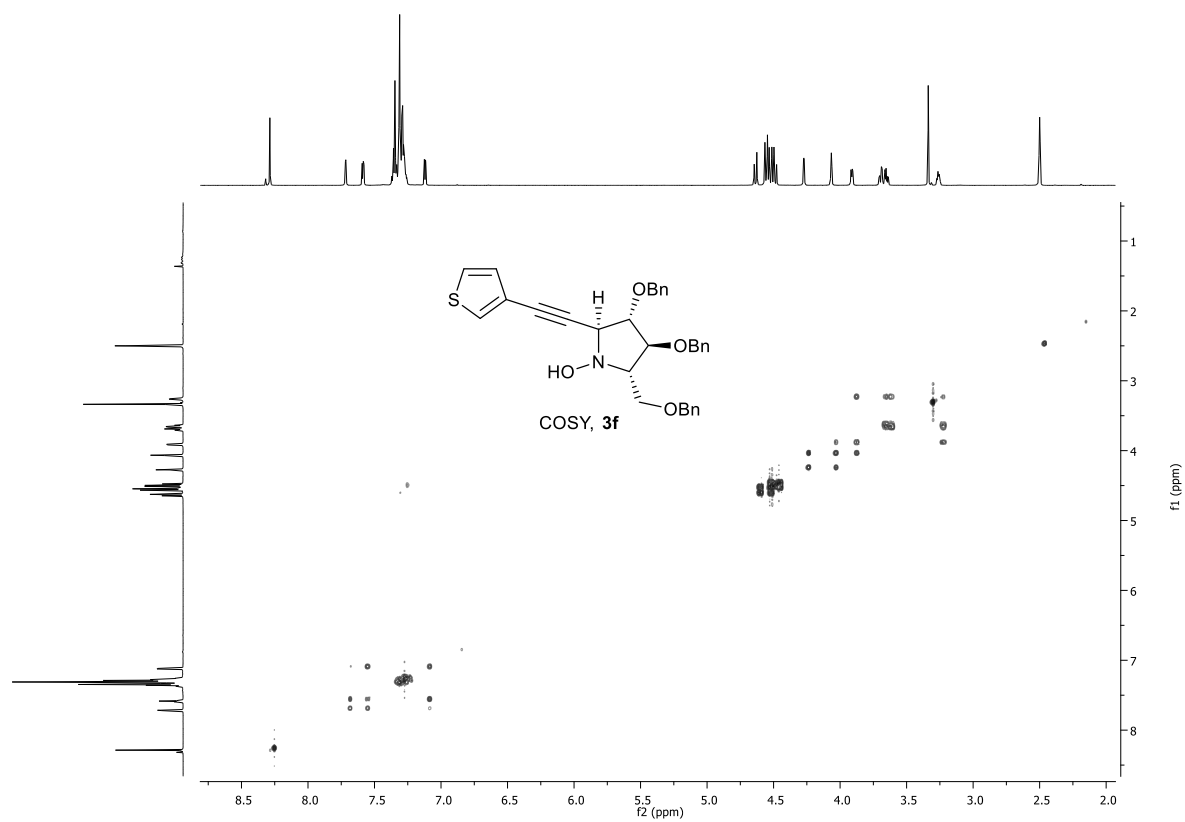

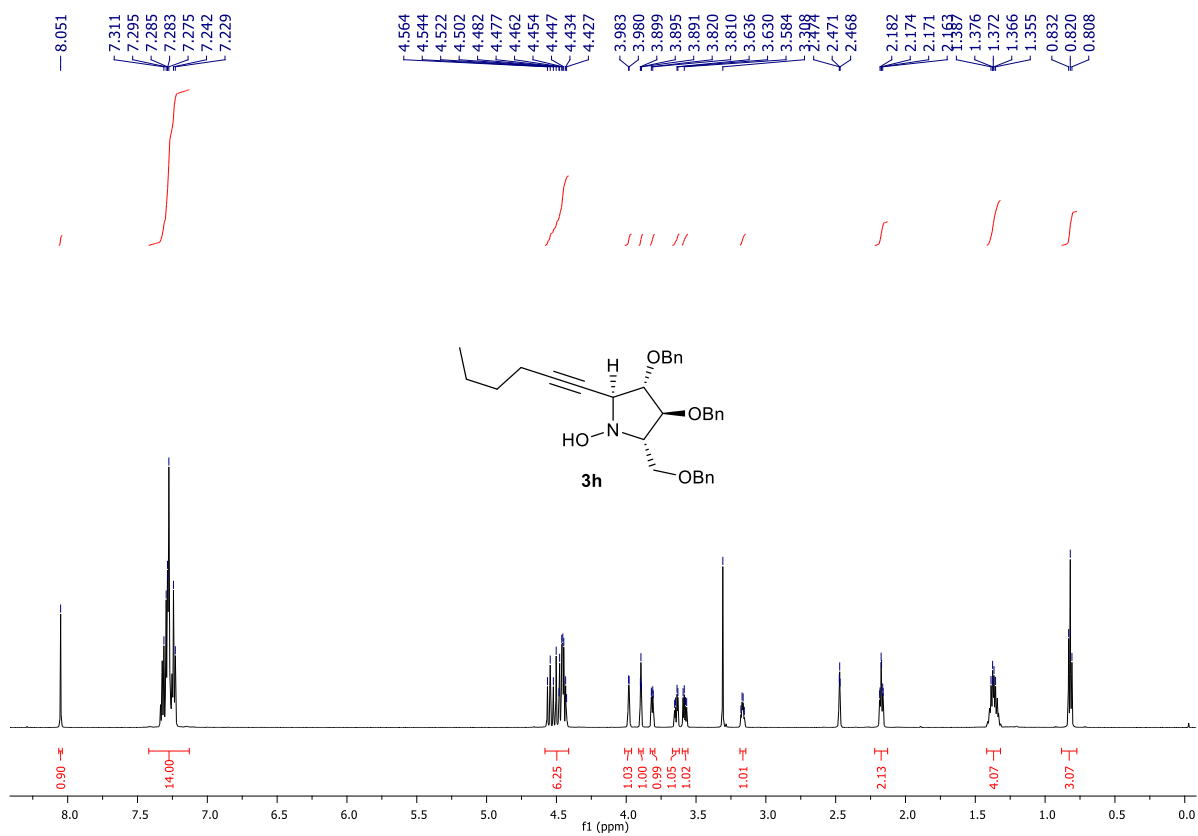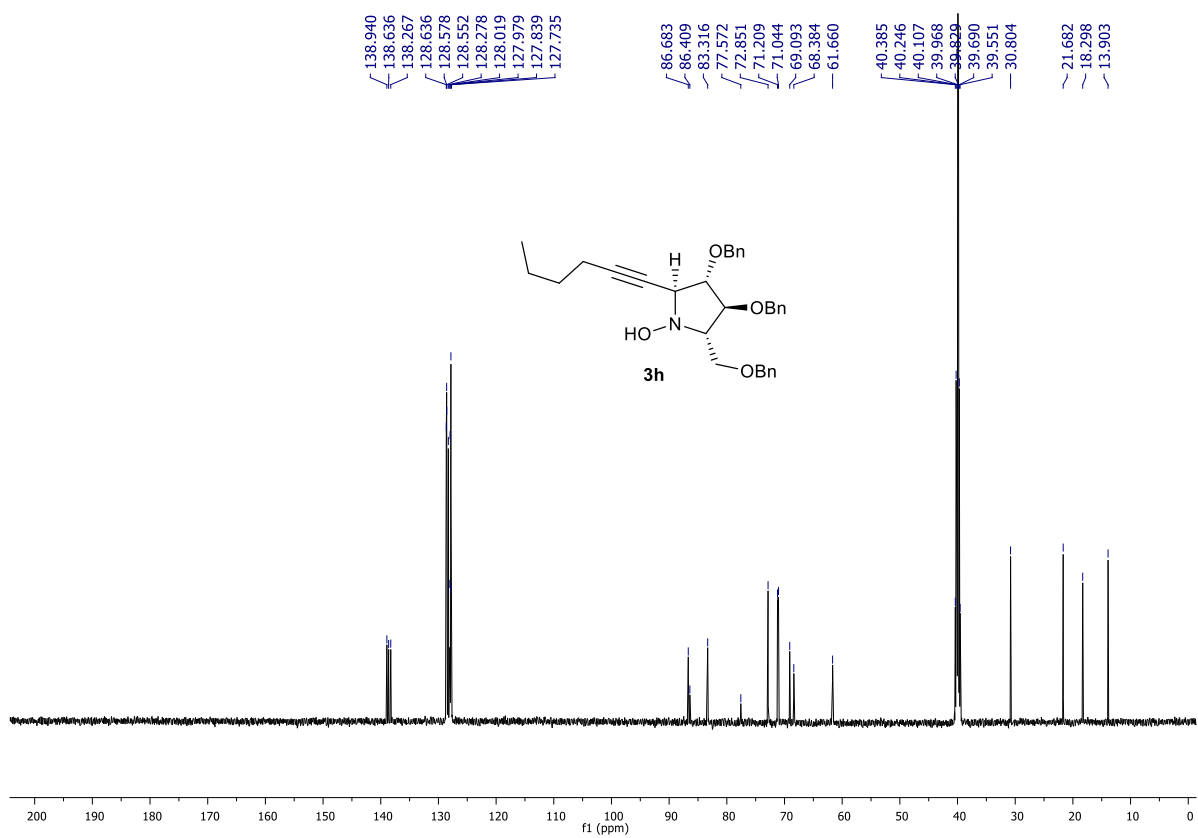



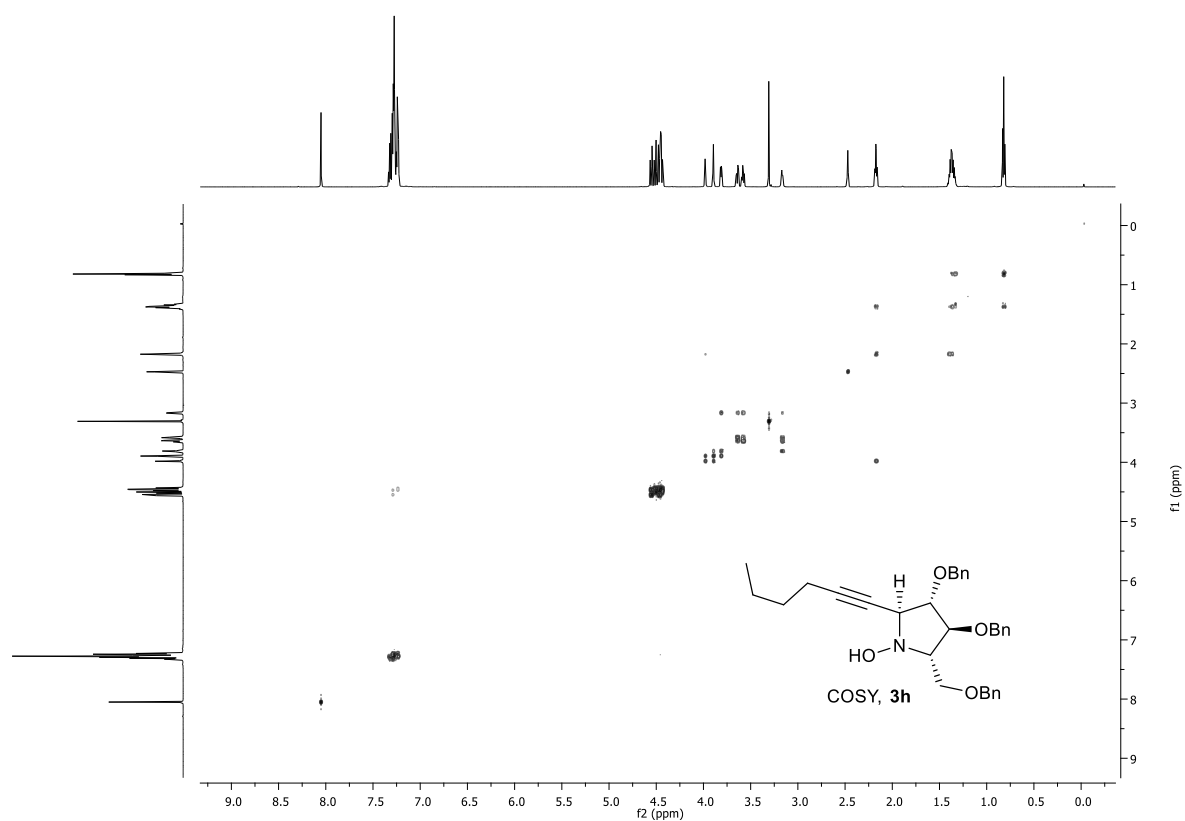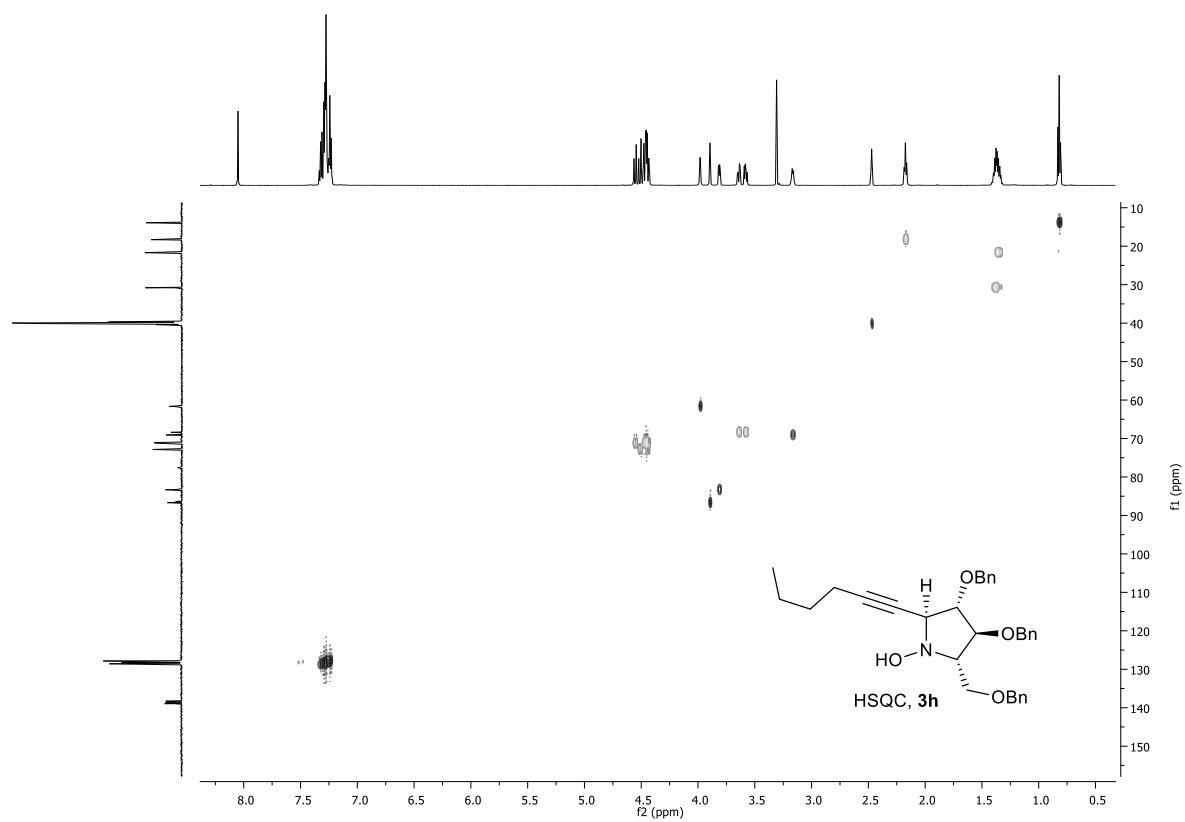

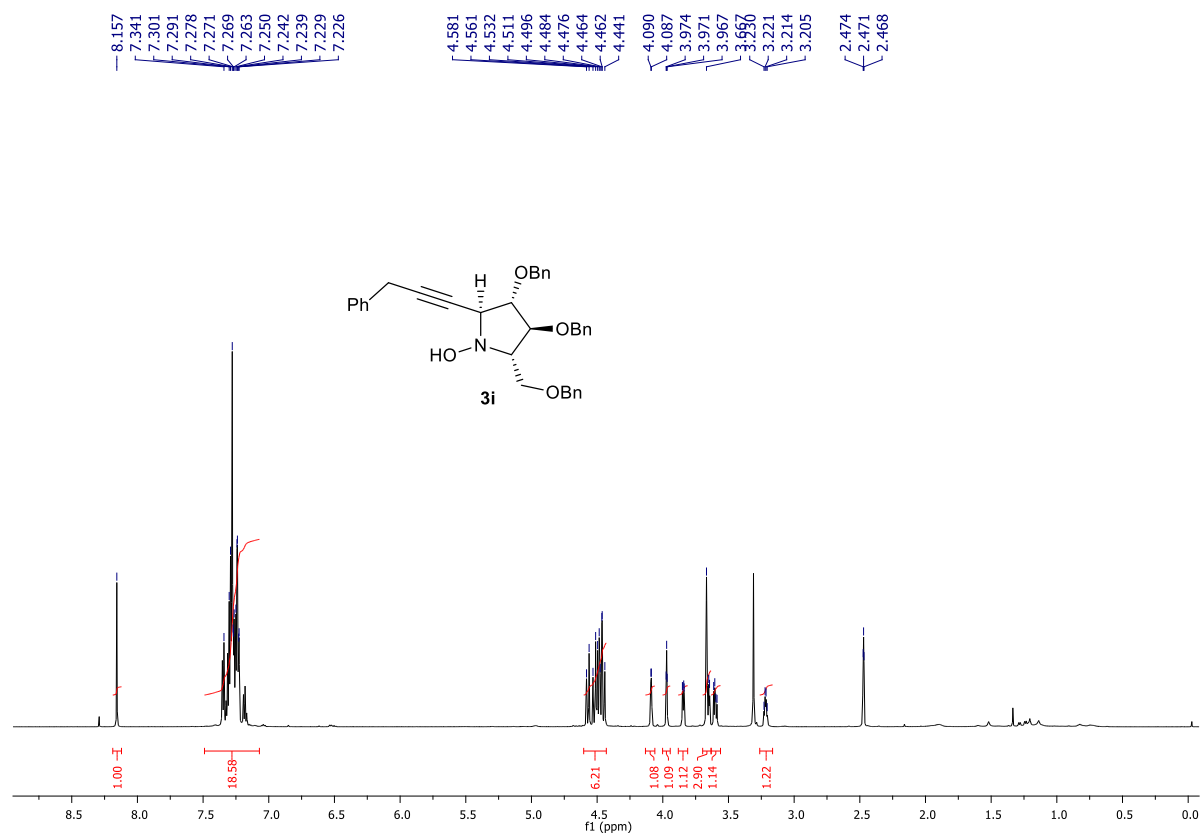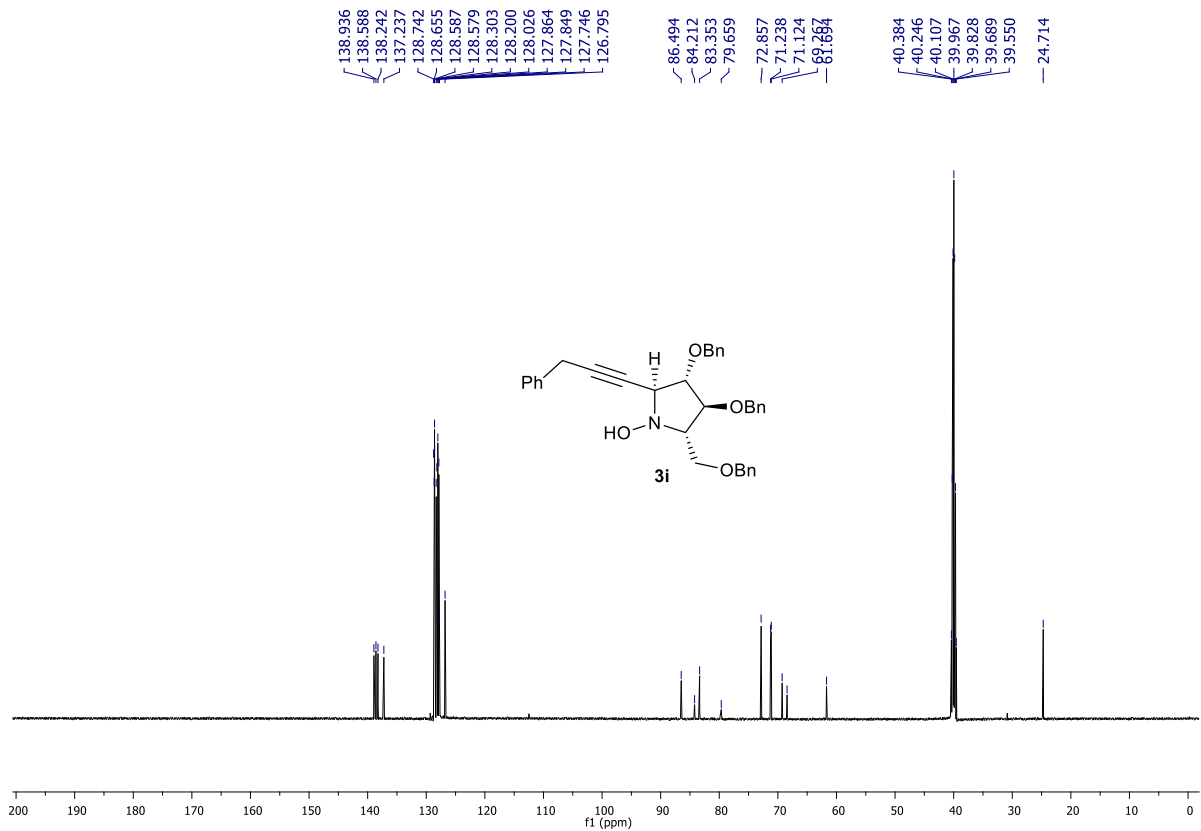

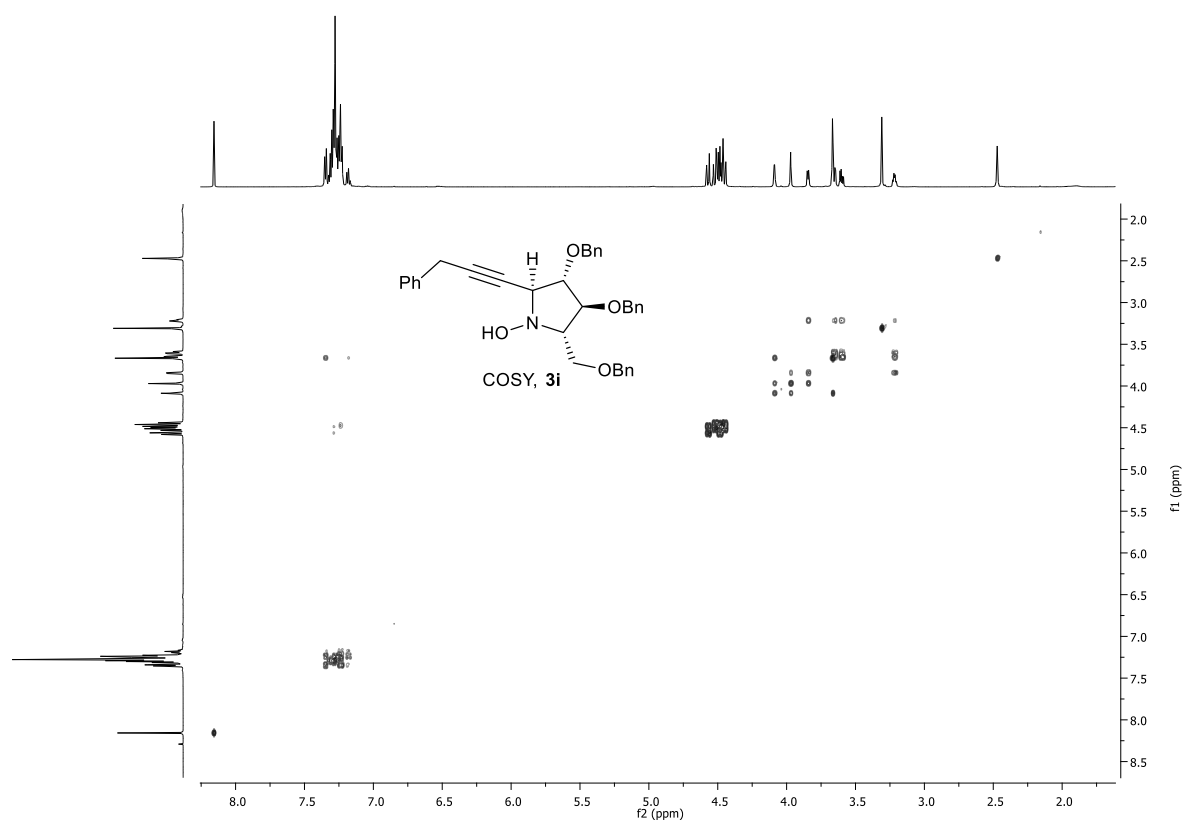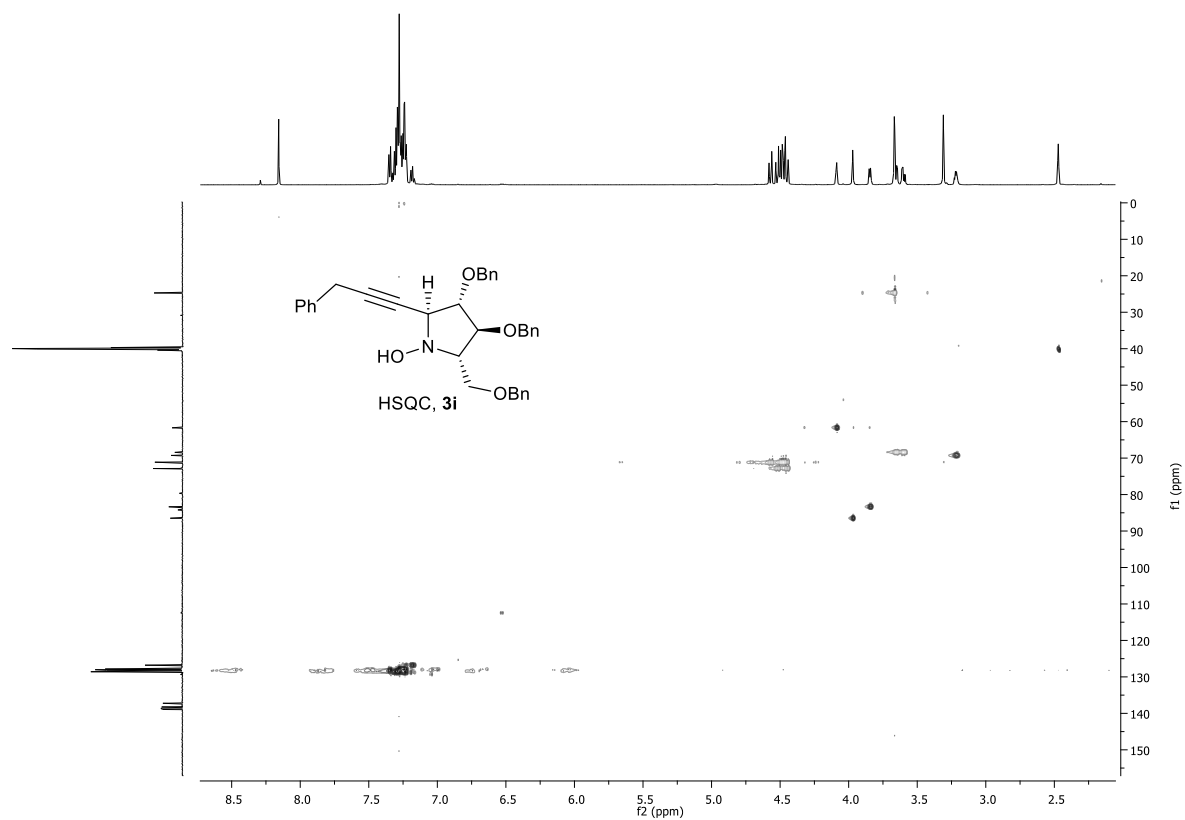

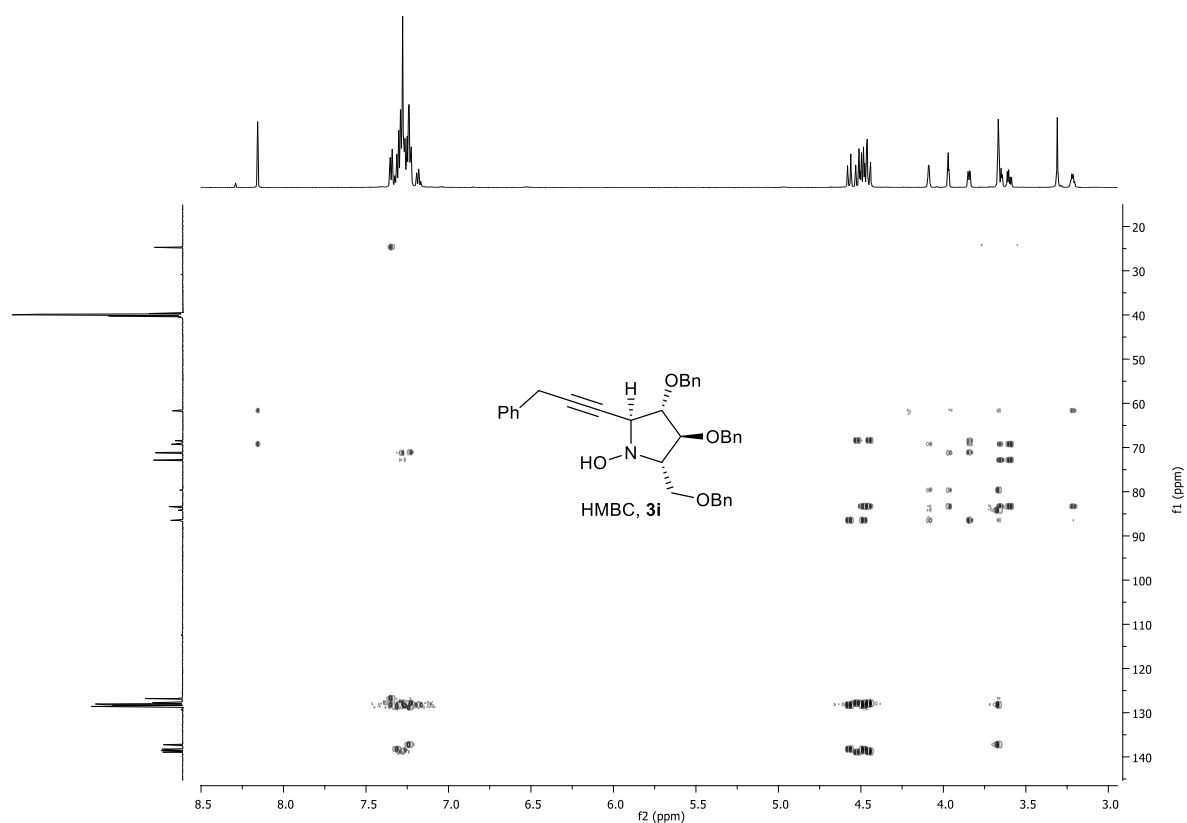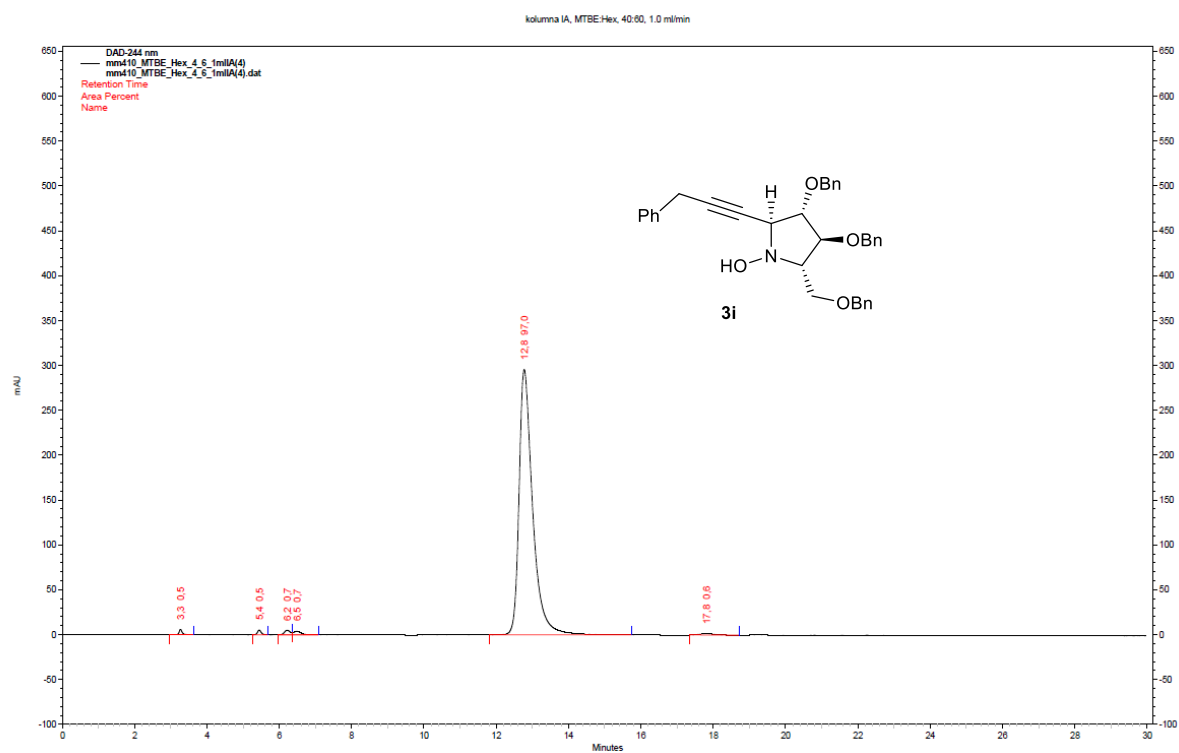

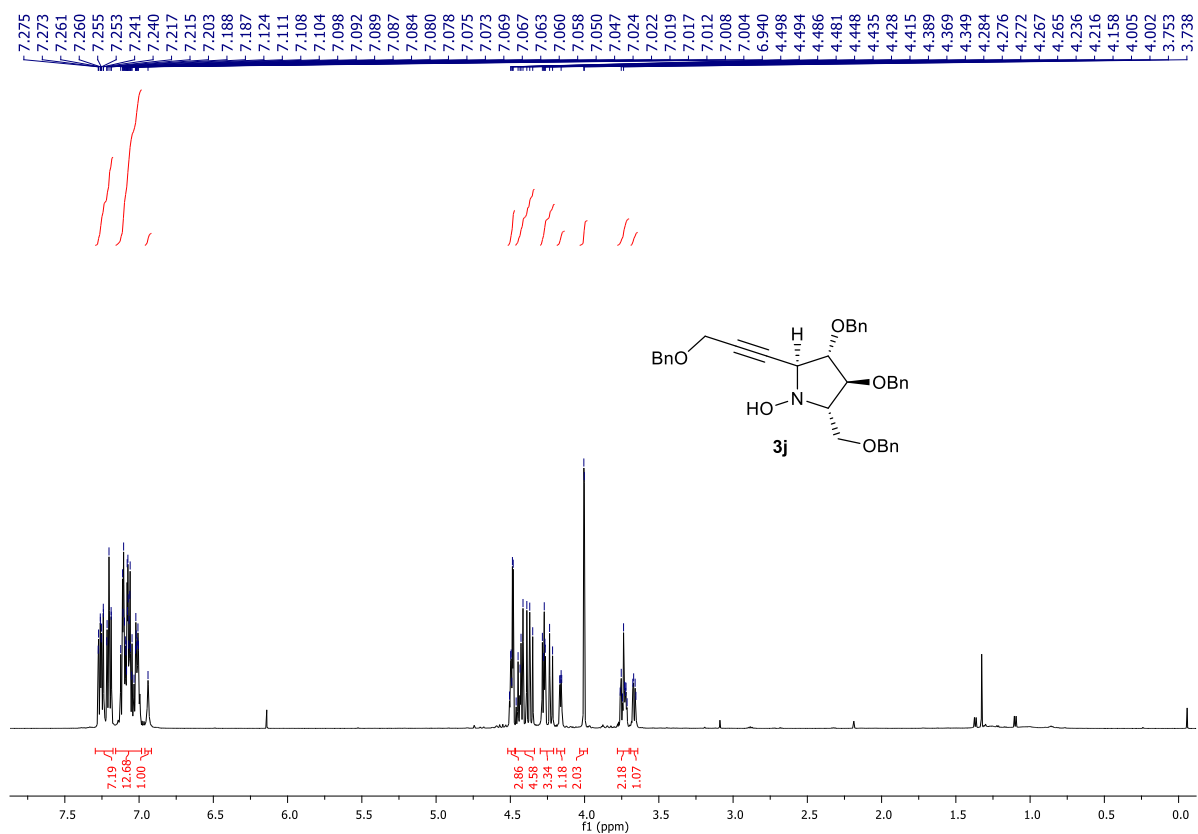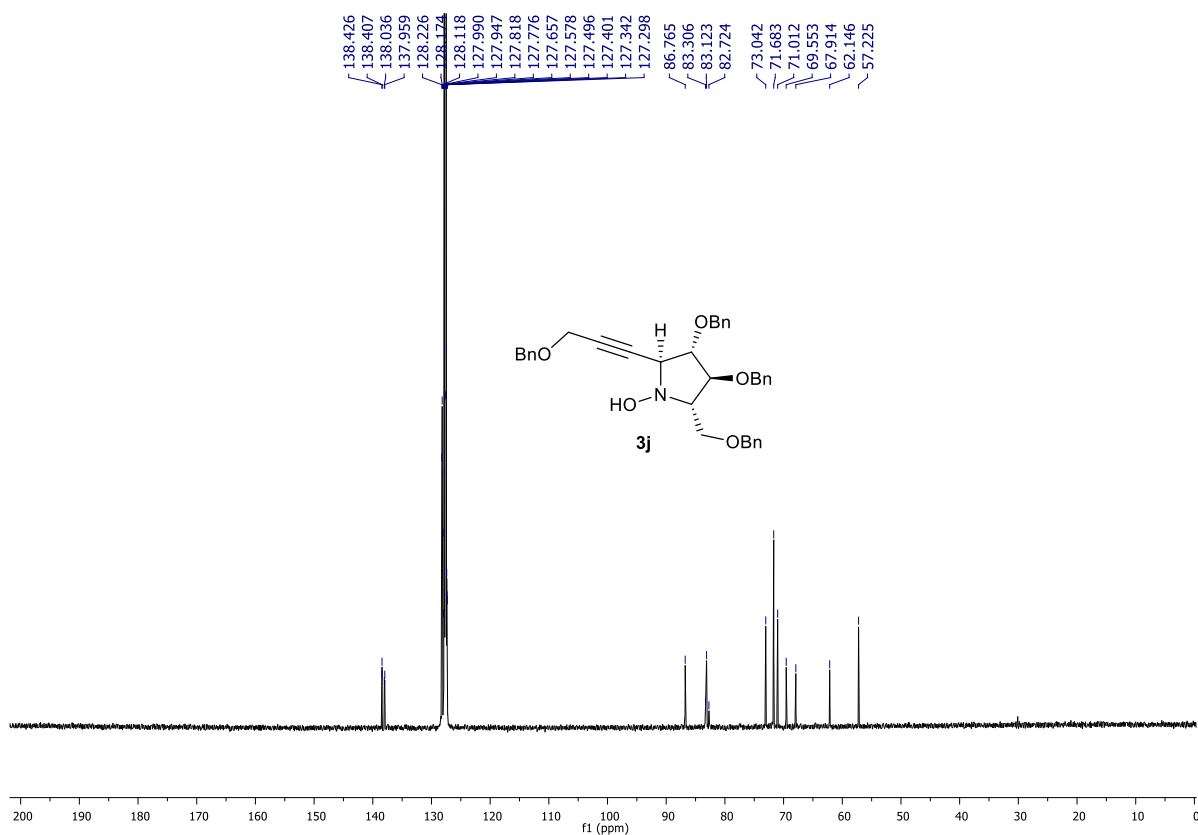

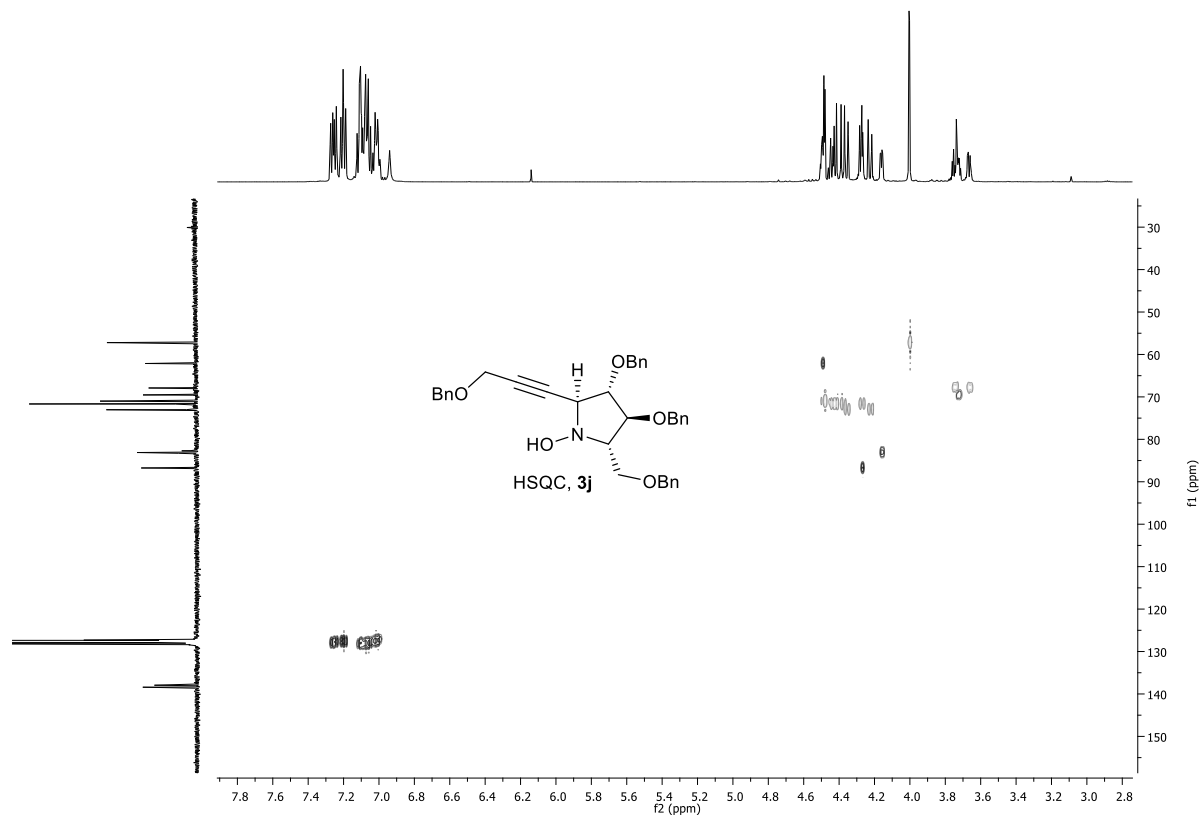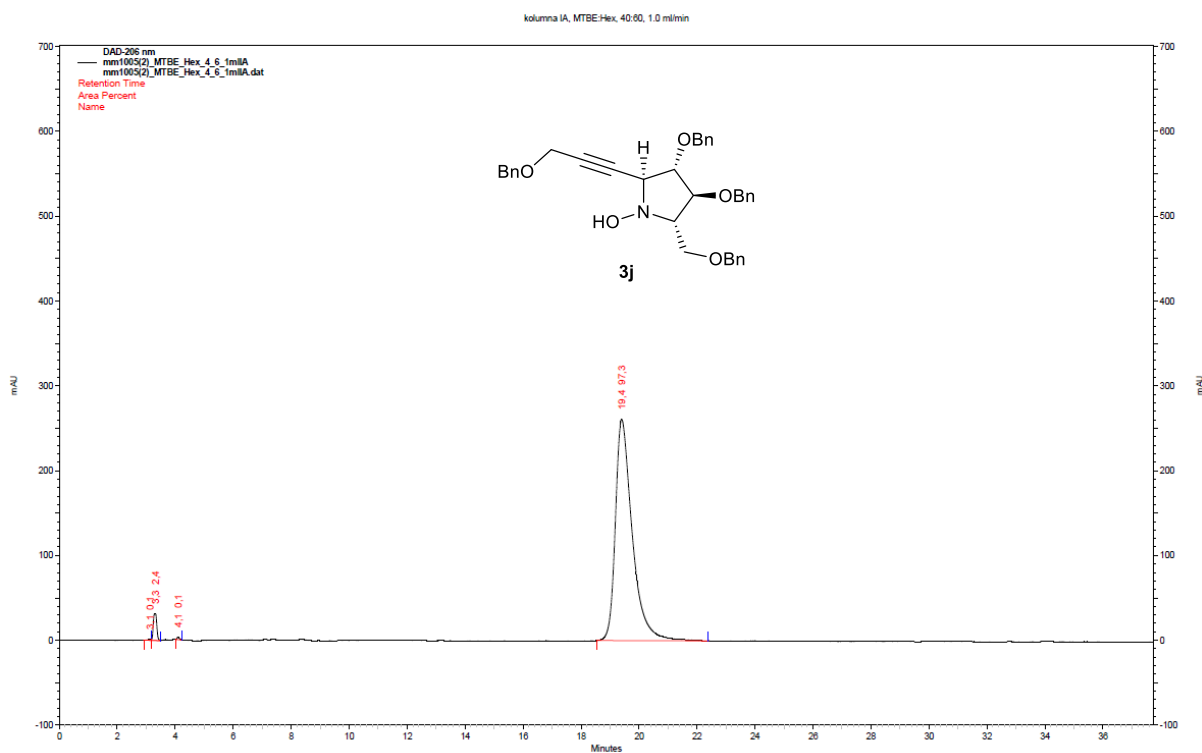

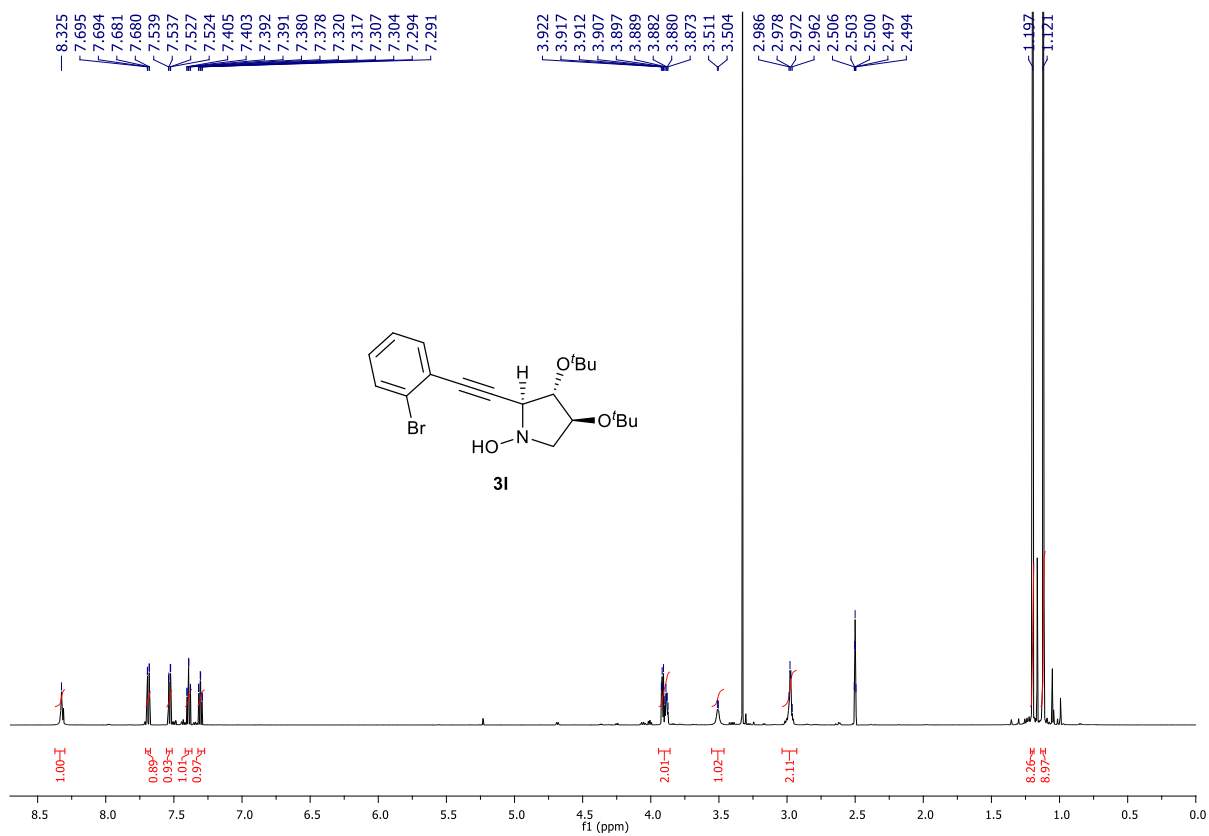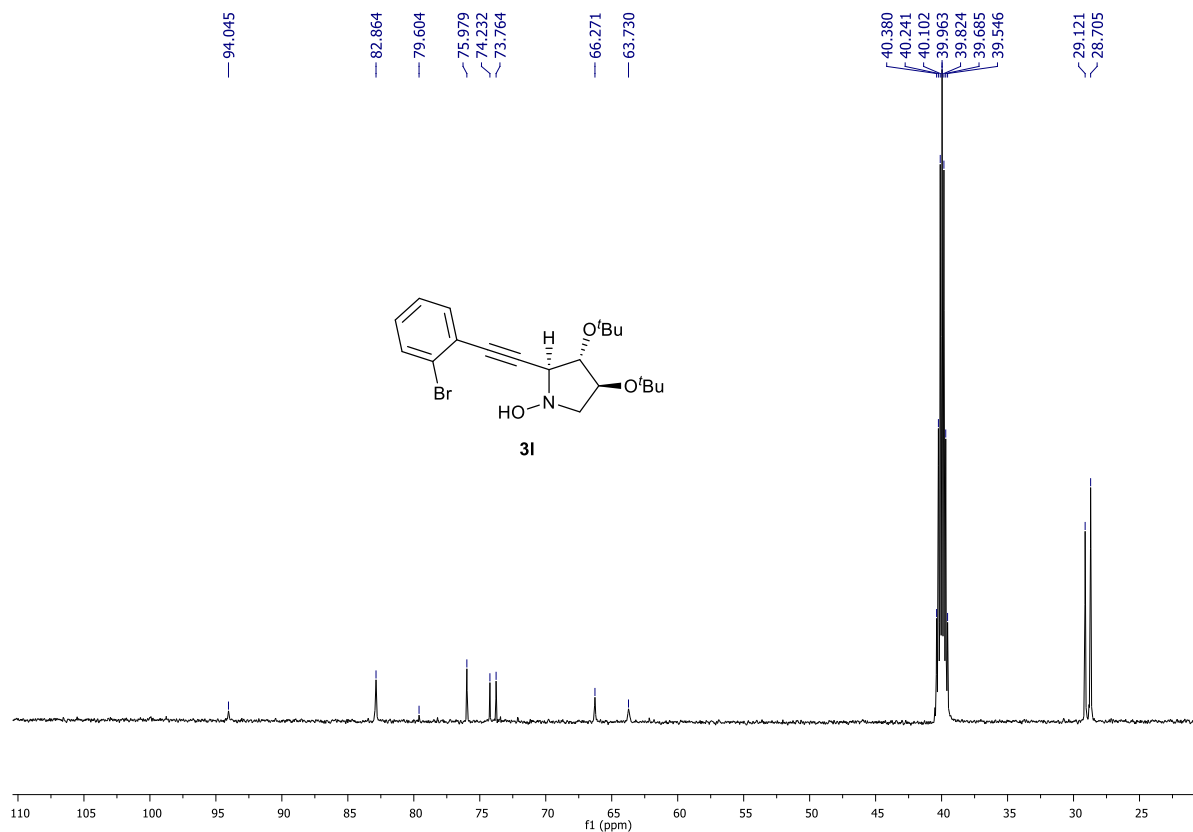

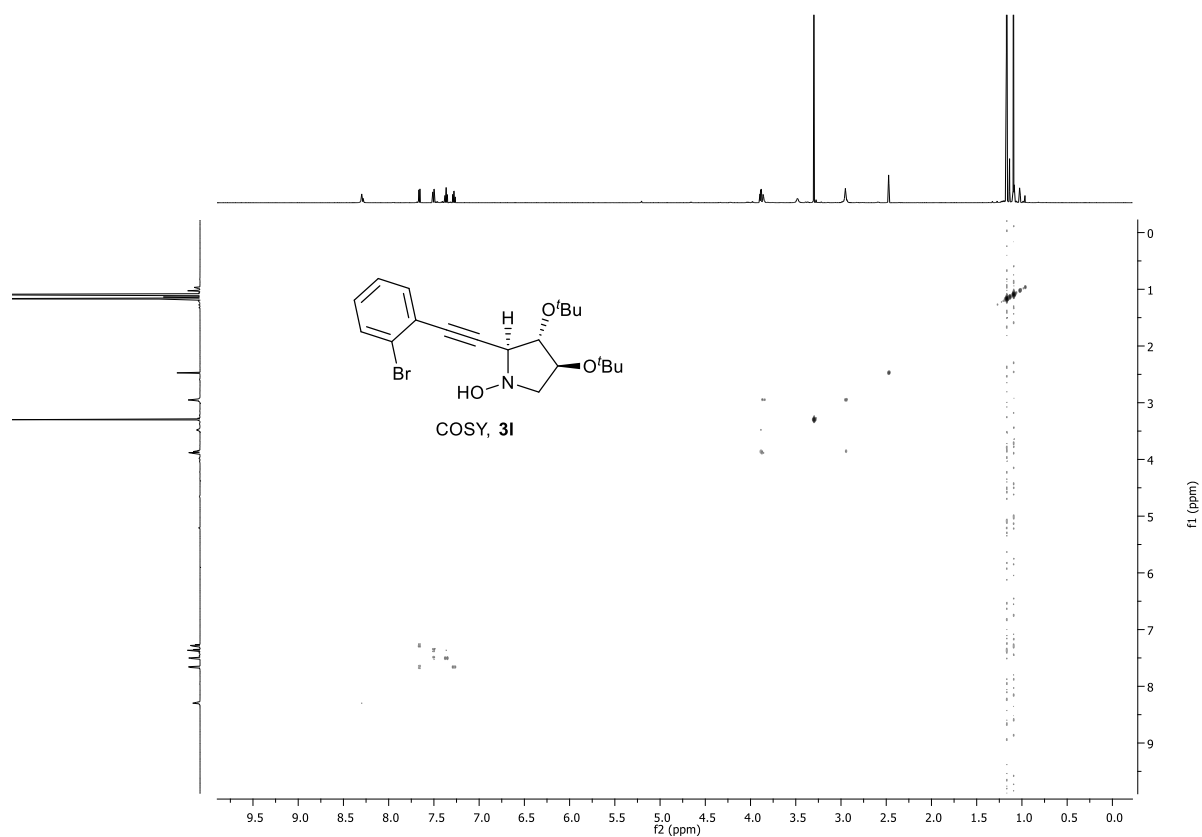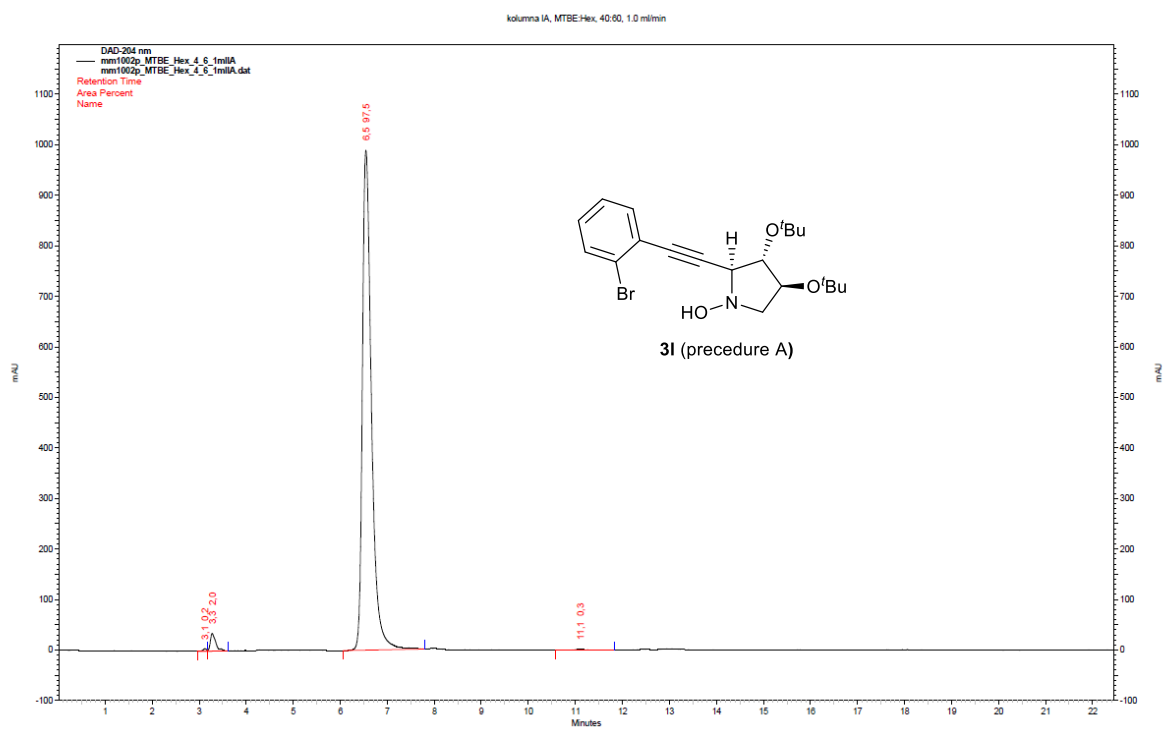



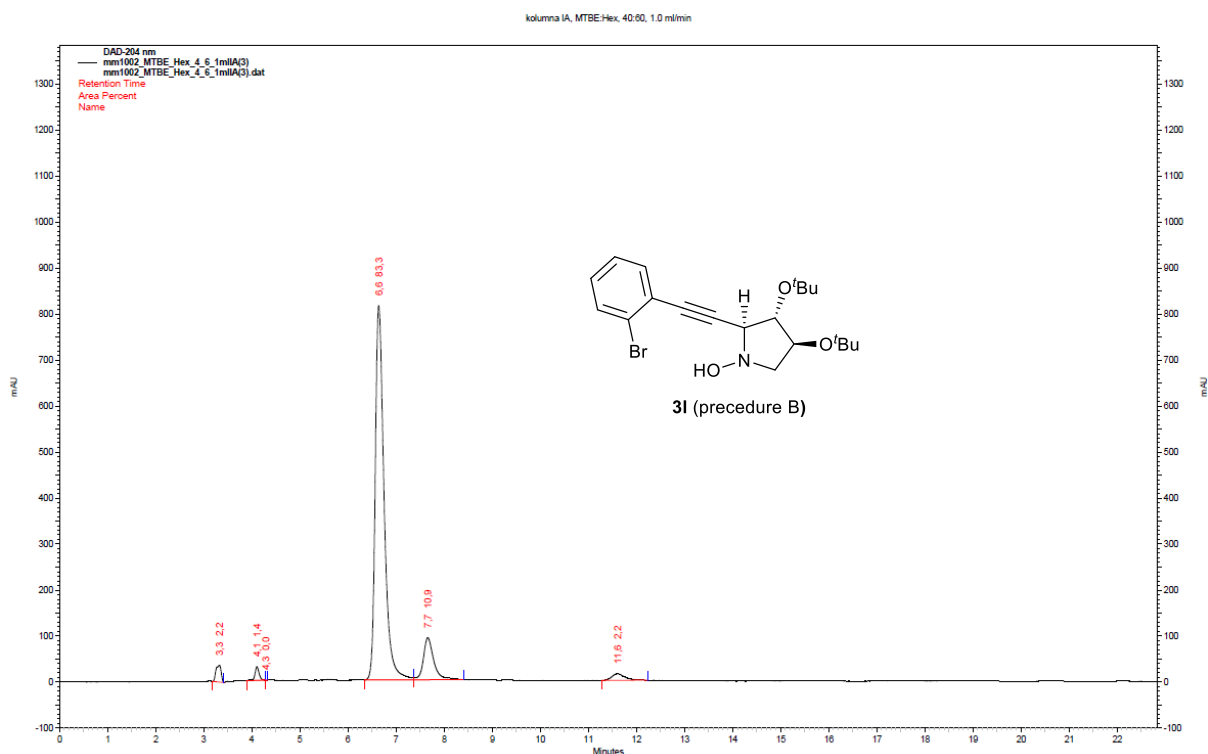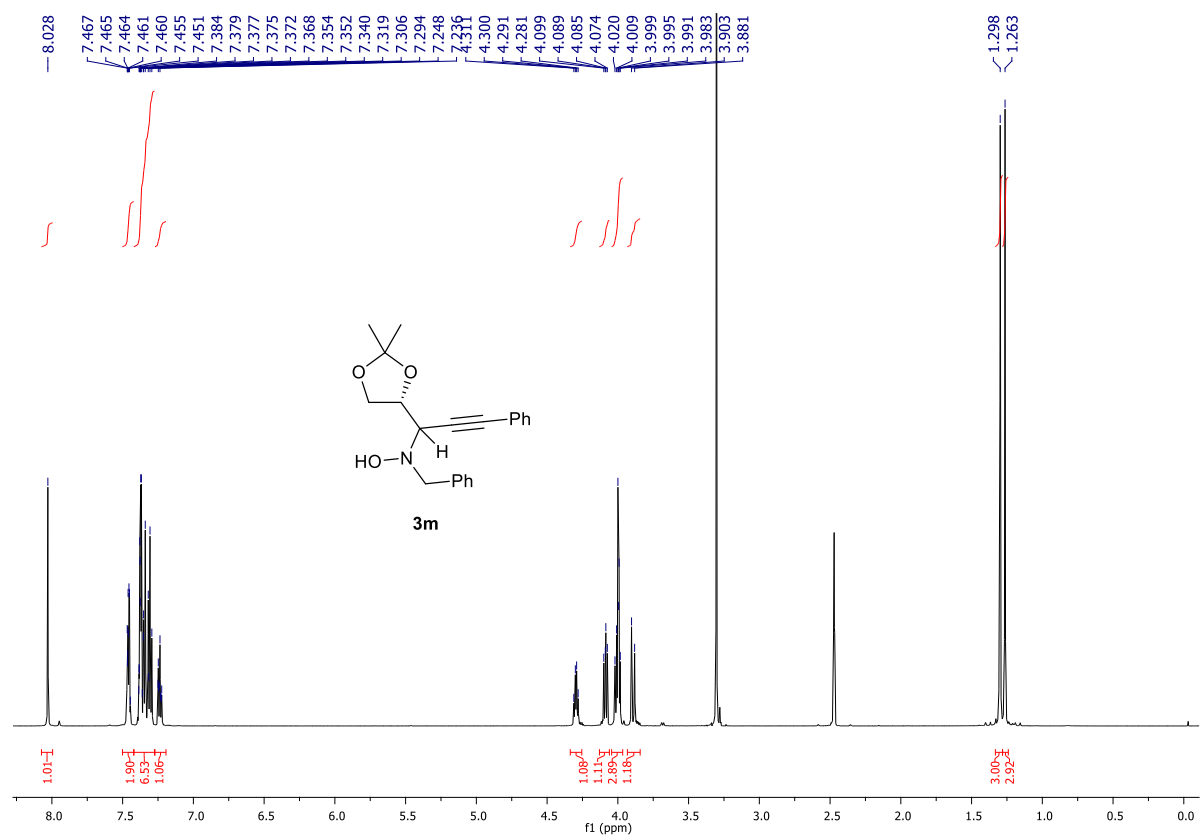

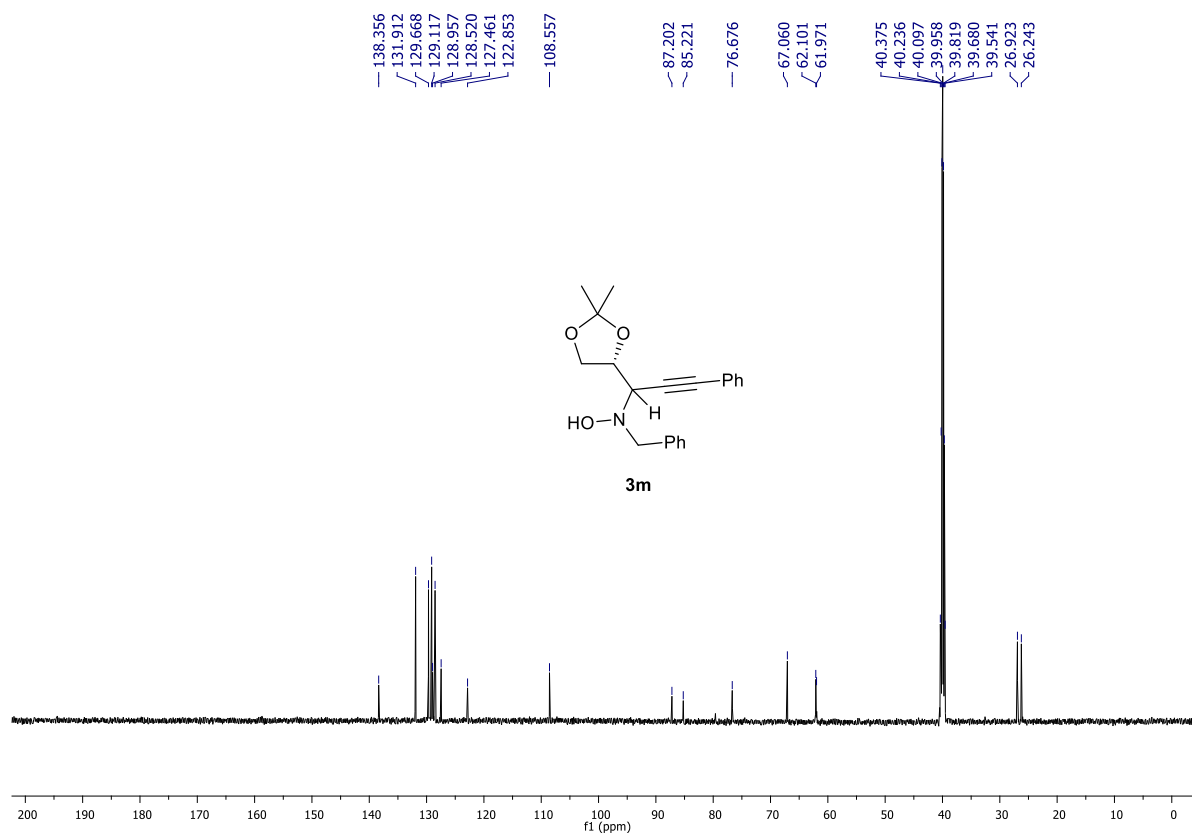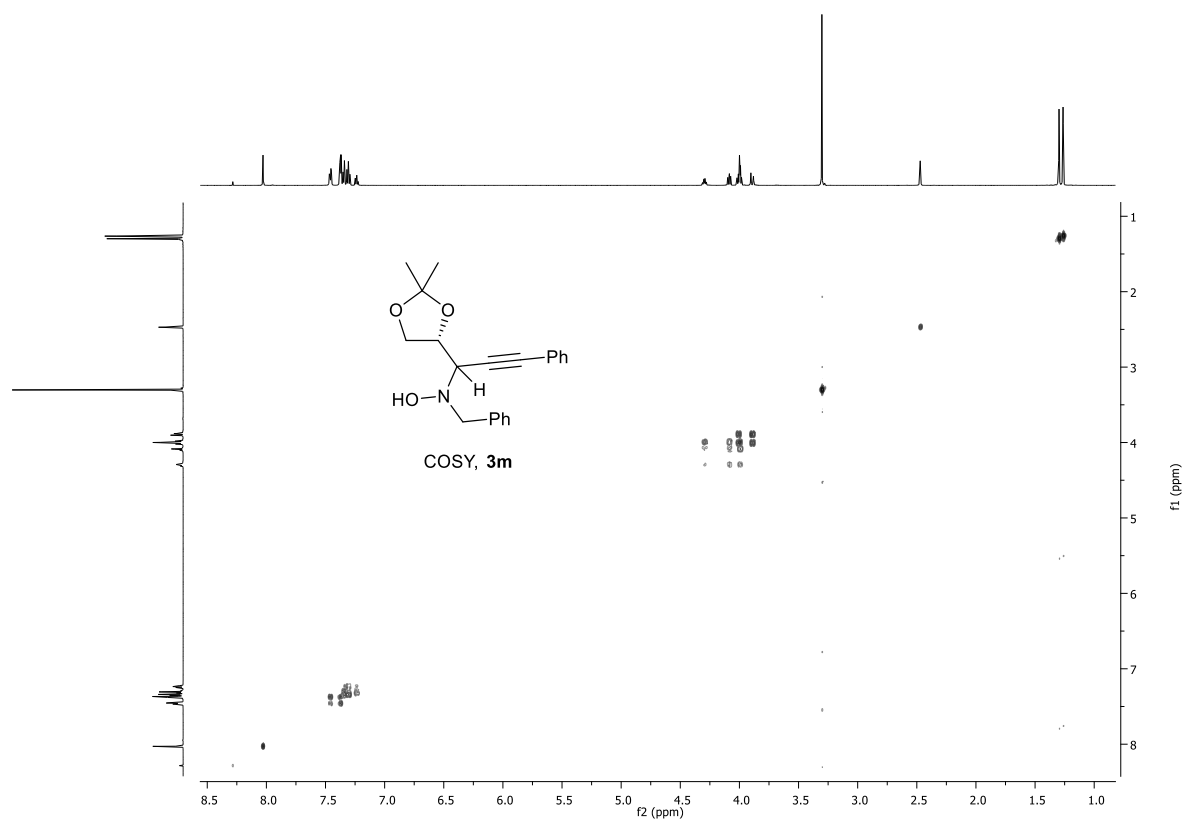

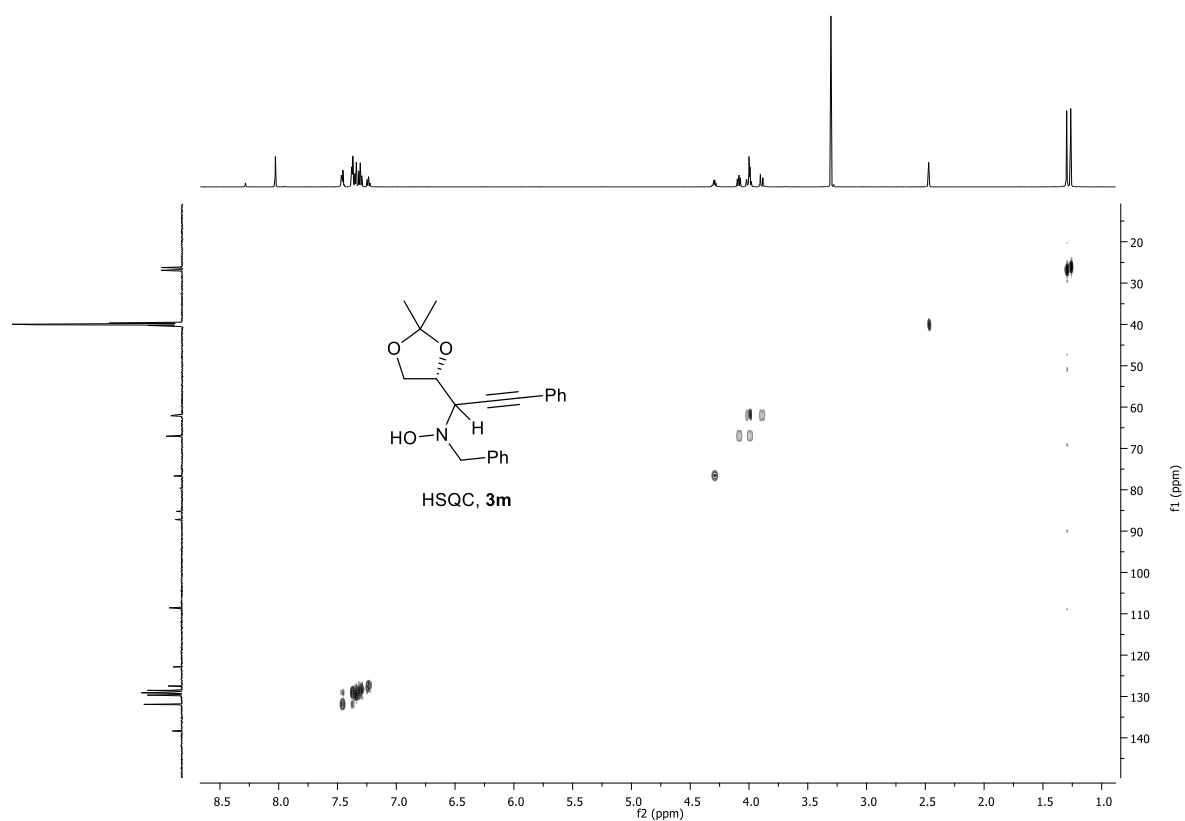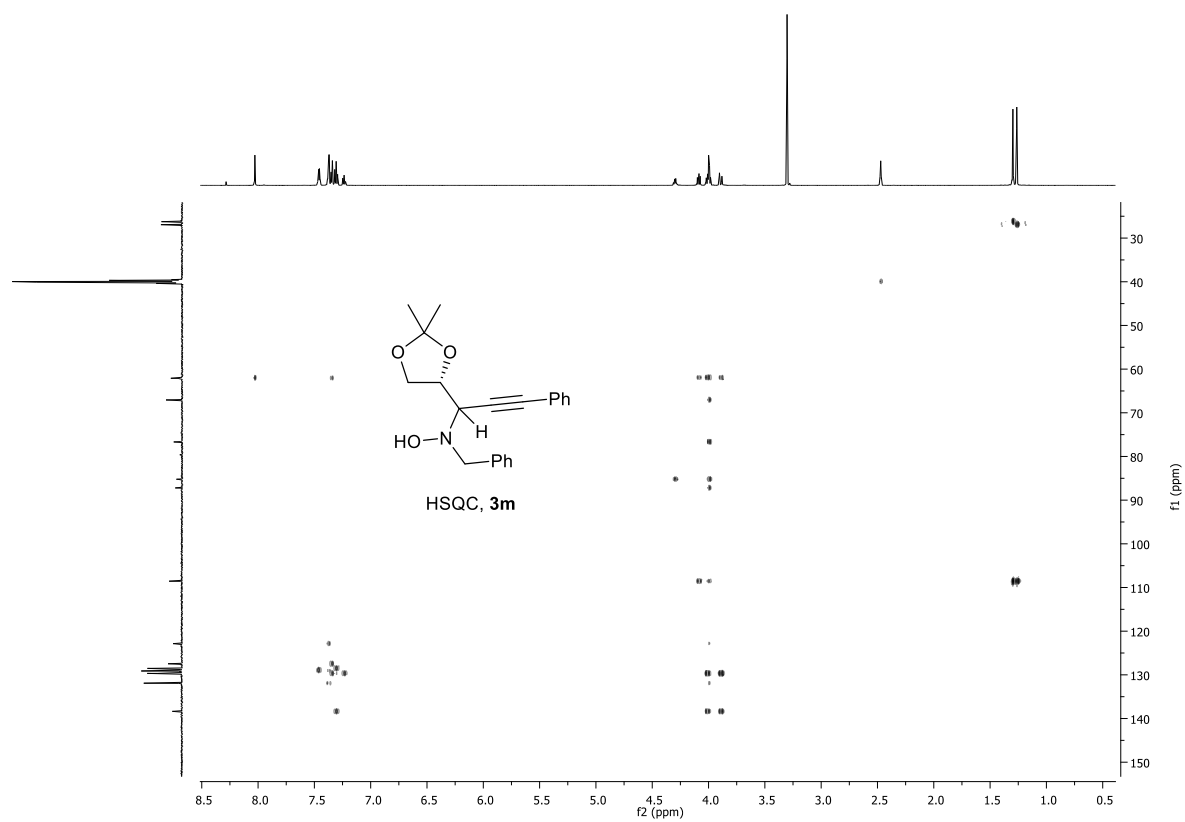

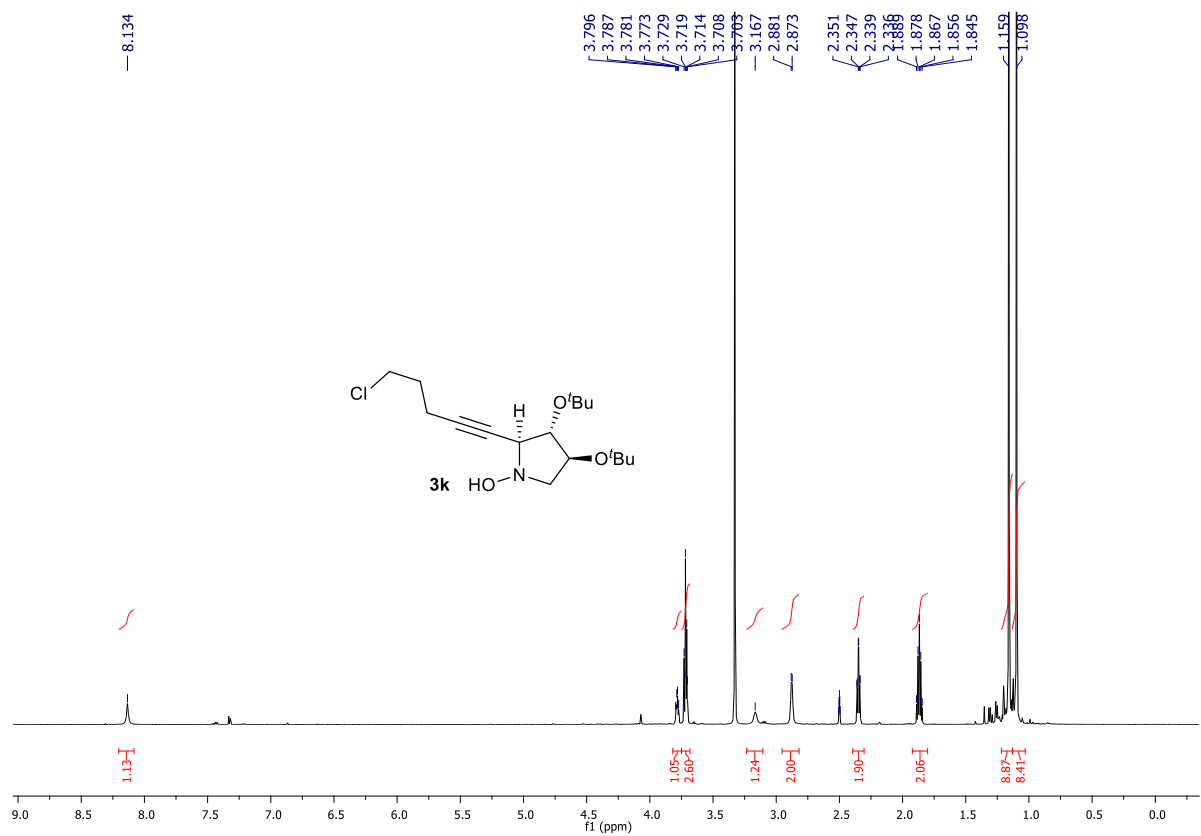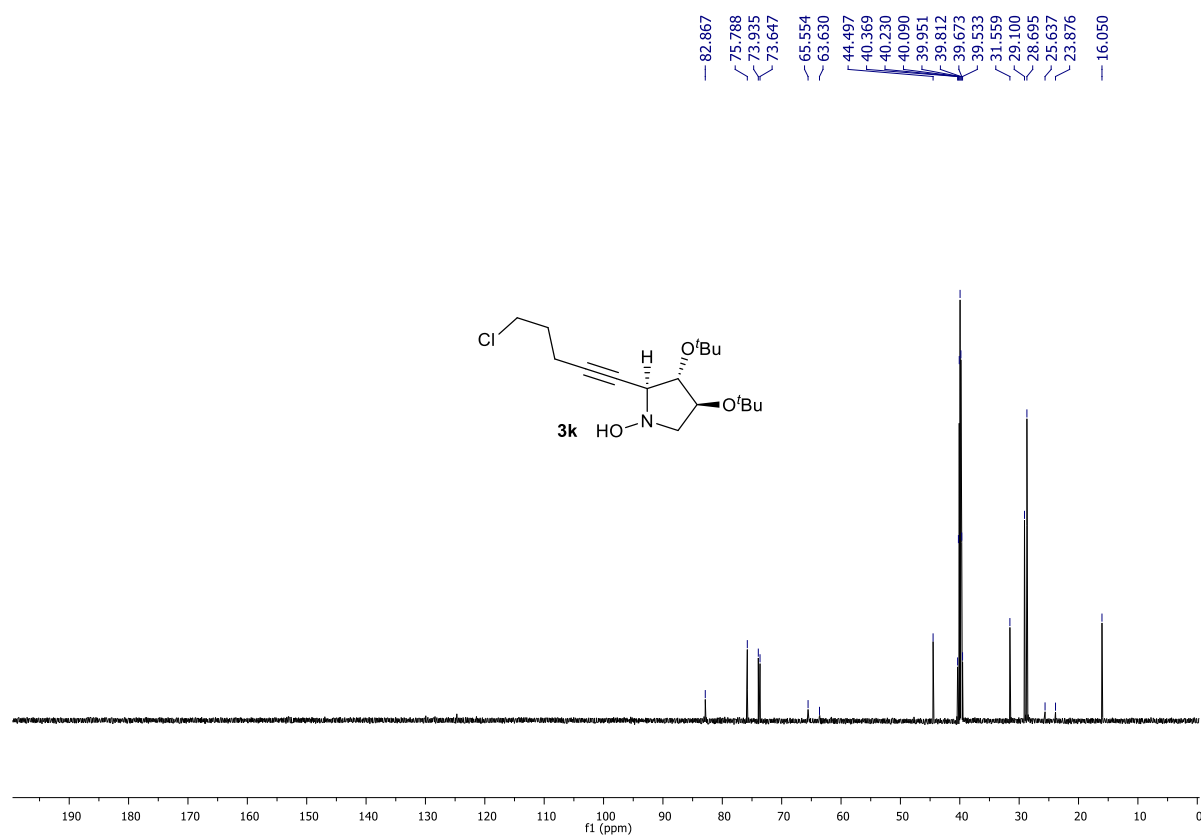

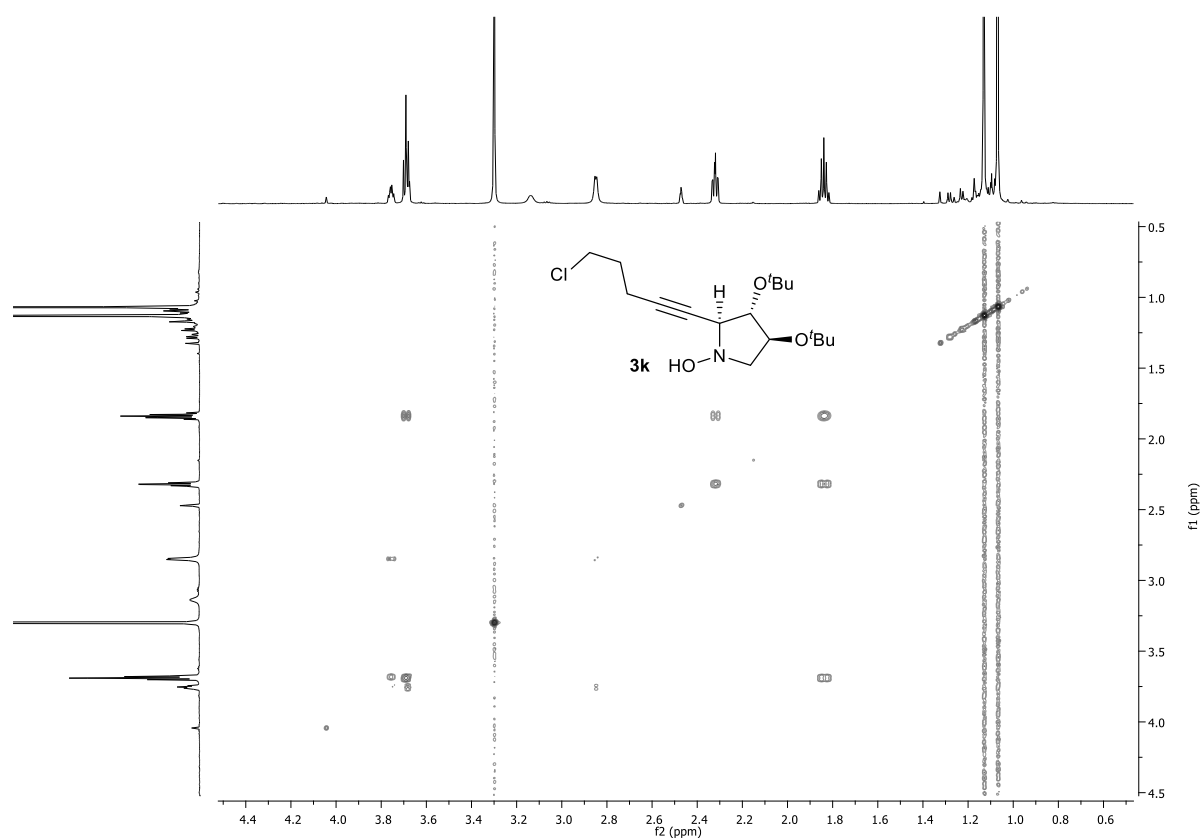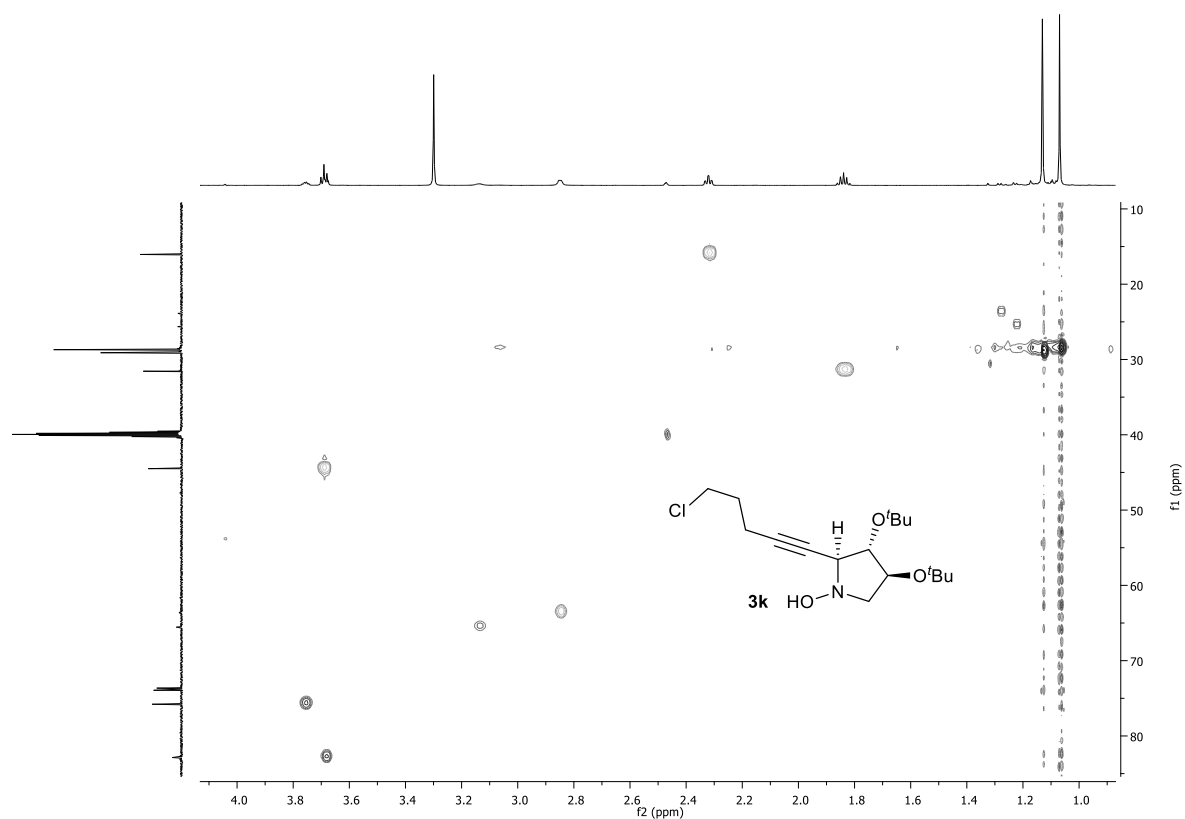

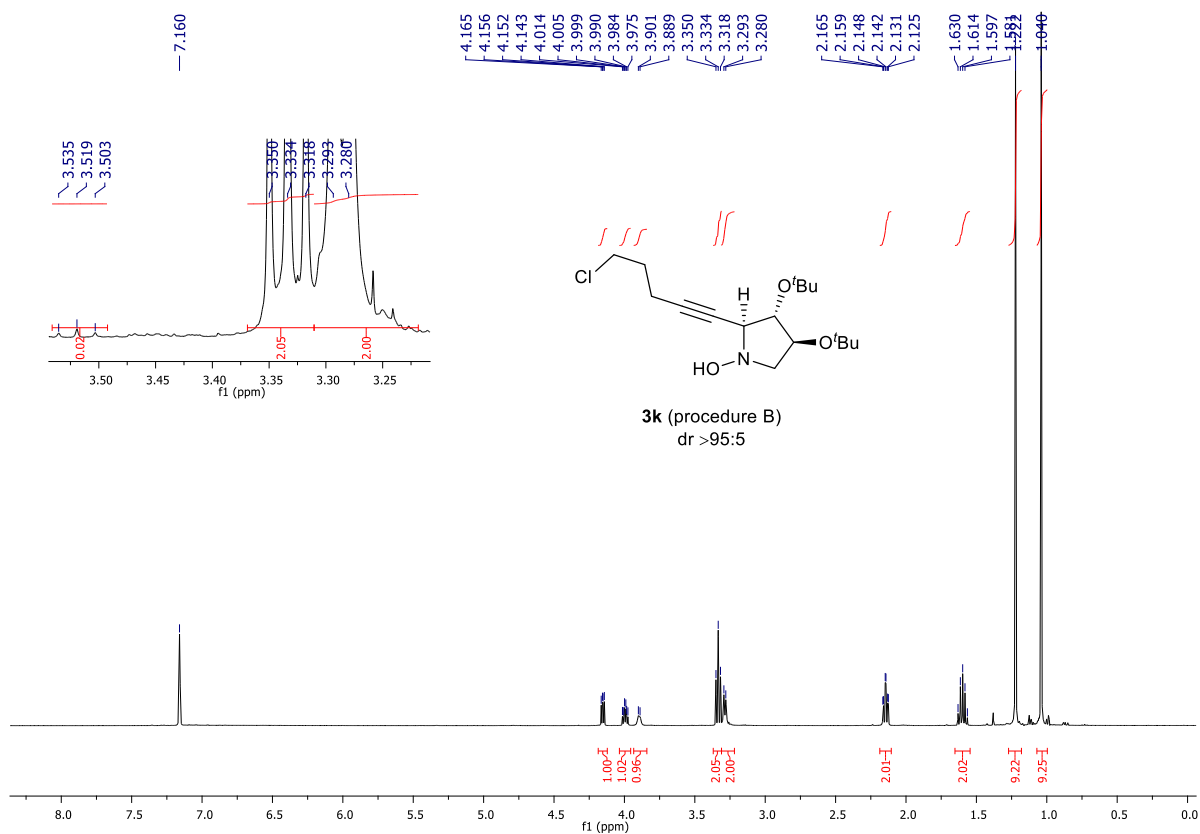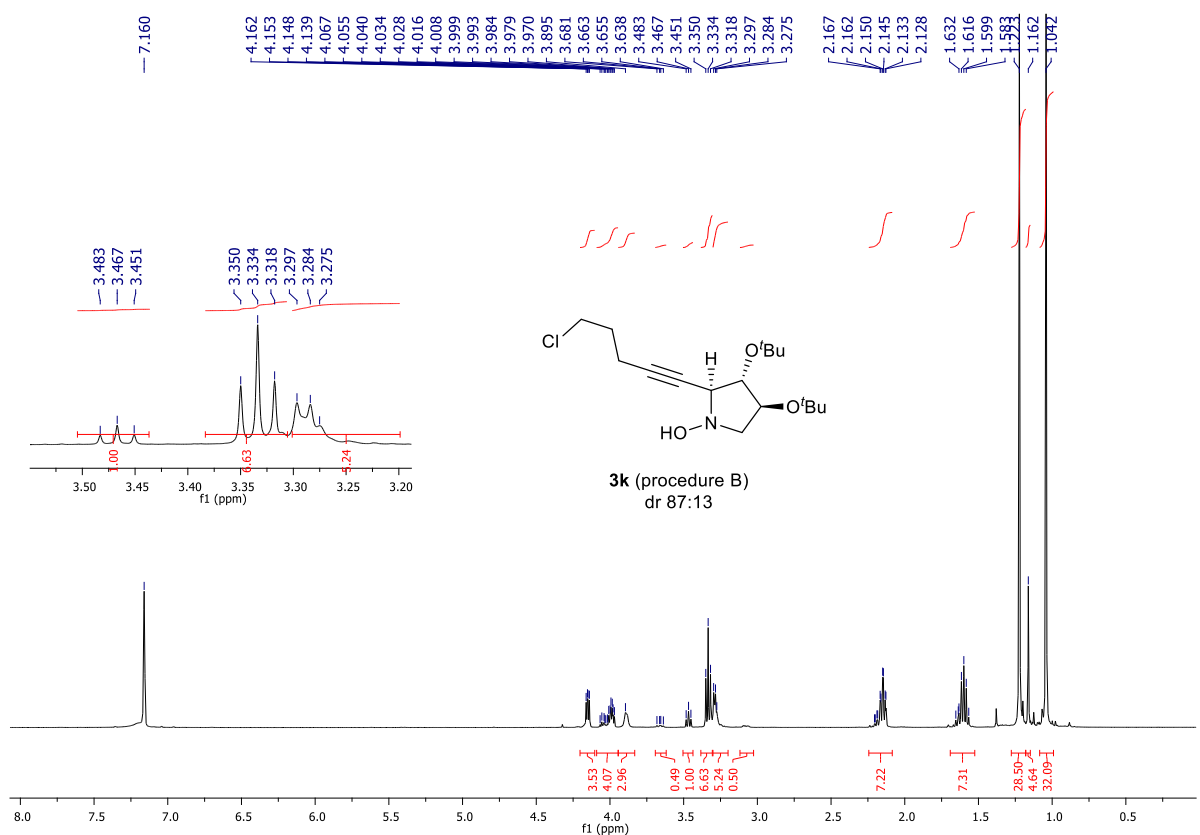

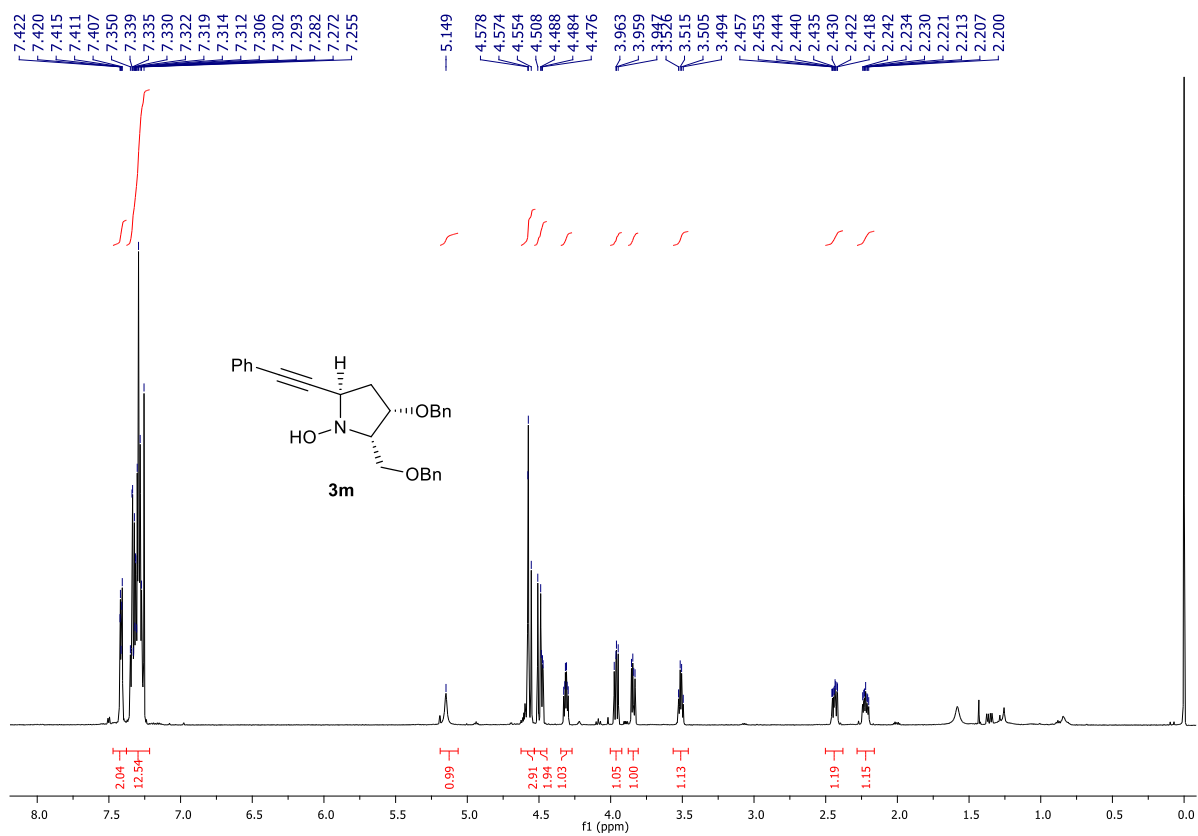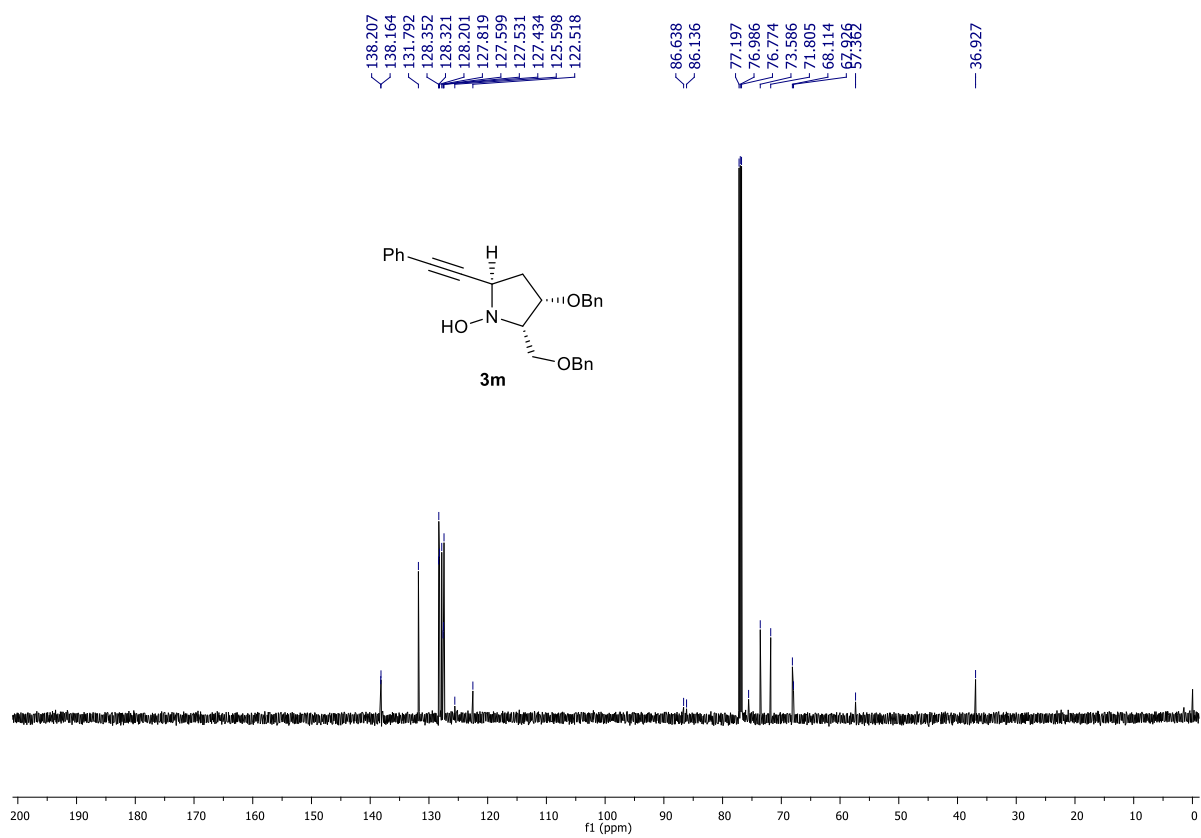

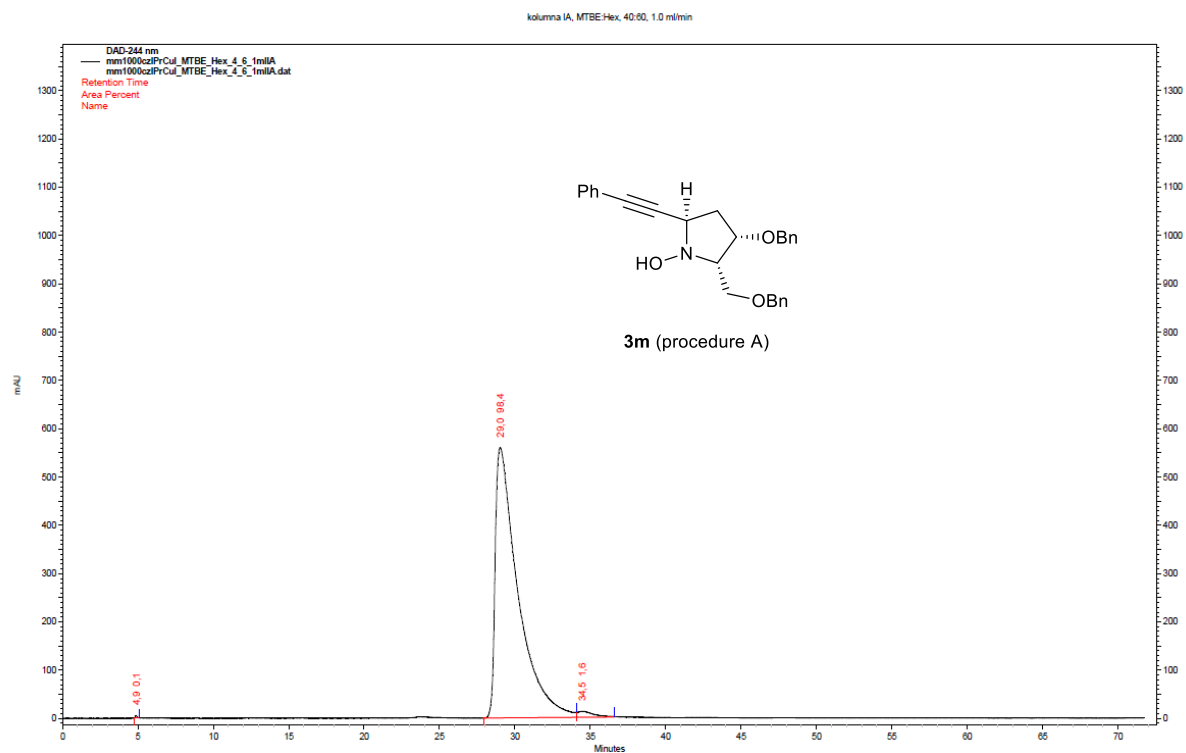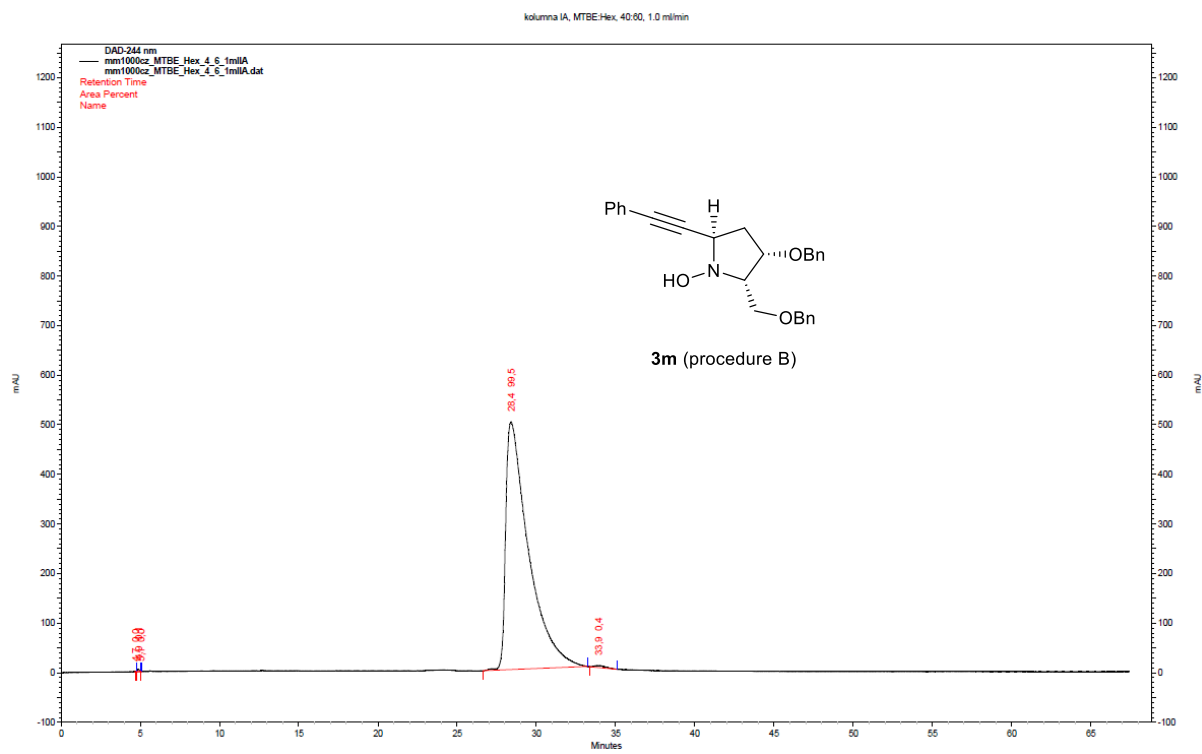



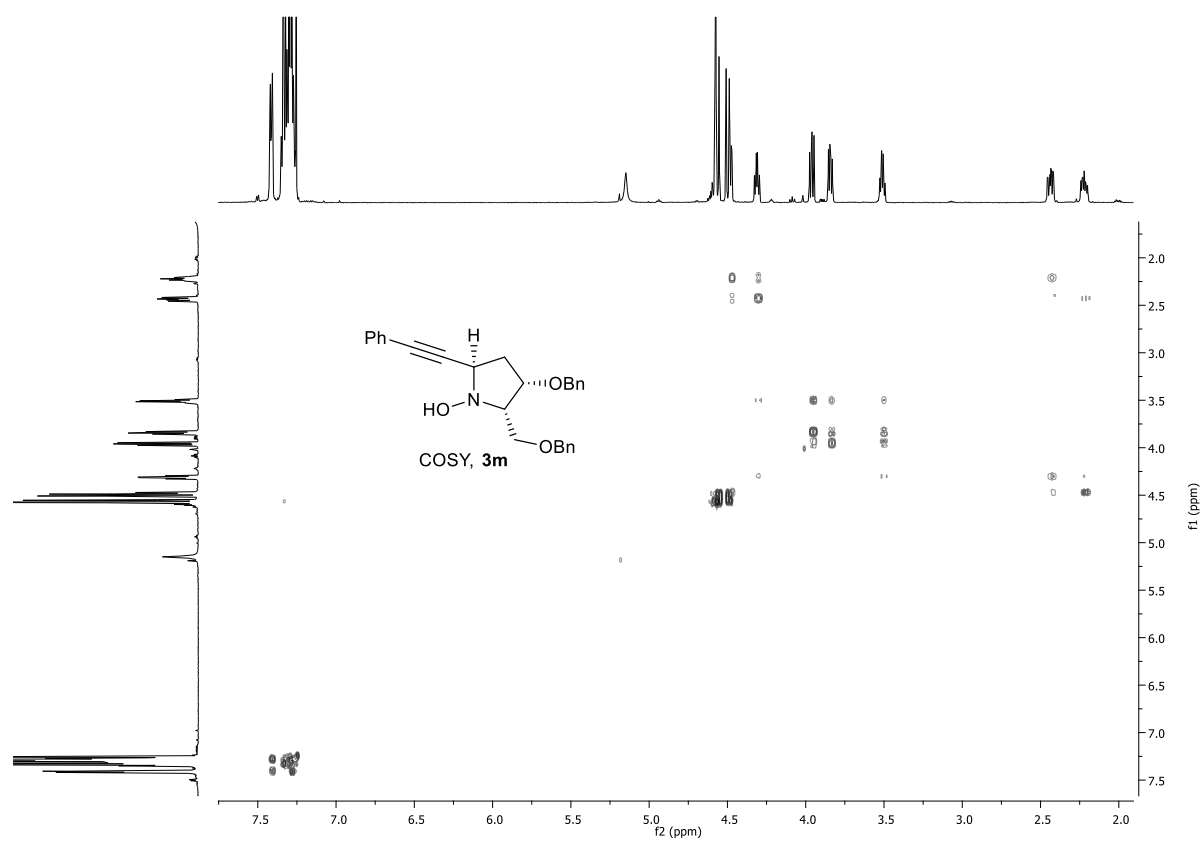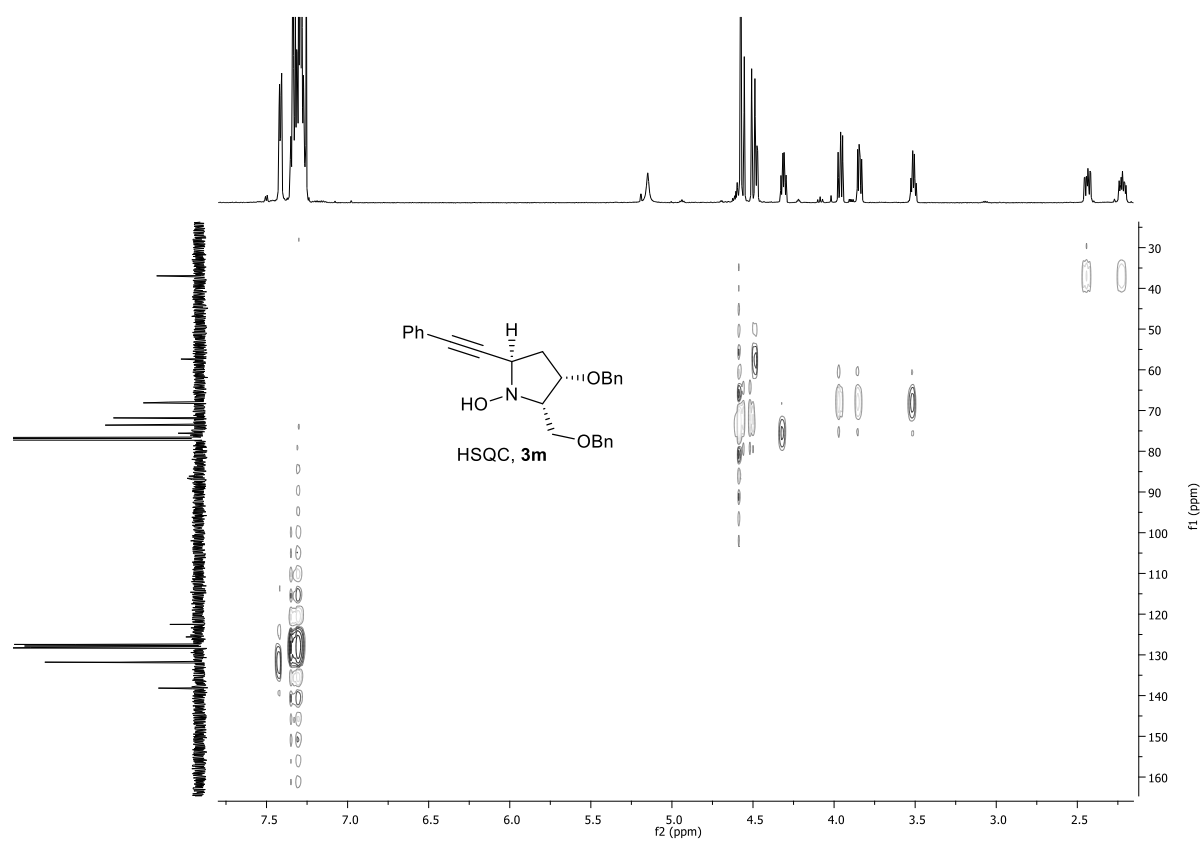

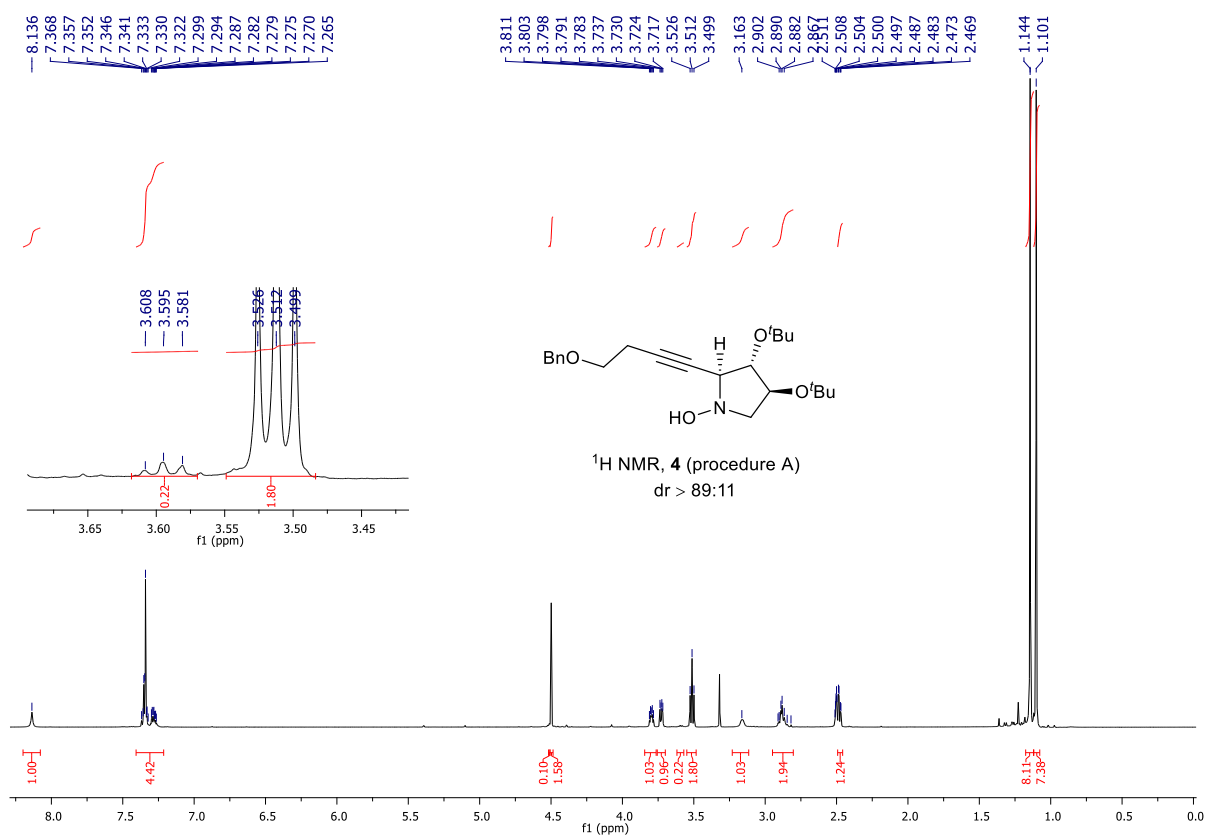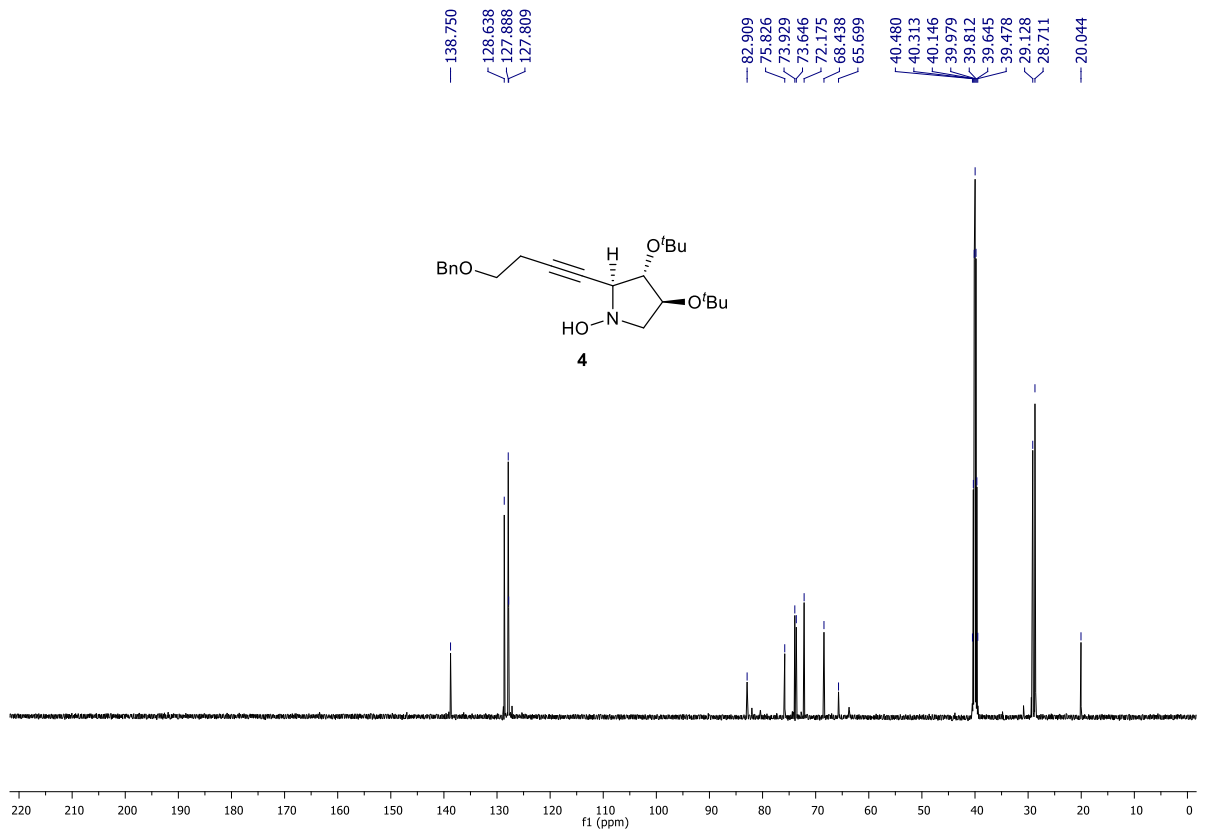

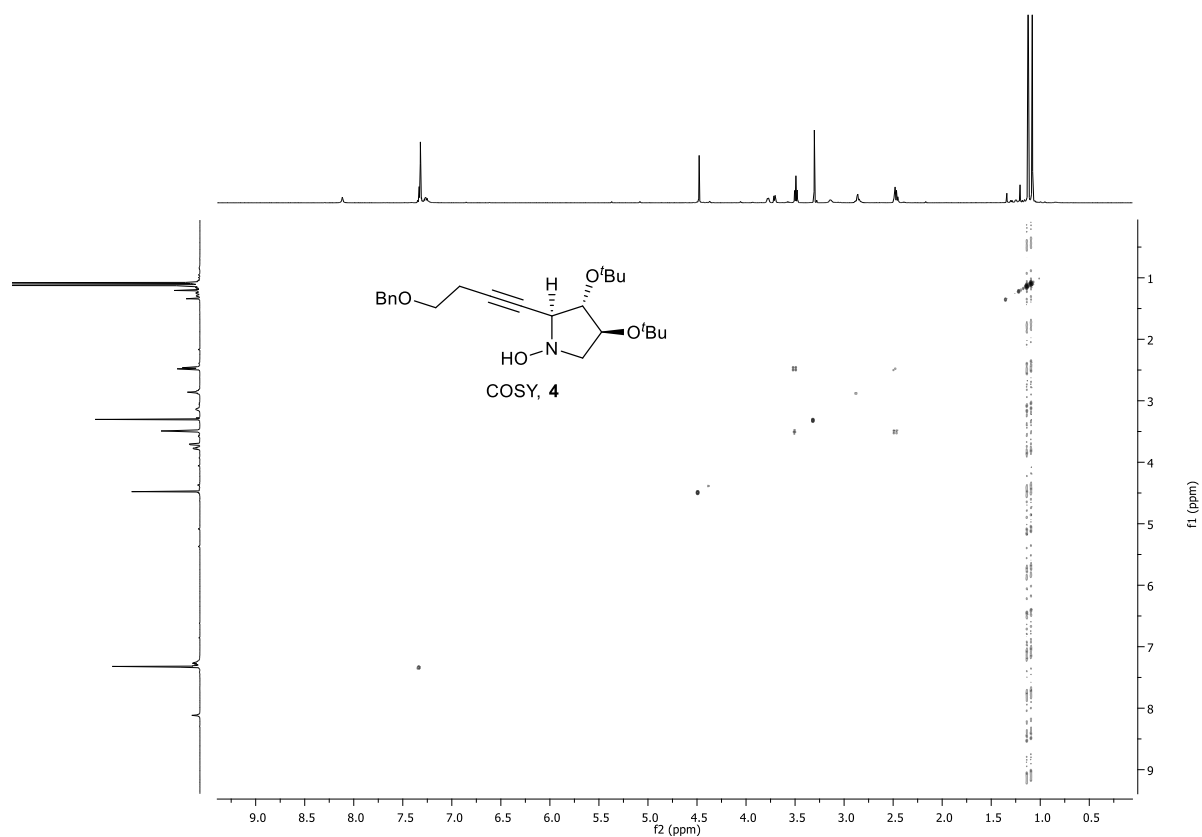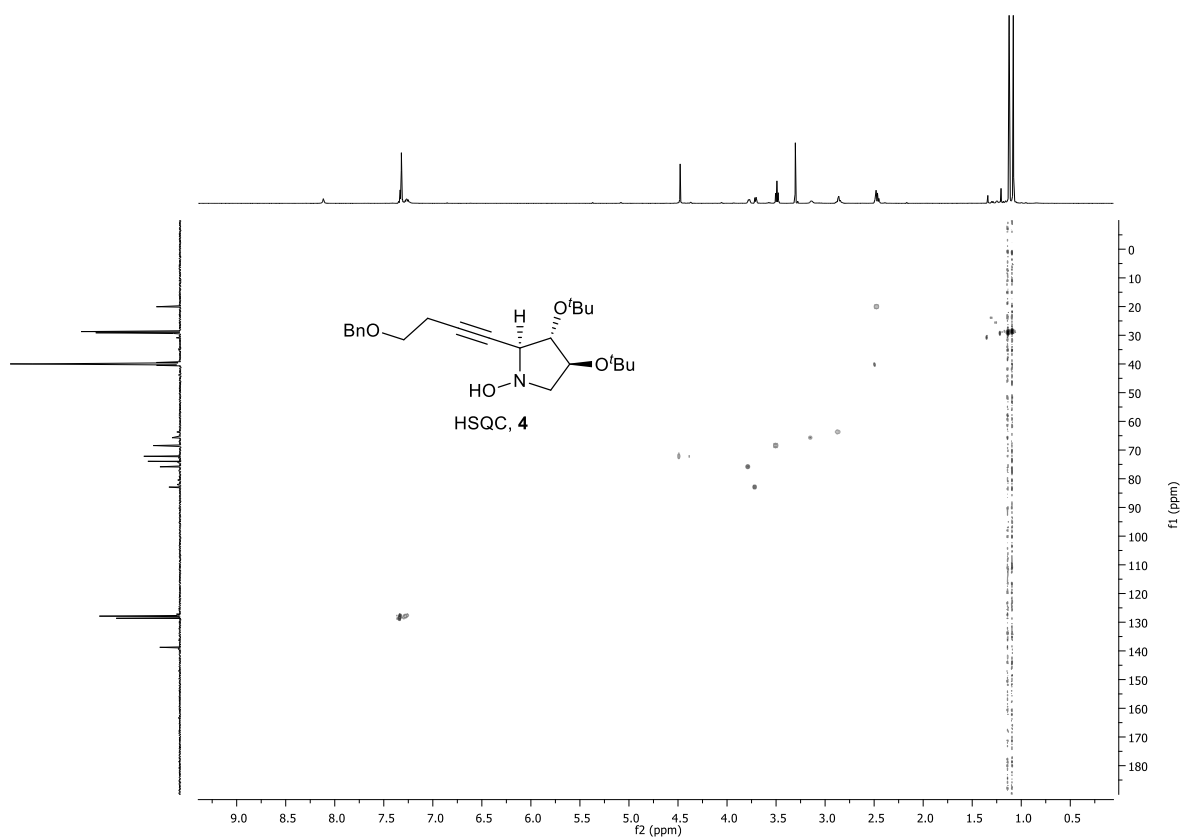

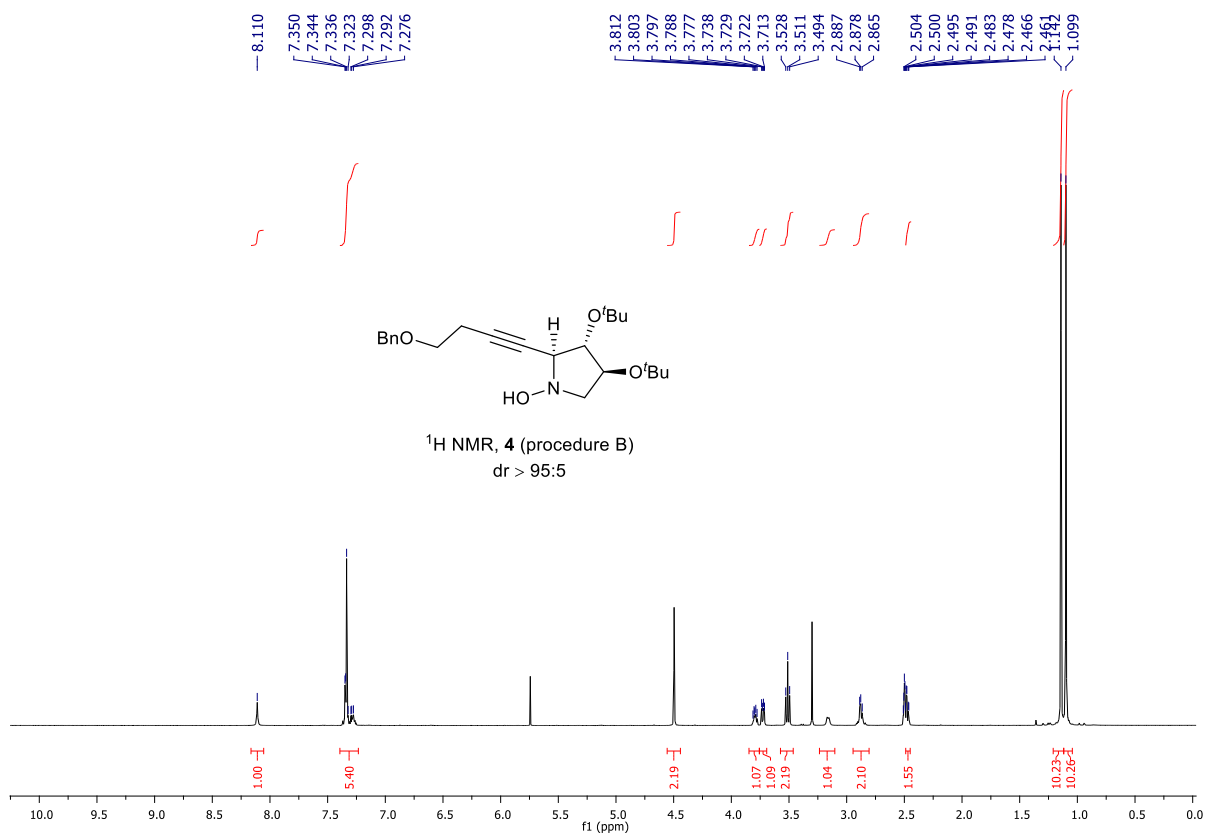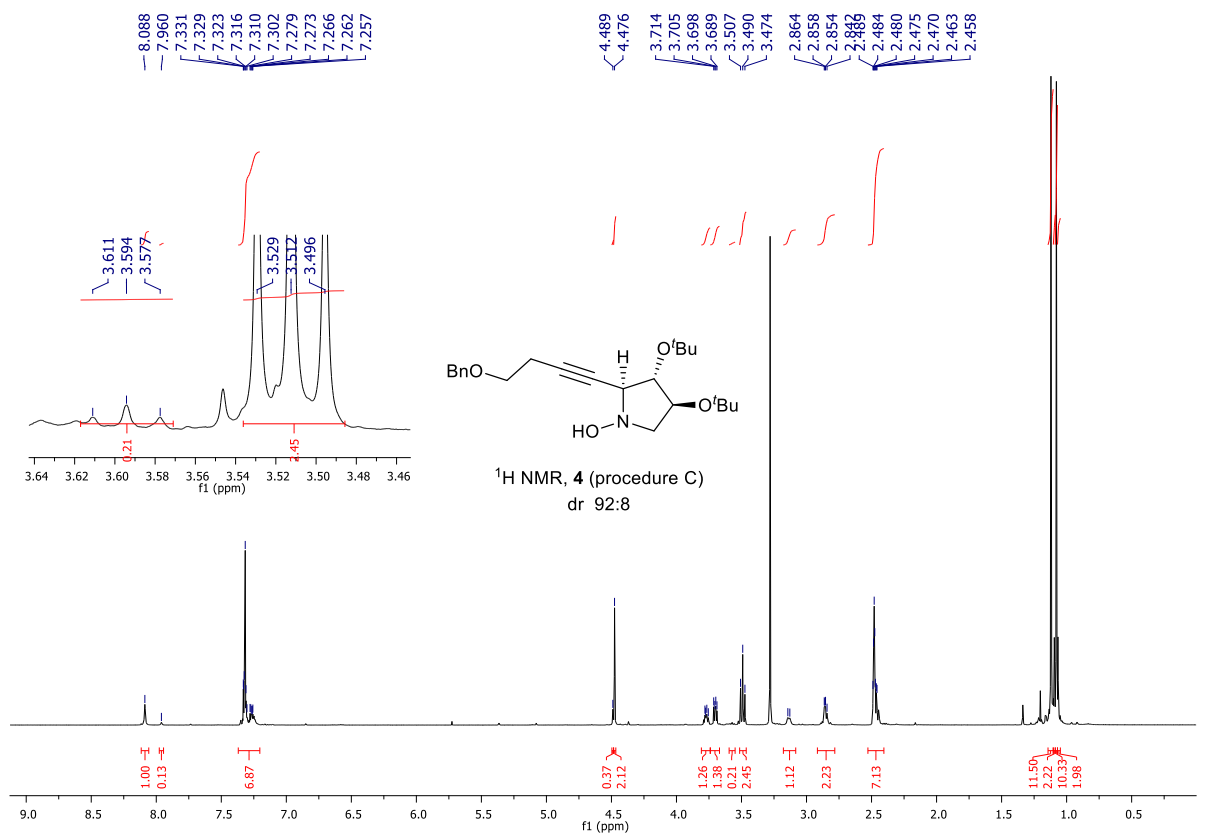

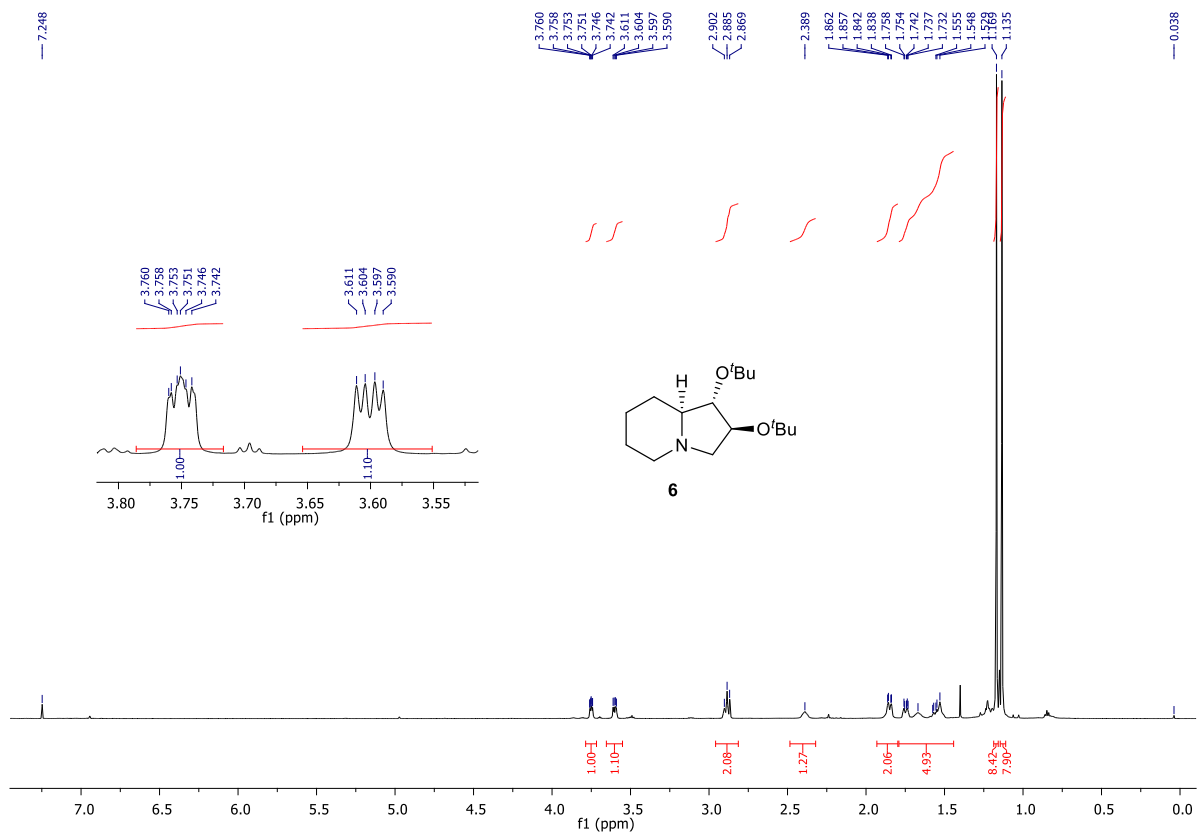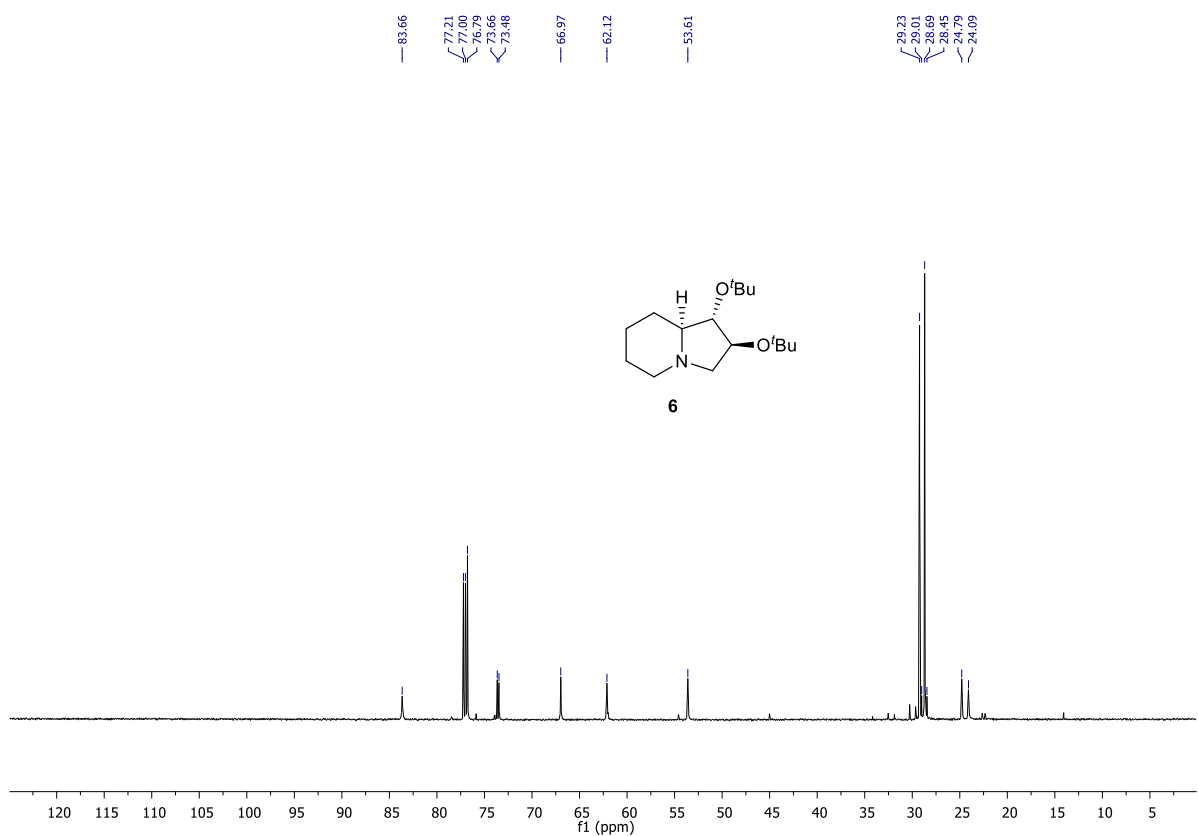

, 26-Nov-2014 + 09:13:03

Scan EI+  
TIC  
9.25e8

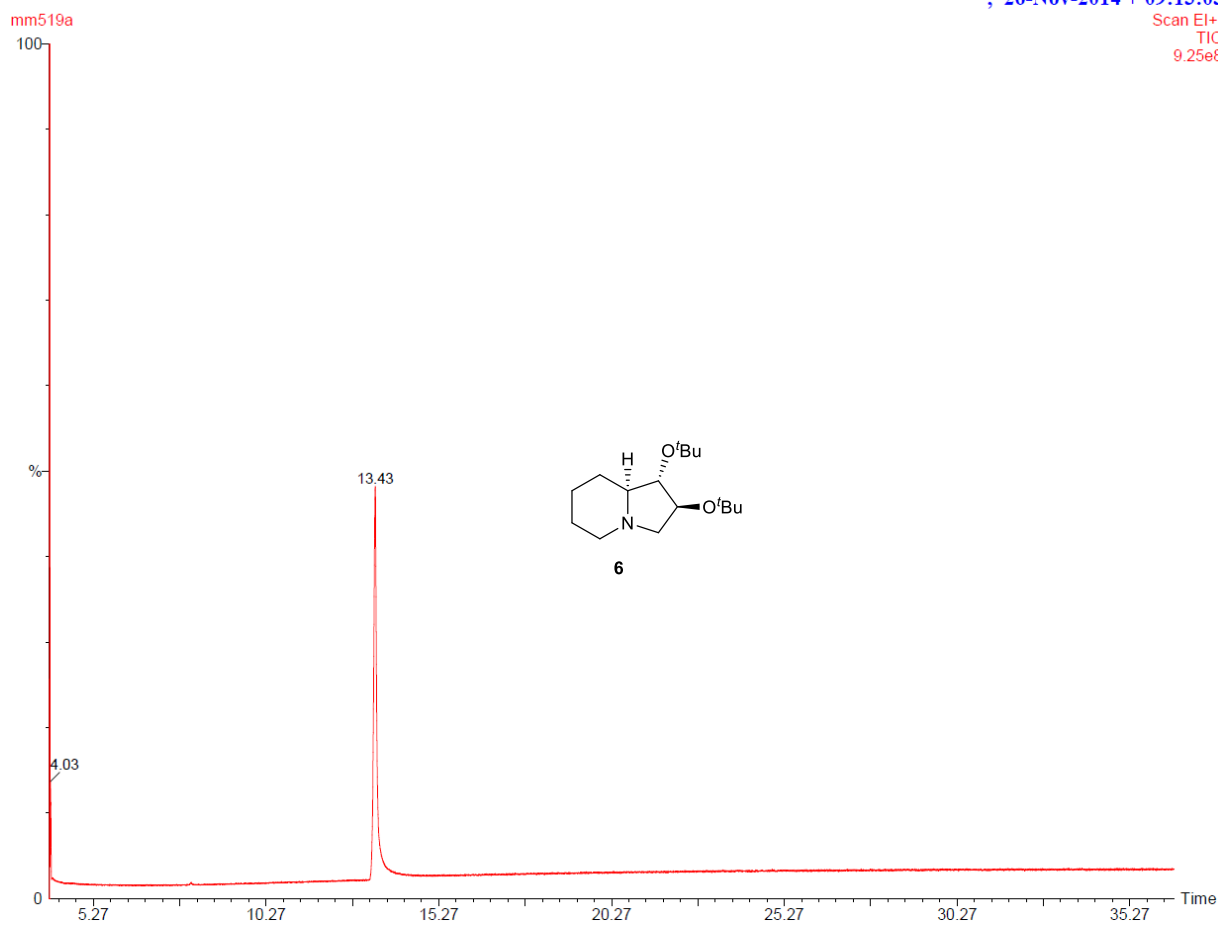

, 26-Nov-2014 + 09:13:03

Scan EI+  
4.15e7

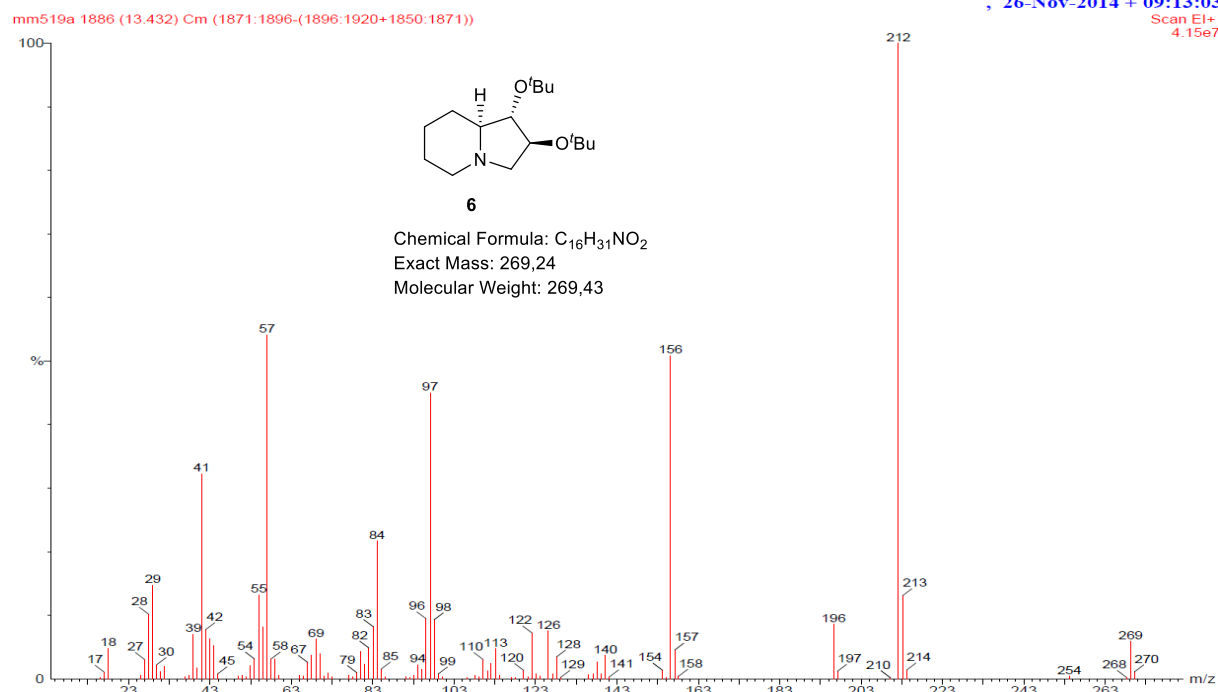

# Spectrum Report

Data file: C:\TurboMass\KRZSIEK.PRO\Data\mm519a 26-Nov-2014 09:13:03  
 Scan: 1886 (13.432)  
 Process: Cm (1874:1896-(1897:1915+1856:1872))  
 Function: Scan (15:400) EI+  
 Description:

Printed: Wed Nov 26 10:00:21 2014

| No  | Mass | Inten  | %BPI  | %TIC | No   | Mass | Inten  | %BPI   | %TIC  |
|-----|------|--------|-------|------|------|------|--------|--------|-------|
| 1:  | 16   | 7.78e4 | 0.18  | 0.03 | 54:  | 95   | 6.25e5 | 1.42   | 0.25  |
| 2:  | 17   | 4.73e5 | 1.07  | 0.19 | 55:  | 96   | 4.16e6 | 9.44   | 1.69  |
| 3:  | 18   | 2.25e6 | 5.11  | 0.91 | 56:  | 97   | 1.98e7 | 45.08  | 8.07  |
| 4:  | 26   | 2.29e5 | 0.52  | 0.09 | 57:  | 98   | 4.05e6 | 9.20   | 1.65  |
| 5:  | 27   | 1.35e6 | 3.06  | 0.55 | 58:  | 99   | 3.18e5 | 0.72   | 0.13  |
| 6:  | 28   | 4.71e6 | 10.71 | 1.92 | 59:  | 100  | 1.45e5 | 0.33   | 0.06  |
| 7:  | 29   | 6.47e6 | 14.71 | 2.63 | 60:  | 106  | 6.49e4 | 0.15   | 0.03  |
| 8:  | 30   | 9.81e5 | 2.23  | 0.40 | 61:  | 108  | 2.24e5 | 0.51   | 0.09  |
| 9:  | 31   | 4.88e5 | 1.11  | 0.20 | 62:  | 109  | 1.46e5 | 0.33   | 0.06  |
| 10: | 32   | 8.87e5 | 2.02  | 0.36 | 63:  | 110  | 1.32e6 | 3.01   | 0.54  |
| 11: | 37   | 1.38e5 | 0.31  | 0.06 | 64:  | 111  | 5.32e5 | 1.21   | 0.22  |
| 12: | 38   | 2.62e5 | 0.60  | 0.11 | 65:  | 112  | 1.06e6 | 2.42   | 0.43  |
| 13: | 39   | 3.10e6 | 7.05  | 1.26 | 66:  | 113  | 2.09e6 | 4.75   | 0.85  |
| 14: | 40   | 7.46e5 | 1.70  | 0.30 | 67:  | 114  | 2.36e5 | 0.54   | 0.10  |
| 15: | 41   | 1.43e7 | 32.45 | 5.81 | 68:  | 117  | 4.81e4 | 0.11   | 0.02  |
| 16: | 42   | 3.40e6 | 7.73  | 1.38 | 69:  | 118  | 8.78e4 | 0.20   | 0.04  |
| 17: | 43   | 2.75e6 | 6.24  | 1.12 | 70:  | 120  | 5.83e5 | 1.32   | 0.24  |
| 18: | 44   | 2.31e6 | 5.25  | 0.94 | 71:  | 121  | 1.15e5 | 0.26   | 0.05  |
| 19: | 45   | 3.35e5 | 0.76  | 0.14 | 72:  | 122  | 3.14e6 | 7.13   | 1.28  |
| 20: | 50   | 2.00e5 | 0.45  | 0.08 | 73:  | 123  | 3.20e5 | 0.73   | 0.13  |
| 21: | 51   | 2.30e5 | 0.52  | 0.09 | 74:  | 124  | 1.58e5 | 0.36   | 0.06  |
| 22: | 52   | 1.26e5 | 0.29  | 0.05 | 75:  | 126  | 3.31e6 | 7.52   | 1.35  |
| 23: | 53   | 8.83e5 | 2.01  | 0.36 | 76:  | 127  | 3.38e5 | 0.77   | 0.14  |
| 24: | 54   | 1.36e6 | 3.10  | 0.55 | 77:  | 128  | 1.51e6 | 3.44   | 0.62  |
| 25: | 55   | 5.83e6 | 13.24 | 2.37 | 78:  | 129  | 6.89e4 | 0.16   | 0.03  |
| 26: | 56   | 3.63e6 | 8.24  | 1.47 | 79:  | 136  | 3.13e5 | 0.71   | 0.13  |
| 27: | 57   | 2.38e7 | 54.06 | 9.67 | 80:  | 137  | 3.79e5 | 0.86   | 0.15  |
| 28: | 58   | 1.35e6 | 3.08  | 0.55 | 81:  | 138  | 1.18e6 | 2.67   | 0.48  |
| 29: | 59   | 1.37e6 | 3.12  | 0.56 | 82:  | 139  | 3.29e5 | 0.75   | 0.13  |
| 30: | 60   | 2.15e5 | 0.49  | 0.09 | 83:  | 140  | 1.62e6 | 3.67   | 0.66  |
| 31: | 65   | 2.46e5 | 0.56  | 0.10 | 84:  | 141  | 1.19e5 | 0.27   | 0.05  |
| 32: | 66   | 1.66e5 | 0.38  | 0.07 | 85:  | 154  | 5.91e5 | 1.34   | 0.24  |
| 33: | 67   | 1.10e6 | 2.49  | 0.45 | 86:  | 155  | 8.78e4 | 0.20   | 0.04  |
| 34: | 68   | 1.62e6 | 3.67  | 0.66 | 87:  | 156  | 2.25e7 | 51.13  | 9.15  |
| 35: | 69   | 2.72e6 | 6.17  | 1.10 | 88:  | 157  | 1.96e6 | 4.46   | 0.80  |
| 36: | 70   | 1.70e6 | 3.85  | 0.69 | 89:  | 158  | 1.54e5 | 0.35   | 0.06  |
| 37: | 71   | 1.88e5 | 0.43  | 0.08 | 90:  | 193  | 4.51e4 | 0.10   | 0.02  |
| 38: | 72   | 3.92e5 | 0.89  | 0.16 | 91:  | 196  | 3.76e6 | 8.55   | 1.53  |
| 39: | 73   | 1.21e5 | 0.28  | 0.05 | 92:  | 197  | 5.12e5 | 1.16   | 0.21  |
| 40: | 77   | 2.41e5 | 0.55  | 0.10 | 93:  | 210  | 5.59e4 | 0.13   | 0.02  |
| 41: | 78   | 1.60e5 | 0.36  | 0.07 | 94:  | 212  | 4.40e7 | 100.00 | 17.89 |
| 42: | 79   | 4.29e5 | 0.98  | 0.17 | 95:  | 213  | 5.70e6 | 12.95  | 2.32  |
| 43: | 80   | 1.89e6 | 4.29  | 0.77 | 96:  | 214  | 5.73e5 | 1.30   | 0.23  |
| 44: | 81   | 1.00e6 | 2.28  | 0.41 | 97:  | 254  | 1.64e5 | 0.37   | 0.07  |
| 45: | 82   | 2.13e6 | 4.84  | 0.87 | 98:  | 268  | 8.17e4 | 0.19   | 0.03  |
| 46: | 83   | 3.60e6 | 8.17  | 1.46 | 99:  | 269  | 2.60e6 | 5.91   | 1.06  |
| 47: | 84   | 9.57e6 | 21.75 | 3.89 | 100: | 270  | 4.61e5 | 1.05   | 0.19  |
| 48: | 85   | 6.49e5 | 1.47  | 0.26 |      |      |        |        |       |
| 49: | 86   | 1.04e5 | 0.24  | 0.04 |      |      |        |        |       |
| 50: | 91   | 1.45e5 | 0.33  | 0.06 |      |      |        |        |       |
| 51: | 92   | 4.86e4 | 0.11  | 0.02 |      |      |        |        |       |
| 52: | 93   | 2.51e5 | 0.57  | 0.10 |      |      |        |        |       |
| 53: | 94   | 9.68e5 | 2.20  | 0.39 |      |      |        |        |       |

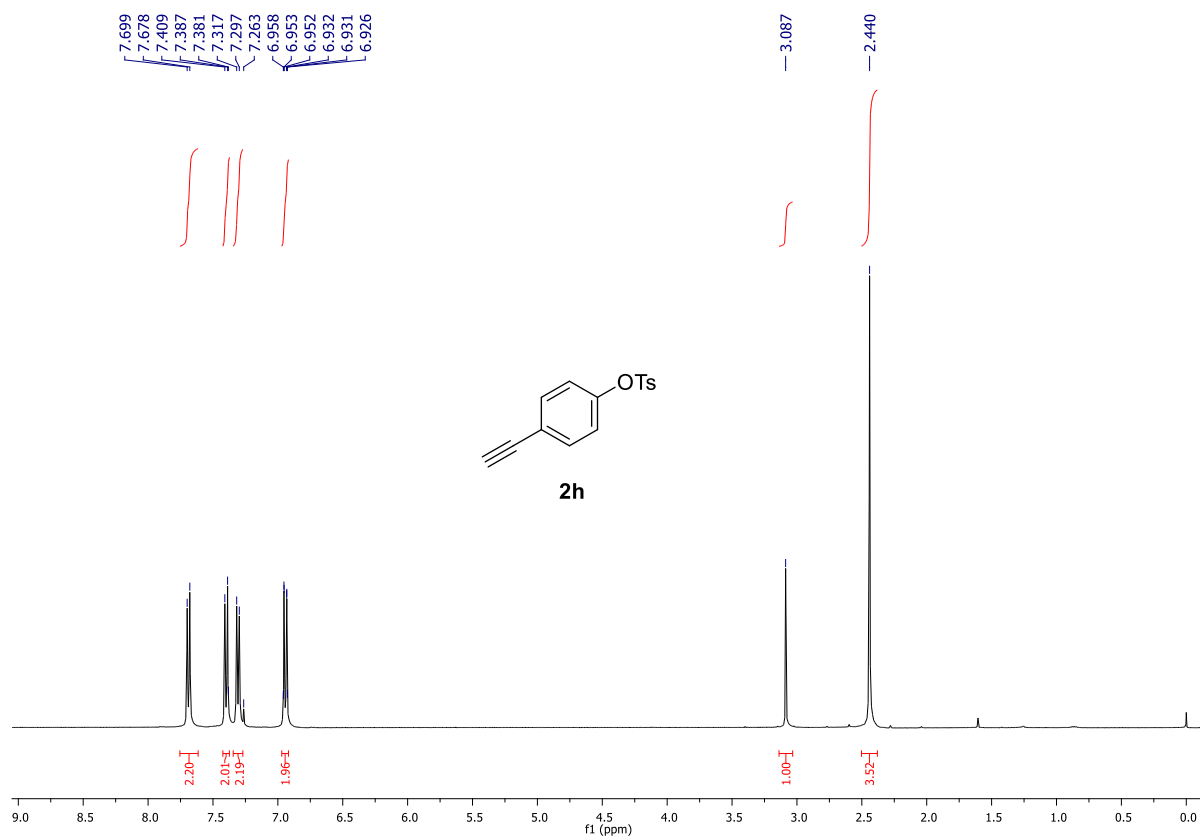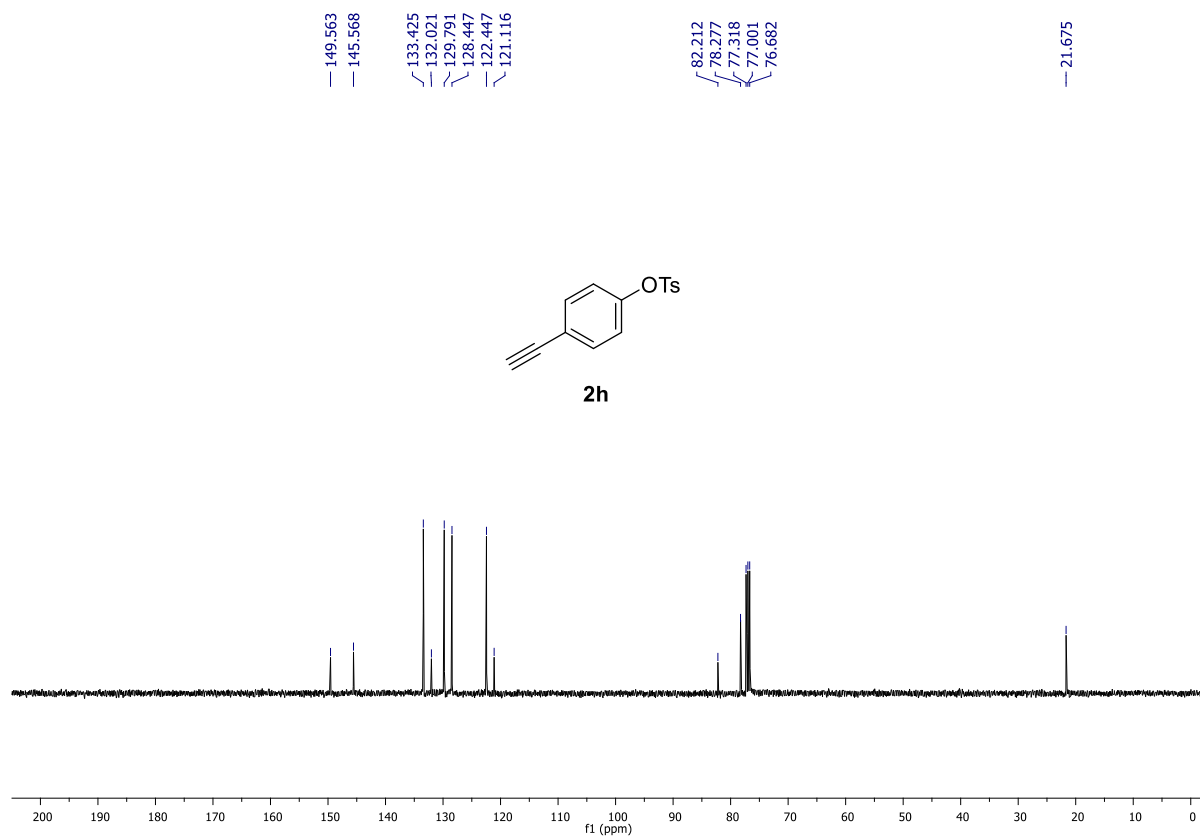

Supplement: c4cc08742a1.pdf [file c4cc08742a1.pdf]
